# Supplementary material
Source: PubMed Central journal article supplement (PMC5710739)

# Highly Versatile $\beta$ -C(sp<sup>3</sup>)-H Iodination of Ketones Using a Practical Auxiliary

Ru-Yi Zhu, Luo-Yan Liu and Jin-Quan Yu\*

Department of Chemistry, The Scripps Research Institute, 10550 North Torrey Pines Road,  
La Jolla, California 92037

## Table of Contents

|                                                    |     |
|----------------------------------------------------|-----|
| General Information                                | S1  |
| Substrate Structures                               | S2  |
| Experimental Section                               |     |
| Substrate Preparation                              | S3  |
| Optimization of C(sp <sup>3</sup> )-H Iodination   | S10 |
| C(sp <sup>3</sup> )-H Iodination                   | S11 |
| The Synthesis and Characterization of Palladacycle | S25 |
| Measurement of the Kinetic Isotope Effect          | S35 |
| References                                         | S38 |
| <sup>1</sup> H and <sup>13</sup> C NMR Spectra     | S38 |

## General Information

Ketones were obtained from the commercial sources or synthesized following literature procedures, and used to prepare the corresponding substrates. Aminooxyacetic acid hemihydrochloride was obtained from Combi-Blocks. I<sub>2</sub> was obtained from TCI. PhI(OAc)<sub>2</sub> was obtained from Sigma-Aldrich. Solvents were obtained from Sigma-Aldrich, Alfa-Aesar and Acros and used directly without further purification. Analytical thin layer chromatography was performed on 0.25 mm silica gel 60-F254. Visualization was carried out with UV light and Vogel's permanganate. <sup>1</sup>H NMR was recorded on Bruker AMX-400 instrument (400 MHz) or Bruker DRX-600 instrument (600 MHz). Chemical shifts were quoted in parts per million (ppm) referenced to 0.0 ppm for tetramethylsilane. The following abbreviations (or combinations thereof) were used to explain multiplicities: s = singlet, d = doublet, t = triplet, q = quartet, m = multiplet, br = broad. Coupling constants, *J*, were reported in Hertz unit (Hz). <sup>13</sup>C NMR spectra were recorded on Bruker AMX-400 instrument (100 MHz) or Bruker DRX-600 instrument (150 MHz), and were fully decoupled by broad band proton decoupling. <sup>19</sup>F NMR spectra were recorded on Bruker AMX-400 instrument (100 MHz), and were fully decoupled by broad band proton decoupling. Chemical shifts were reported in ppm referenced to either the center line of a triplet at 77.0 ppm of chloroform-*d* or the center line of a multiplet at 29.84 ppm of acetone-*d*<sup>6</sup>. In the <sup>13</sup>C NMR analysis, peaks that correspond to those of the polyfluoroarylamide auxiliary appeared as nearly invisible, complex sets of multiplets; they were omitted in the following spectroscopic analysis. High-resolution mass spectra (HRMS) were recorded on an Agilent Mass spectrometer using ESI-TOF (electrospray ionization-time of flight).

## Substrate Structures

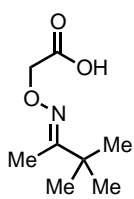

1a

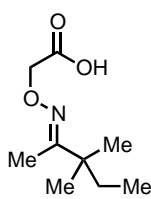

1b

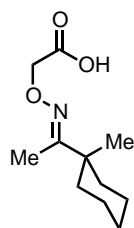

1c

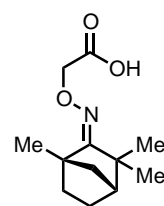

1d

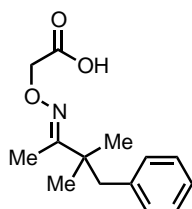

1e

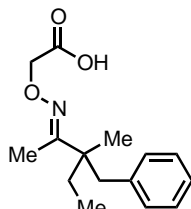

1f

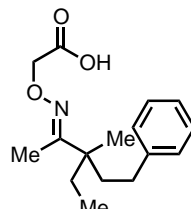

1g

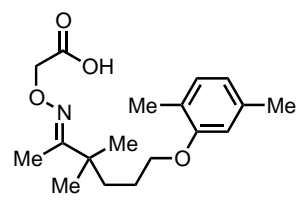

1h

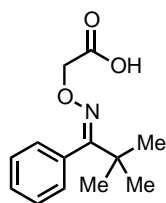

1i

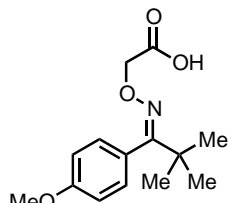

1j

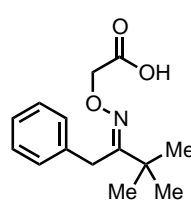

1k

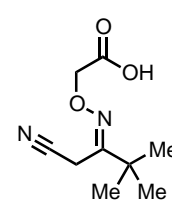

1l

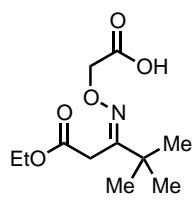

1m

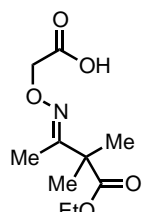

1n

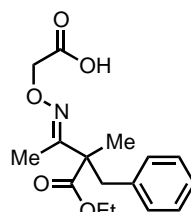

1o

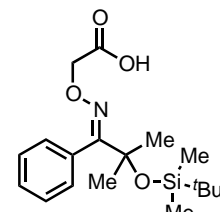

1p

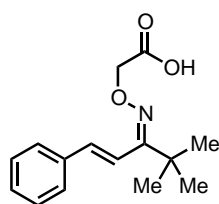

1q

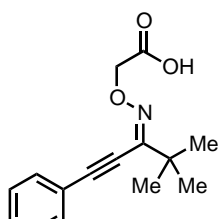

1r

## Experimental Section

### Substrate Preparation

Ketones for substrates **1a**, **1b**, **1d**, **1i**, **1l**, **1m** and **1p** are commercial available. Ketones for substrates **1e**, **1f** and **1g** were synthesized following literature procedures.<sup>1</sup> Ketones for substrates **1c** and **1h** were synthesized by the reaction between corresponding carboxylic acids and MeLi. The procedure can be found in literature.<sup>2</sup> Ketone for substrate **1j** was synthesized following literature procedures.<sup>3</sup> Ketone for substrate **1k** was synthesized following literature procedures.<sup>2</sup> Ketones for substrates **1n** and **1o** were synthesized following literature procedures.<sup>4</sup> Ketone for substrate **1q** was synthesized following literature procedures.<sup>5</sup> Ketone for substrate **1r** was synthesized following literature procedures.<sup>6</sup>

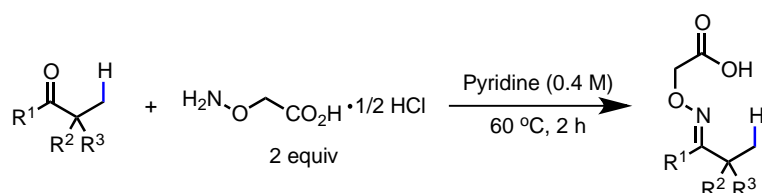

Ketone (2 mmol, 1 equiv) and aminoxyacetic acid hemihydrochloride (4 mmol, 437 mg, 2 equiv) were weighed into an oven dried 50 mL round bottom flask with a magnetic stir bar under air. 5 mL Pyridine was added and the mixture was stirred at 60 °C for 2 h. Upon completion, most pyridine was evaporated under vacuum. The resulting mixture was diluted with EtOAc (50 mL) and washed successively with water (100 mL) and diluted HCl aqueous solution (100 mL, ca. 0.01 M). The organic phase was dried with anhydrous Na<sub>2</sub>SO<sub>4</sub> and the solvent was removed under vacuum. Notably, the pure compounds were obtained in good yields for all cases without chromatography.

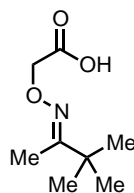

#### **(E)-2-(((3,3-dimethylbutan-2-ylidene)amino)oxy)acetic acid (1a)**

White solid. <sup>1</sup>H NMR (600 MHz, CDCl<sub>3</sub>) δ 4.59 (s, 2H), 1.90 (s, 3H), 1.12 (s, 9H). <sup>13</sup>C NMR (150 MHz, CDCl<sub>3</sub>) δ 174.41, 166.90, 69.93, 37.30, 27.44, 10.88. HRMS (ESI-TOF) Calcd for C<sub>8</sub>H<sub>14</sub>NO<sub>3</sub><sup>-</sup> [M-H]<sup>-</sup>: 172.0979, found: 172.0972.

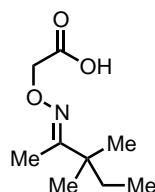

#### **(E)-2-(((3,3-dimethylpentan-2-ylidene)amino)oxy)acetic acid (1b)**

White solid. <sup>1</sup>H NMR (600 MHz, CDCl<sub>3</sub>) δ 4.58 (s, 2H), 1.86 (s, 3H), 1.47 (q, *J* = 7.2 Hz, 2H), 1.08 (s, 6H), 0.76 (t, *J* = 7.2 Hz, 3H). <sup>13</sup>C NMR (150 MHz, CDCl<sub>3</sub>) δ 174.73, 165.83, 70.05, 40.67, 32.74, 24.97, 10.79, 8.81. HRMS (ESI-TOF) Calcd for C<sub>9</sub>H<sub>16</sub>NO<sub>3</sub><sup>-</sup> [M-H]<sup>-</sup>: 186.1136,

found: 186.1132.

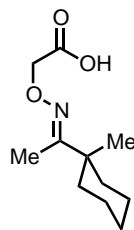

**(E)-2-(((1-(1-methylcyclohexyl)ethylidene)amino)oxy)acetic acid (1c)**

Colorless oil.  $^1\text{H}$  NMR (600 MHz,  $\text{CDCl}_3$ )  $\delta$  4.60 (s, 2H), 1.88 (s, 3H), 1.82-1.79 (m, 2H), 1.51-1.31 (m, 8H), 1.07 (s, 3H).  $^{13}\text{C}$  NMR (150 MHz,  $\text{CDCl}_3$ )  $\delta$  174.06, 166.24, 69.81, 40.78, 35.20, 35.15, 26.05, 25.97, 22.35. HRMS (ESI-TOF) Calcd for  $\text{C}_{11}\text{H}_{18}\text{NO}_3^-$  [M-H] $^-$ : 212.1292, found: 212.1287.

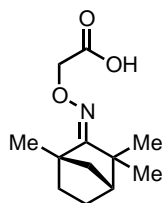

**2-(((E)-((1S,4R)-1,3,3-trimethylbicyclo[2.2.1]heptan-2-ylidene)amino)oxy)acetic acid (1d)**

**1d** was synthesized following the general procedures except the reaction temperature is 120  $^\circ\text{C}$  and the reaction time is 12 h. White solid.  $^1\text{H}$  NMR (600 MHz,  $\text{CDCl}_3$ )  $\delta$  4.51 (s, 2H), 1.87-1.84 (m, 1H), 1.81-1.78 (m, 1H), 1.75-1.73 (m, 1H), 1.61-1.59 (m, 2H), 1.44-1.38 (m, 2H), 1.30 (s, 3H), 1.28 (s, 3H), 1.21 (s, 3H).  $^{13}\text{C}$  NMR (150 MHz,  $\text{CDCl}_3$ )  $\delta$  176.60, 173.20, 69.98, 50.55, 48.49, 45.04, 43.31, 34.19, 25.11, 23.26, 22.47, 16.88. HRMS (ESI-TOF) Calcd for  $\text{C}_{12}\text{H}_{18}\text{NO}_3^-$  [M-H] $^-$ : 224.1292, found: 224.1288.

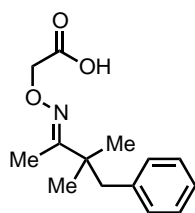

**(E)-2-(((3,3-dimethyl-4-phenylbutan-2-ylidene)amino)oxy)acetic acid (1e)**

Pale yellow oil.  $^1\text{H}$  NMR (600 MHz,  $\text{CDCl}_3$ )  $\delta$  7.27-7.19 (m, 3H), 7.06-7.04 (m, 2H), 4.52 (s, 2H), 2.74 (s, 2H), 1.96 (s, 3H), 1.09 (s, 6H).  $^{13}\text{C}$  NMR (150 MHz,  $\text{CDCl}_3$ )  $\delta$  174.64, 165.30, 137.90, 130.26, 127.81, 126.25, 70.12, 46.05, 41.36, 25.11, 11.65. HRMS (ESI-TOF) Calcd for  $\text{C}_{14}\text{H}_{18}\text{NO}_3^-$  [M-H] $^-$ : 248.1292, found: 248.1297.

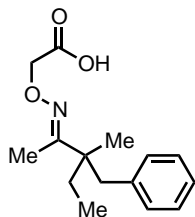

**(E)-2-(((3-benzyl-3-methylpentan-2-ylidene)amino)oxy)acetic acid (1f)**

Pale yellow oil.  $^1\text{H}$  NMR (600 MHz,  $\text{CDCl}_3$ )  $\delta$  7.26-7.23 (m, 2H), 7.21-7.19 (m, 1H), 7.05-7.04 (m, 2H), 4.54 (ABq,  $J = 16.8$  Hz, 2H), 2.82 (d,  $J = 13.8$  Hz, 1H), 2.67 (d,  $J = 13.8$  Hz, 1H), 1.94 (s, 3H), 1.71-1.65 (m, 1H), 1.42-1.36 (m, 1H), 0.99 (s, 3H), 0.80 (t,  $J = 7.2$  Hz, 3H).  $^{13}\text{C}$  NMR (150 MHz,  $\text{CDCl}_3$ )  $\delta$  173.94, 164.61, 137.76, 130.27, 127.83, 126.26, 70.01, 45.12, 44.97, 31.10, 20.78, 11.70, 8.64. HRMS (ESI-TOF) Calcd for  $\text{C}_{15}\text{H}_{20}\text{NO}_3^-$  [M-H] $^-$ : 262.1449, found: 262.1442.

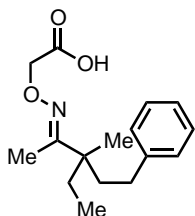

**(E)-2-(((3-ethyl-3-methyl-5-phenylpentan-2-ylidene)amino)oxy)acetic acid (1g)**

Pale yellow oil.  $^1\text{H}$  NMR (600 MHz,  $\text{CDCl}_3$ )  $\delta$  7.28-7.25 (m, 2H), 7.18-7.14 (m, 3H), 4.63 (s, 2H), 2.52 (td,  $J = 5.4$  Hz,  $J = 13.2$  Hz, 1H), 2.38 (td,  $J = 4.8$  Hz,  $J = 13.2$  Hz, 1H), 1.86 (s, 3H), 1.83-1.78 (m, 1H), 1.66-1.54 (m, 2H), 1.47-1.41 (m, 1H), 1.12 (s, 3H), 0.78 (t,  $J = 7.2$  Hz, 3H).  $^{13}\text{C}$  NMR (150 MHz,  $\text{CDCl}_3$ )  $\delta$  174.43, 164.66, 142.62, 128.36, 128.25, 125.73, 69.89, 44.07, 41.00, 31.70, 30.77, 20.68, 10.89, 8.38. HRMS (ESI-TOF) Calcd for  $\text{C}_{16}\text{H}_{22}\text{NO}_3^-$  [M-H] $^-$ : 276.1605, found: 276.1609.

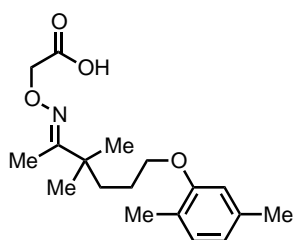

**(E)-2-(((6-(2,5-dimethylphenoxy)-3,3-dimethylhexan-2-ylidene)amino)oxy)acetic acid (1h)**

Colorless oil.  $^1\text{H}$  NMR (600 MHz,  $\text{CDCl}_3$ )  $\delta$  7.00 (d,  $J = 7.2$  Hz, 1H), 6.66 (d,  $J = 7.6$  Hz, 1H), 6.60 (s, 1H), 4.60 (s, 2H), 3.92-3.88 (m, 2H), 2.30 (s, 3H), 2.17 (s, 3H), 1.90 (s, 3H), 1.66-1.63 (m, 4H), 1.14 (s, 6H).  $^{13}\text{C}$  NMR (150 MHz,  $\text{CDCl}_3$ )  $\delta$  173.98, 166.02, 156.92, 136.48, 130.28, 123.48, 120.67, 111.88, 69.85, 67.78, 40.31, 36.65, 25.48, 24.78, 21.38, 15.78, 10.85. HRMS (ESI-TOF) Calcd for  $\text{C}_{18}\text{H}_{26}\text{NO}_4^-$  [M-H] $^-$ : 320.1867, found: 320.1862.

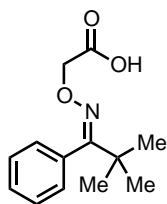

**(Z)-2-(((2,2-dimethyl-1-phenylpropylidene)amino)oxy)acetic acid (1i)**

White solid. <sup>1</sup>H NMR (600 MHz, CDCl<sub>3</sub>) δ 7.42-7.39 (m, 2H), 7.37-7.34 (m, 1H), 7.12-7.10 (m, 2H), 4.51 (s, 2H), 1.17 (s, 9H). <sup>13</sup>C NMR (150 MHz, CDCl<sub>3</sub>) δ 174.65, 168.26, 127.91, 127.90, 127.35, 127.34, 70.23, 37.48, 28.16. HRMS (ESI-TOF) Calcd for C<sub>13</sub>H<sub>16</sub>NO<sub>3</sub><sup>-</sup> [M-H]<sup>-</sup>: 234.1136, found: 234.1130.

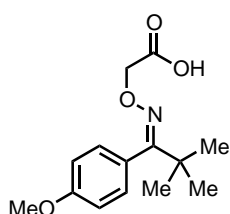

**(Z)-2-(((1-(4-methoxyphenyl)-2,2-dimethylpropylidene)amino)oxy)acetic acid (1j)**

White solid. <sup>1</sup>H NMR (600 MHz, CDCl<sub>3</sub>) δ 7.06-7.04 (m, 2H), 6.95-6.92 (m, 2H), 4.54 (s, 2H), 3.82 (s, 3H), 1.16 (s, 9H). <sup>13</sup>C NMR (150 MHz, CDCl<sub>3</sub>) δ 174.14, 168.57, 159.15, 128.59, 125.62, 113.47, 70.04, 55.14, 37.71, 28.17. HRMS (ESI-TOF) Calcd for C<sub>14</sub>H<sub>18</sub>NO<sub>4</sub><sup>-</sup> [M-H]<sup>-</sup>: 262.1241, found: 262.1247.

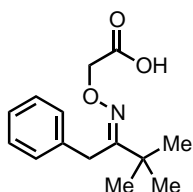

**(E)-2-(((3,3-dimethyl-1-phenylbutan-2-ylidene)amino)oxy)acetic acid (1k)**

Pale yellow oil. <sup>1</sup>H NMR (600 MHz, CDCl<sub>3</sub>) δ 7.28-7.25 (m, 2H), 7.23-7.22 (m, 2H), 7.19-7.17 (m, 1H), 4.63 (s, 2H), 3.81 (s, 2H), 1.11 (s, 9H). <sup>13</sup>C NMR (150 MHz, CDCl<sub>3</sub>) δ 174.94, 167.09, 136.77, 128.43, 128.25, 126.08, 69.95, 37.81, 31.80, 28.13. HRMS (ESI-TOF) Calcd for C<sub>14</sub>H<sub>18</sub>NO<sub>3</sub><sup>-</sup> [M-H]<sup>-</sup>: 248.1292, found: 248.1299.

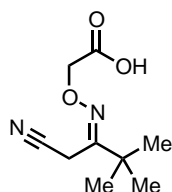

**(E)-2-(((1-cyano-3,3-dimethylbutan-2-ylidene)amino)oxy)acetic acid (1l)**

Colorless oil. <sup>1</sup>H NMR (600 MHz, CDCl<sub>3</sub>) δ 4.75 (s, 2H), 3.36 (s, 2H), 1.19 (s, 9H). <sup>13</sup>C NMR (150 MHz, CDCl<sub>3</sub>) δ 174.19, 157.34, 115.14, 70.19, 37.46, 27.14, 13.66. HRMS (ESI-TOF) Calcd for C<sub>9</sub>H<sub>13</sub>N<sub>2</sub>O<sub>3</sub><sup>-</sup> [M-H]<sup>-</sup>: 197.0932, found: 197.0939.

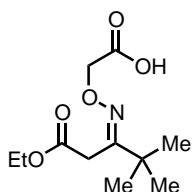

**(E)-2-(((1-ethoxy-4,4-dimethyl-1-oxopentan-3-ylidene)amino)oxy)acetic acid (1m)**

Colorless oil.  $^1\text{H}$  NMR (600 MHz,  $\text{CDCl}_3$ )  $\delta$  4.64 (s, 2H), 4.21 (q,  $J = 7.2$  Hz, 2H), 3.42 (s, 2H), 1.28 (t,  $J = 7.2$  Hz, 3H), 1.12 (s, 9H).  $^{13}\text{C}$  NMR (150 MHz,  $\text{CDCl}_3$ )  $\delta$  172.06, 170.18, 162.19, 70.92, 62.10, 37.31, 31.53, 26.96, 13.97. HRMS (ESI-TOF) Calcd for  $\text{C}_{11}\text{H}_{18}\text{NO}_5^-$   $[\text{M}-\text{H}]^-$ : 244.1190, found: 244.1185.

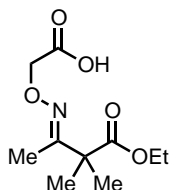

**(E)-2-(((4-ethoxy-3,3-dimethyl-4-oxobutan-2-ylidene)amino)oxy)acetic acid (1n)**

Colorless oil.  $^1\text{H}$  NMR (400 MHz,  $\text{CDCl}_3$ )  $\delta$  4.65 (s, 2H), 4.16 (q,  $J = 7.2$  Hz, 2H), 1.89 (s, 3H), 1.37 (s, 6H), 1.24 (t,  $J = 7.2$  Hz, 3H).  $^{13}\text{C}$  NMR (150 MHz,  $\text{CDCl}_3$ )  $\delta$  174.70, 174.20, 161.35, 70.02, 61.17, 48.95, 23.04, 14.02, 12.46. HRMS (ESI-TOF) Calcd for  $\text{C}_{10}\text{H}_{16}\text{NO}_5^-$   $[\text{M}-\text{H}]^-$ : 230.1034, found: 230.1030.

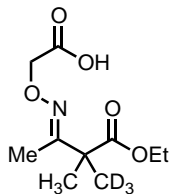

**(E)-2-(((4-ethoxy-3-methyl-3-dueteratedmethyl-4-oxobutan-2-ylidene)amino)oxy)acetic acid (1n- $d^3$ )**

Colorless oil.  $^1\text{H}$  NMR (400 MHz,  $\text{CDCl}_3$ )  $\delta$  4.65 (s, 2H), 4.16 (q,  $J = 7.2$  Hz, 2H), 1.88 (s, 3H), 1.36 (s, 3H), 1.24 (t,  $J = 7.2$  Hz, 3H).  $^{13}\text{C}$  NMR (150 MHz,  $\text{CDCl}_3$ )  $\delta$  174.75, 174.60, 161.17, 70.00, 61.14, 48.74, 22.93, 14.01, 12.43. HRMS (ESI-TOF) Calcd for  $\text{C}_{10}\text{H}_{13}\text{D}_3\text{NO}_5^-$   $[\text{M}-\text{H}]^-$ : 233.1222, found: 233.1217.

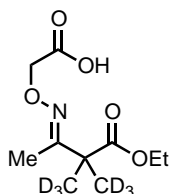

**(E)-2-(((4-ethoxy-3,3-didueteratedmethyl-4-oxobutan-2-ylidene)amino)oxy)acetic acid (1n- $d^6$ )**

Pale yellow oil.  $^1\text{H}$  NMR (400 MHz,  $\text{CDCl}_3$ )  $\delta$  4.65 (s, 2H), 4.16 (q,  $J = 7.2$  Hz, 2H), 1.88 (s, 3H), 1.24 (t,  $J = 7.2$  Hz, 3H).  $^{13}\text{C}$  NMR (150 MHz,  $\text{CDCl}_3$ )  $\delta$  174.77, 174.61, 161.15, 70.00,

61.13, 48.52, 29.78, 14.02, 12.42. HRMS (ESI-TOF) Calcd for  $C_{10}H_{10}D_6NO_5^-$  [M-H]<sup>-</sup>: 236.1411, found: 236.1414.

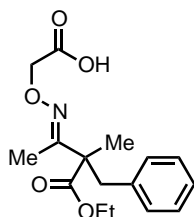

**(E)-2-(((3-benzyl-4-ethoxy-3-methyl-4-oxobutan-2-ylidene)amino)oxy)acetic acid (1o)**

Pale yellow oil. <sup>1</sup>H NMR (400 MHz, CDCl<sub>3</sub>) δ 7.24-7.20 (m, 3H), 7.09-7.07 (m, 2H), 4.63 (s, 2H), 4.16 (q, *J* = 7.2 Hz, 2H), 3.25 (d, *J* = 13.6 Hz, 1H), 3.06 (d, *J* = 13.6 Hz, 1H), 1.91 (s, 3H), 1.26 (s, 3H), 1.24 (t, *J* = 8.8 Hz, 3H). <sup>13</sup>C NMR (150 MHz, CDCl<sub>3</sub>) δ 174.33, 173.60, 160.37, 136.65, 130.35, 128.01, 126.70, 70.08, 61.24, 53.82, 41.05, 20.19, 14.01, 13.30. HRMS (ESI-TOF) Calcd for  $C_{16}H_{20}NO_5^-$  [M-H]<sup>-</sup>: 306.1347, found: 306.1340.

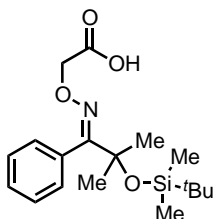

**(E)-6,6,8,8,9,9-hexamethyl-5-phenyl-3,7-dioxa-4-aza-8-siladec-4-en-1-oic acid (1p)**

White solid. <sup>1</sup>H NMR (600 MHz, CDCl<sub>3</sub>) δ 7.43-7.34 (m, 3H), 7.26-7.24 (m, 2H), 4.57 (s, 2H), 1.48 (s, 6H), 0.77 (s, 9H), 0.02 (s, 6H). <sup>13</sup>C NMR (150 MHz, CDCl<sub>3</sub>) δ 174.26, 165.76, 132.70, 128.17, 128.11, 127.65, 75.58, 70.14, 29.18, 25.75, 18.09, -2.16. HRMS (ESI-TOF) Calcd for  $C_{18}H_{28}NO_4Si^-$  [M-H]<sup>-</sup>: 350.1793, found: 350.1790.

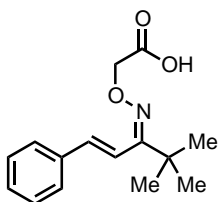

**2-(((E)-((E)-4,4-dimethyl-1-phenylpent-1-en-3-ylidene)amino)oxy)acetic acid (1q)**

Pale yellow oil. <sup>1</sup>H NMR (600 MHz, CDCl<sub>3</sub>) δ 7.49-7.47 (m, 2H), 7.42 (d, *J* = 16.8 Hz, 1H), 7.38-7.35 (m, 2H), 7.33-7.30 (m, 1H), 6.64 (d, *J* = 16.8 Hz, 1H), 4.67 (s, 2H), 1.24 (s, 9H). <sup>13</sup>C NMR (150 MHz, CDCl<sub>3</sub>) δ 173.28, 163.69, 139.88, 136.47, 128.93, 128.74, 127.00, 116.29, 70.31, 37.70, 28.63. HRMS (ESI-TOF) Calcd for  $C_{15}H_{18}NO_3^-$  [M-H]<sup>-</sup>: 260.1292, found: 260.1299.



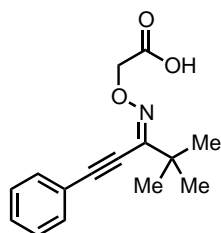

**(Z)-2-(((4,4-dimethyl-1-phenylpent-1-yn-3-ylidene)amino)oxy)acetic acid (1r)**

Pale yellow oil.  $^1\text{H}$  NMR (600 MHz,  $\text{CDCl}_3$ )  $\delta$  7.54-7.52 (m, 2H), 7.39-7.34 (m, 3H), 4.72 (s, 2H), 1.26 (s, 9H).  $^{13}\text{C}$  NMR (150 MHz,  $\text{CDCl}_3$ )  $\delta$  173.92, 152.03, 132.13, 129.51, 128.40, 121.70, 101.73, 78.71, 70.52, 37.39, 28.06. HRMS (ESI-TOF) Calcd for  $\text{C}_{15}\text{H}_{16}\text{NO}_3^-$  [M-H] $^-$ : 258.1136, found: 258.1132.

## Optimization of C(sp<sup>3</sup>)-H Iodination Solvent Screening<sup>a,b</sup>

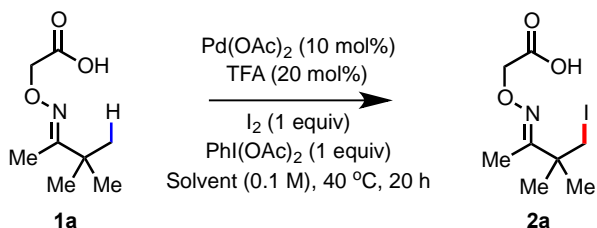

| Solvent                                       | <sup>1</sup> H NMR yield | Solvent            | <sup>1</sup> H NMR yield |
|-----------------------------------------------|--------------------------|--------------------|--------------------------|
| DCM                                           | 30%                      | Et <sub>2</sub> O  | 38%                      |
| DCE                                           | 21%                      | TBME               | 26%                      |
| EtOAc                                         | 35%                      | CH <sub>3</sub> CN | 0%                       |
| C <sub>6</sub> F <sub>5</sub> CF <sub>3</sub> | 23%                      | <i>t</i> -AmylOH   | 7%                       |
| CHCl <sub>3</sub>                             | 30%                      | DMF                | 0%                       |
| THF                                           | 37%                      | 1,4-dioxane        | 66% (2.7:1) <sup>c</sup> |

<sup>a</sup> Conditions: **1a** (0.1 mmol, 1.0 equiv), Pd(OAc)<sub>2</sub> (10 mol%), TFA (20 mol%), I<sub>2</sub> (1.0 equiv), PhI(OAc)<sub>2</sub> (1.0 equiv), solvent (1.0 mL), 40 °C, under air, 20 h. <sup>b</sup> The yield was determined by <sup>1</sup>H NMR analysis of the crude product using CH<sub>2</sub>Br<sub>2</sub> as the internal standard. <sup>c</sup> The numbers in parenthesis indicate the ratio of mono:di.

## Condition Screening<sup>a,b,c</sup>

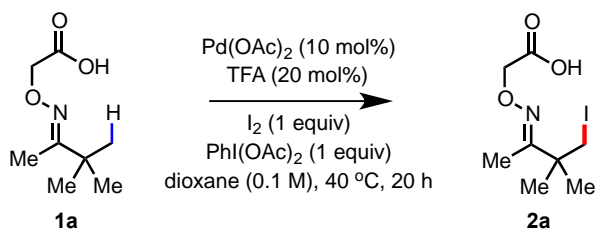

| Condition                       | <sup>1</sup> H NMR yield | Condition                                                                  | <sup>1</sup> H NMR yield |
|---------------------------------|--------------------------|----------------------------------------------------------------------------|--------------------------|
| Pd(TFA) <sub>2</sub>            | 69% (2.0:1)              | PhI(OAc) <sub>2</sub> (1.5 eq.)<br>I <sub>2</sub> (1.5 eq.) <sup>d</sup>   | Messy, poor mass balance |
| 50 °C                           | 55% (2.7:1)              | PhI(OAc) <sub>2</sub> (0.75 eq.)<br>I <sub>2</sub> (0.75 eq.) <sup>d</sup> | 78% (1.4:1)              |
| 30 °C                           | 51% (6.3:1)              | under N <sub>2</sub> <sup>d</sup>                                          | 70% (4.3:4.7:1)          |
| w/o TFA                         | 71% (3.6:4.2:1)          | 1,4-dioxane (0.13 M) <sup>d</sup>                                          | 80% (15:11:1)            |
| w/o TFA<br>Pd(TFA) <sub>2</sub> | 81% (14:12:1)            | 1,4-dioxane (0.08 M) <sup>d</sup>                                          | 88% (1:1.3)              |

<sup>a</sup> Conditions: **1a** (0.1 mmol, 1.0 equiv), Pd(OAc)<sub>2</sub> (10 mol%), TFA (20 mol%), I<sub>2</sub> (1.0 equiv), PhI(OAc)<sub>2</sub> (1.0 equiv), 1,4-dioxane (1.0 mL), 40 °C, under air, 20 h. <sup>b</sup> The yield was determined by <sup>1</sup>H NMR analysis of the crude product using CH<sub>2</sub>Br<sub>2</sub> as the internal standard. <sup>c</sup> The numbers in parenthesis indicate the ratio of mono:di or mono:di:tri (if applicable). <sup>d</sup> Without TFA, use Pd(TFA)<sub>2</sub> instead of Pd(OAc)<sub>2</sub>.

## C(sp<sup>3</sup>)-H Iodination

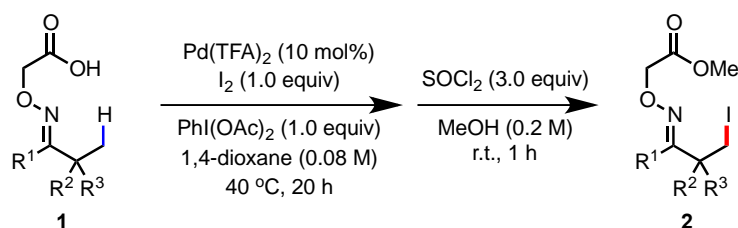

**General Procedures for the C(sp<sup>3</sup>)-H Iodination of UV Active Ketones:** Substrate **1** (0.10 mmol), Pd(TFA)<sub>2</sub> (0.01 mmol, 3.3 mg), I<sub>2</sub> (0.10 mmol, 25.4 mg) and PhI(OAc)<sub>2</sub> (0.10 mmol, 32.2 mg) were weighed into a reaction vial (10 mL) with a magnetic stir bar under air. 1,4-Dioxane (1.25 mL) was added, and the vial was sealed with a cap. The reaction mixture was stirred at 40 °C for 20 hours. Upon completion, the reaction mixture was cooled to room temperature and diluted with EtOAc. Then the reaction mixture was filtered through a plug of silicon gel and transferred to a reaction vial (10 mL) with a magnetic stir bar. The solvent was evaporated under vacuum. Anhydrous MeOH (0.5 mL) was added to the mixture. SOCl<sub>2</sub> (0.30 mmol, 22 μL) was added dropwise at room temperature. The vial was sealed with a cap. The reaction mixture was stirred at room temperature for 1 hour. Upon completion, the reaction mixture was cooled to room temperature and the solvent was removed under vacuum. The resulting mixture was purified by preparative thin-layer chromatography.

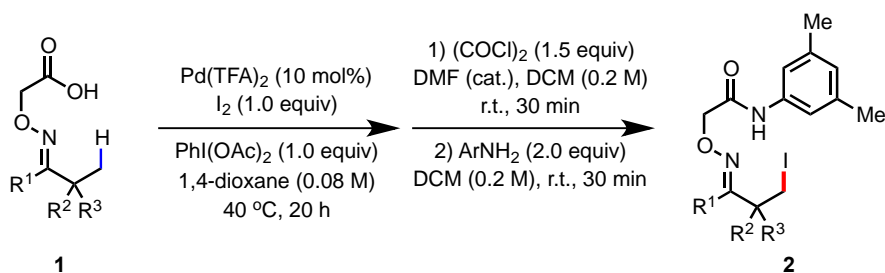

**General Procedures for the C(sp<sup>3</sup>)-H Iodination of UV Inactive Ketones:** Substrate **1** (0.10 mmol), Pd(TFA)<sub>2</sub> (0.01 mmol, 3.3 mg), I<sub>2</sub> (0.10 mmol, 25.4 mg) and PhI(OAc)<sub>2</sub> (0.10 mmol, 32.2 mg) were weighed into a reaction vial (10 mL) with a magnetic stir bar under air. 1,4-Dioxane (1.25 mL) was added, and the vial was sealed with a cap. The reaction mixture was stirred at 40 °C for 20 hours. Upon completion, the reaction mixture was cooled to room temperature and diluted with EtOAc. Then the reaction mixture was filtered through a plug of silicon gel and transferred to a reaction vial (10 mL) with a magnetic stir bar. The solvent was evaporated under vacuum. Anhydrous DCM (0.5 mL) and DMF (ca. 10 μL) were added to the mixture. (COCl)<sub>2</sub> (0.15 mmol, 13 μL) was added dropwise at room temperature. The vial was sealed with a cap. The reaction mixture was stirred at room temperature for 30 min before excess (COCl)<sub>2</sub> and solvent were evaporated. To the mixture was added anhydrous DCM (0.5 mL), followed by the dropwise addition of 3,5-dimethylaniline (0.2 mmol, 25 μL) to the mixture at room temperature. The vial was sealed with a cap. The reaction mixture was stirred at room temperature for 30 min. Upon completion, the reaction mixture was diluted with EtOAc. Then the reaction mixture was filtered through a plug of celite and the solvent was removed under vacuum. The resulting mixture was purified by preparative thin-layer chromatography.

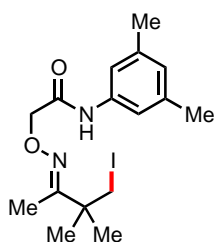

**(*E*)-*N*-(3,5-dimethylphenyl)-2-(((4-iodo-3,3-dimethylbutan-2-ylidene)amino)oxy)acetamide (**2a-mono**)**

Substrate **1a** was iodinated following the general iodination procedure. After purification by preparative thin-layer chromatography (Hexane : EtOAc = 5:1 as eluent), **2a-mono** was obtained as a colorless oil (14.1 mg, 35%). <sup>1</sup>H NMR (600 MHz, CDCl<sub>3</sub>) δ 7.86 (br s, 1H), 7.19 (s, 2H), 6.76 (s, 1H), 4.62 (s, 2H), 3.31 (s, 2H), 2.29 (s, 6H), 1.96 (s, 3H), 1.29 (s, 6H). <sup>13</sup>C NMR (150 MHz, CDCl<sub>3</sub>) δ 168.32, 163.16, 138.66, 136.98, 126.25, 117.88, 73.01, 41.14, 25.46, 21.34, 18.61, 10.85. HRMS (ESI-TOF) Calcd for C<sub>16</sub>H<sub>24</sub>IN<sub>2</sub>O<sub>2</sub><sup>+</sup> [M+H]<sup>+</sup>: 403.0877, found: 403.0873.

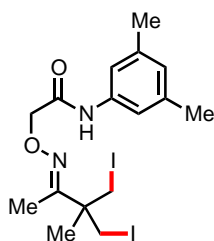

**(*E*)-*N*-(3,5-dimethylphenyl)-2-(((4-iodo-3-(iodomethyl)-3-methylbutan-2-ylidene)amino)oxy)acetamide (**2a-di**)**

Substrate **1a** was iodinated following the general iodination procedure. After purification by preparative thin-layer chromatography (Hexane : EtOAc = 5:1 as eluent), **2a-di** was obtained as a colorless oil (26.4 mg, 50%). <sup>1</sup>H NMR (600 MHz, CDCl<sub>3</sub>) δ 7.75 (br s, 1H), 7.19 (s, 2H), 6.76 (s, 1H), 4.65 (s, 2H), 3.46 (ABq, *J* = 10.2 Hz, 4H), 2.29 (s, 6H), 2.02 (s, 3H), 1.41 (s, 3H). <sup>13</sup>C NMR (150 MHz, CDCl<sub>3</sub>) δ 167.87, 160.45, 138.67, 136.81, 126.34, 117.88, 73.21, 43.67, 23.74, 21.33, 15.46, 11.62. HRMS (ESI-TOF) Calcd for C<sub>16</sub>H<sub>23</sub>I<sub>2</sub>N<sub>2</sub>O<sub>2</sub><sup>+</sup> [M+H]<sup>+</sup>: 528.9843, found: 528.9849.

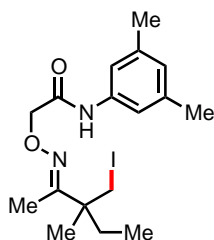

**(*E*)-*N*-(3,5-dimethylphenyl)-2-(((3-(iodomethyl)-3-methylpentan-2-ylidene)amino)oxy)acetamide (**2b-mono**)**

Substrate **1b** was iodinated following the general iodination procedure. After purification by preparative thin-layer chromatography (Hexane : EtOAc = 5:1 as eluent), **2b-mono** was obtained as a colorless oil (12.5 mg, 30%). <sup>1</sup>H NMR (600 MHz, CDCl<sub>3</sub>) δ 7.83 (br s, 1H),

7.18 (s, 2H), 6.76 (s, 1H), 4.63 (ABq,  $J = 16.2$  Hz, 2H), 3.31 (ABq,  $J = 10.2$  Hz, 2H), 2.29 (s, 6H), 1.93 (s, 3H), 1.76-1.70 (m, 1H), 1.56-1.51 (m, 1H), 1.20 (s, 3H), 0.83 (t,  $J = 7.2$  Hz, 3H).  $^{13}\text{C}$  NMR (150 MHz,  $\text{CDCl}_3$ )  $\delta$  168.33, 162.34, 138.68, 136.98, 126.24, 117.81, 73.05, 44.45, 30.46, 25.54, 22.63, 21.34, 17.88, 11.02, 9.38. HRMS (ESI-TOF) Calcd for  $\text{C}_{17}\text{H}_{26}\text{IN}_2\text{O}_2^+$   $[\text{M}+\text{H}]^+$ : 417.1033, found: 417.1029.

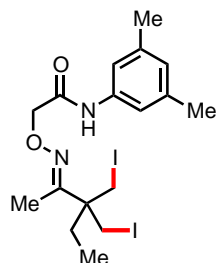

**(*E*)-*N*-(3,5-dimethylphenyl)-2-(((4-iodo-3-(iodomethyl)-3-methylbutan-2-ylidene)amino)oxy)acetamide (**2b-di**)**

Substrate **1b** was iodinated following the general iodination procedure. After purification by preparative thin-layer chromatography (Hexane : EtOAc = 5:1 as eluent), **2b-di** was obtained as a colorless oil (29.0 mg, 55%).  $^1\text{H}$  NMR (600 MHz,  $\text{CDCl}_3$ )  $\delta$  7.72 (br s, 1H), 7.18 (s, 2H), 6.76 (s, 1H), 4.65 (s, 2H), 3.48 (ABq,  $J = 10.8$  Hz, 4H), 2.29 (s, 6H), 2.01 (s, 3H), 1.73 (q,  $J = 7.2$  Hz, 2H), 0.82 (t,  $J = 7.2$  Hz, 3H).  $^{13}\text{C}$  NMR (150 MHz,  $\text{CDCl}_3$ )  $\delta$  167.81, 159.63, 138.69, 136.78, 126.34, 117.80, 73.23, 46.91, 27.87, 21.33, 15.41, 11.84, 9.62. HRMS (ESI-TOF) Calcd for  $\text{C}_{17}\text{H}_{25}\text{I}_2\text{N}_2\text{O}_2^+$   $[\text{M}+\text{H}]^+$ : 543.0000, found: 543.0007.

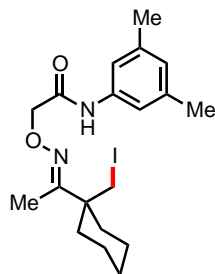

**(*E*)-*N*-(3,5-dimethylphenyl)-2-(((1-(1-(iodomethyl)cyclohexyl)ethylidene)amino)oxy)acetamide (**2c**)**

Substrate **1c** was iodinated following the general iodination procedure except the reaction time is 3 hours. After purification by preparative thin-layer chromatography (Hexane : EtOAc = 5:1 as eluent), **2c** was obtained as a colorless oil (26.5 mg, 60%).  $^1\text{H}$  NMR (600 MHz,  $\text{CDCl}_3$ )  $\delta$  7.89 (br s, 1H), 7.20 (s, 2H), 6.75 (s, 1H), 4.64 (s, 2H), 3.29 (s, 2H), 2.29 (s, 6H), 2.02-1.99 (m, 2H), 1.91 (s, 3H), 1.53-1.31 (m, 8H).  $^{13}\text{C}$  NMR (150 MHz,  $\text{CDCl}_3$ )  $\delta$  168.46, 161.85, 138.60, 136.97, 126.21, 117.93, 73.04, 44.14, 33.77, 25.84, 22.49, 21.32, 18.20, 10.62. HRMS (ESI-TOF) Calcd for  $\text{C}_{19}\text{H}_{28}\text{IN}_2\text{O}_2^+$   $[\text{M}+\text{H}]^+$ : 443.1190, found: 443.1196.

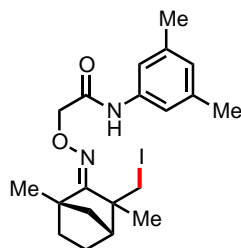

***N*-(3,5-dimethylphenyl)-2-(((*E*)-((1*S*,4*R*)-3-(iodomethyl)-1,3-dimethylbicyclo[2.2.1]heptan-2-ylidene)amino)oxy)acetamide (**2d**)**

Substrate **1d** was iodinated following the general iodination procedure except the reaction time is 3 hours and the reaction time is 3 h. After purification by preparative thin-layer chromatography (Hexane : EtOAc = 5:1 as eluent), **2d** was obtained as a colorless oil (19.1 mg, 42%). <sup>1</sup>H NMR (600 MHz, CDCl<sub>3</sub>) δ 7.84 (br s, 1H), 7.16 (s, 2H), 6.77 (s, 1H), 4.55 (s, 2H), 3.45 (ABq, *J* = 10.2 Hz, 2H), 2.30 (s, 6H), 2.02-1.97 (m, 1H), 1.96-1.93 (m, 1H), 1.92-1.87 (m, 2H), 1.74-1.68 (m, 1H), 1.58-1.56 (m, 1H), 1.49-1.44 (m, 1H), 1.40 (s, 3H), 1.37 (s, 3H). <sup>13</sup>C NMR (150 MHz, CDCl<sub>3</sub>) δ 171.68, 168.39, 138.73, 137.07, 126.26, 117.65, 73.36, 54.54, 47.64, 45.62, 43.05, 32.19, 26.10, 23.06, 22.84, 21.39, 8.31. HRMS (ESI-TOF) Calcd for C<sub>20</sub>H<sub>28</sub>IN<sub>2</sub>O<sub>2</sub><sup>+</sup> [M+H]<sup>+</sup>: 455.1190, found: 455.1195.

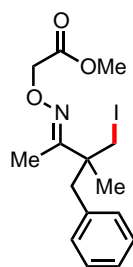

**(*E*)-methyl 2-(((3-benzyl-4-iodo-3-methylbutan-2-ylidene)amino)oxy)acetate (**2e-mono**)**

Substrate **1e** was iodinated following the general iodination procedure. After purification by preparative thin-layer chromatography (Hexane : Acetone = 20:1 as eluent), **2e-mono** was obtained as a colorless oil (15.6 mg, 40%). <sup>1</sup>H NMR (600 MHz, CDCl<sub>3</sub>) δ 7.28-7.27 (m, 2H), 7.24-7.21 (m, 1H), 7.16-7.15 (m, 2H), 4.58 (s, 2H), 3.73 (s, 3H), 3.29 (ABq, *J* = 10.2 Hz, 2H), 2.90 (ABq, *J* = 13.8 Hz, 2H), 1.93 (s, 3H), 1.20 (s, 3H). <sup>13</sup>C NMR (150 MHz, CDCl<sub>3</sub>) δ 170.57, 160.68, 136.94, 130.24, 128.06, 126.61, 70.53, 51.79, 44.48, 43.28, 23.68, 17.84, 11.84. HRMS (ESI-TOF) Calcd for C<sub>15</sub>H<sub>21</sub>INO<sub>3</sub><sup>+</sup> [M+H]<sup>+</sup>: 390.0561, found: 390.0555.

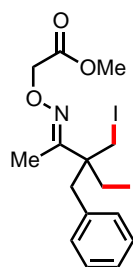

**(*E*)-methyl 2-(((3-benzyl-4-iodo-3-(iodomethyl)butan-2-ylidene)amino)oxy)acetate (**2e-di**)**

Substrate **1e** was iodinated following the general iodination procedure. After purification by preparative thin-layer chromatography (Hexane : Acetone = 20:1 as eluent), **2e-di** was obtained as a colorless oil (20.6 mg, 40%). <sup>1</sup>H NMR (600 MHz, CDCl<sub>3</sub>) δ 7.30-7.21 (m, 5H), 4.54 (s, 2H), 3.70 (s, 3H), 3.43 (ABq, *J* = 10.2 Hz, 4H), 2.97 (s, 2H), 2.00 (s, 3H). <sup>13</sup>C NMR (150 MHz, CDCl<sub>3</sub>) δ 170.20, 157.66, 135.89, 129.72, 128.29, 127.13, 70.74, 51.85, 47.19, 40.04, 15.86, 12.64. HRMS (ESI-TOF) Calcd for C<sub>15</sub>H<sub>20</sub>I<sub>2</sub>NO<sub>3</sub><sup>+</sup> [M+H]<sup>+</sup>: 515.9527, found: 515.9532.

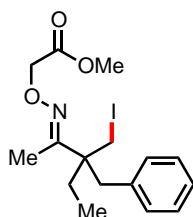

**(E)-methyl 2-(((3-benzyl-3-(iodomethyl)pentan-2-ylidene)amino)oxy)acetate (2f)**

Substrate **1f** was iodinated following the general iodination procedure except the reaction time is 3 hours. After purification by preparative thin-layer chromatography (Hexane : EtOAc = 5:1 as eluent), **2f** was obtained as a colorless oil (29.0 mg, 72%). <sup>1</sup>H NMR (600 MHz, CDCl<sub>3</sub>) δ 7.28-7.25 (m, 2H), 7.23-7.20 (m, 3H), 4.54 (ABq, *J* = 16.2 Hz, 2H), 3.70 (s, 3H), 3.24 (ABq, *J* = 11.4 Hz, 2H), 2.87 (ABq, *J* = 14.4 Hz, 2H), 1.99 (s, 3H), 1.68-1.61 (m, 2H), 0.82 (t, *J* = 7.2 Hz, 3H). <sup>13</sup>C NMR (150 MHz, CDCl<sub>3</sub>) δ 170.52, 159.60, 136.90, 129.96, 128.10, 126.57, 70.45, 51.74, 47.73, 40.23, 28.90, 16.00, 12.31, 8.33. HRMS (ESI-TOF) Calcd for C<sub>16</sub>H<sub>23</sub>INO<sub>3</sub><sup>+</sup> [M+H]<sup>+</sup>: 404.0717, found: 404.0721.

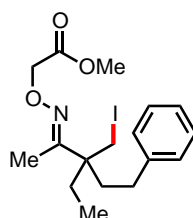

**(E)-methyl 2-(((3-ethyl-3-(iodomethyl)-5-phenylpentan-2-ylidene)amino)oxy)acetate (2g)**

Substrate **1g** was iodinated following the general iodination procedure except the reaction time is 3 hours. After purification by preparative thin-layer chromatography (Hexane : EtOAc = 5:1 as eluent), **2g** was obtained as a colorless oil (30.9 mg, 74%). <sup>1</sup>H NMR (600 MHz, CDCl<sub>3</sub>) δ 7.29-7.27 (m, 2H), 7.20-7.17 (m, 3H), 4.64 (s, 2H), 3.73 (s, 3H), 3.50 (ABqd, *J*<sub>1</sub> = 1.2 Hz, *J*<sub>2</sub> = 10.8 Hz, 2H), 2.47 (td, *J*<sub>1</sub> = 4.8 Hz, *J*<sub>2</sub> = 13.2 Hz, 1H), 2.28 (td, *J*<sub>1</sub> = 4.8 Hz, *J*<sub>2</sub> = 13.2 Hz, 1H), 1.94 (s, 3H), 1.93-1.88 (m, 1H), 1.76-1.70 (m, 1H), 1.69-1.64 (m, 1H), 1.58-1.52 (m, 1H), 0.74 (t, *J* = 7.2 Hz, 3H). <sup>13</sup>C NMR (150 MHz, CDCl<sub>3</sub>) δ 170.54, 159.74, 141.87, 128.42, 128.33, 125.90, 70.40, 51.76, 46.42, 38.82, 30.16, 28.97, 15.11, 11.53, 7.75. HRMS (ESI-TOF) Calcd for C<sub>17</sub>H<sub>25</sub>INO<sub>3</sub><sup>+</sup> [M+H]<sup>+</sup>: 418.0874, found: 418.0880.

**1 mmol Scale reaction:** Substrate **1g** (1.0 mmol, 291 mg), Pd(TFA)<sub>2</sub> (0.1 mmol, 33 mg), I<sub>2</sub> (1.0 mmol, 254 mg) and PhI(OAc)<sub>2</sub> (1.0 mmol, 322 mg) were weighed into a Schlenk tube (100 mL) with a magnetic stir bar under air. 1,4-Dioxane (12.5 mL) was added, and the tube

was sealed with a cap. The reaction mixture was stirred at 40 °C for 20 hours. Upon completion, the reaction mixture was cooled to room temperature and diluted with EtOAc. Then the reaction mixture was filtered through a plug of silicon gel and transferred to a round bottom flask (100 mL) with a magnetic stir bar. The solvent was evaporated under vacuum. Anhydrous MeOH (5 mL) was added to the mixture. SOCl<sub>2</sub> (3.0 mmol, 0.22 mL) was added dropwise at room temperature. The reaction mixture was stirred at room temperature for 1 hour. Upon completion, the reaction mixture was cooled to room temperature and the solvent was removed under vacuum. The resulting mixture was purified by chromatography using Hexane/EtOAc (20:1 to 10:1) mixtures as the eluent to give 325 mg of **2g** as a colorless oil (78% yield).

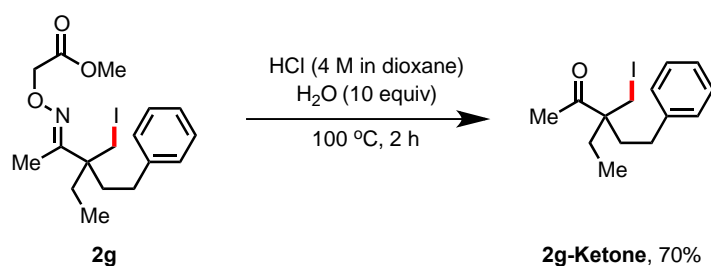

**The removal of auxiliary: 2g** (0.05 mmol, 20.9 mg) was weighed into a reaction vial (10 mL) with a magnetic stir bar under air. 9.0 μL of H<sub>2</sub>O (10 equiv) and 0.5 mL of HCl (4 M in dioxane) were added, and the vial was sealed with a cap. The reaction mixture was stirred at 100 °C for 2 hours. Upon completion, the reaction mixture was cooled to room temperature and the solvent was removed under vacuum. The resulting mixture was purified by preparative thin-layer chromatography by using toluene/EtOAc (100:1) as the eluent to give 11.6 mg of **2g-Ketone** (70% yield).

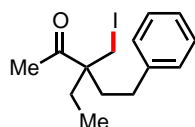

### 3-ethyl-3-(iodomethyl)-5-phenylpentan-2-one (**2g-Ketone**)

Colorless oil (11.6 mg, 70%). <sup>1</sup>H NMR (600 MHz, CDCl<sub>3</sub>) δ 7.30-7.28 (m, 2H), 7.22-7.17 (m, 3H), 3.50 (q, *J* = 10.8 Hz, 2H), 2.51-2.46 (m, 1H), 2.30-2.26 (m, 1H), 2.23 (s, 3H), 2.04-1.98 (m, 1H), 1.96-1.90 (m, 1H), 1.82-1.73 (m, 2H), 0.80 (t, *J* = 7.2 Hz, 3H). <sup>13</sup>C NMR (150 MHz, CDCl<sub>3</sub>) δ 209.25, 141.20, 128.55, 128.26, 126.19, 54.41, 38.04, 30.41, 28.63, 26.02, 12.15, 8.24. HRMS (ESI-TOF) Calcd for C<sub>14</sub>H<sub>20</sub>IO<sup>+</sup> [M+H]<sup>+</sup>: 331.0553, found: 331.0560.

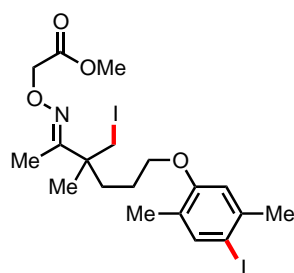



**(E)-methyl**

**2-(((6-(4-iodo-2,5-dimethylphenoxy)-3-(iodomethyl)-3-methylhexan-2-ylidene)amino)oxy)acetate (2h-mono)**

Substrate **1h** was iodinated following the general iodination procedure. After purification by preparative thin-layer chromatography (Toluene : EtOAc = 100:1 as eluent), **2h-mono** was obtained as a colorless oil (29.4 mg, 50%). <sup>1</sup>H NMR (600 MHz, CDCl<sub>3</sub>) δ 7.51 (s, 1H), 6.67 (s, 1H), 4.62 (s, 2H), 3.90-3.87 (m, 2H), 3.74 (s, 3H), 3.37 (ABq, *J* = 10.8 Hz, 2H), 2.37 (s, 3H), 2.13 (s, 3H), 1.91 (s, 3H), 1.84-1.80 (m, 1H), 1.68-1.63 (m, 3H), 1.22 (s, 3H). <sup>13</sup>C NMR (150 MHz, CDCl<sub>3</sub>) δ 170.58, 160.35, 157.27, 139.97, 139.43, 126.41, 112.58, 89.04, 70.44, 67.63, 51.76, 43.22, 34.37, 27.96, 24.59, 23.97, 18.20, 15.32, 11.12. HRMS (ESI-TOF) Calcd for C<sub>19</sub>H<sub>28</sub>I<sub>2</sub>NO<sub>4</sub><sup>+</sup> [M+H]<sup>+</sup>: 588.0102, found: 588.0106.

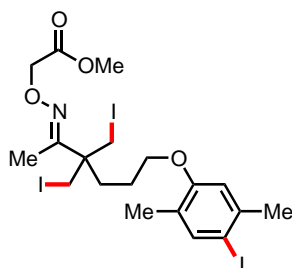

**(E)-methyl**

**2-(((6-(4-iodo-2,5-dimethylphenoxy)-3,3-bis(iodomethyl)hexan-2-ylidene)amino)oxy)acetate (2h-di)**

Substrate **1h** was iodinated following the general iodination procedure. After purification by preparative thin-layer chromatography (Toluene : EtOAc = 100:1 as eluent), **2h-di** was obtained as a colorless oil (21.4 mg, 30%). <sup>1</sup>H NMR (600 MHz, CDCl<sub>3</sub>) δ 7.51 (s, 1H), 6.67 (s, 1H), 4.64 (s, 2H), 3.89 (t, *J* = 6.0 Hz, 2H), 3.74 (s, 3H), 3.51 (ABq, *J* = 10.8 Hz, 4H), 2.36 (s, 3H), 2.13 (s, 3H), 1.97 (s, 3H), 1.86-1.83 (m, 2H), 1.66-1.62 (m, 2H). <sup>13</sup>C NMR (150 MHz, CDCl<sub>3</sub>) δ 170.30, 157.88, 157.12, 140.02, 139.48, 126.34, 112.48, 89.17, 70.62, 67.13, 51.84, 46.02, 31.95, 27.96, 25.19, 15.96, 15.38, 11.62. HRMS (ESI-TOF) Calcd for C<sub>19</sub>H<sub>27</sub>I<sub>3</sub>NO<sub>4</sub><sup>+</sup> [M+H]<sup>+</sup>: 713.9069, found: 713.9062.

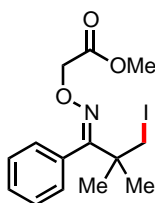

**(E)-methyl 2-(((3-iodo-2-(iodomethyl)-2-methyl-1-phenylpropylidene)amino)oxy)acetate (2i-mono)**

Substrate **1i** was iodinated following the general iodination procedure. After purification by preparative thin-layer chromatography (Hexane : Acetone = 20:1 as eluent), **2i-mono** was obtained as a colorless oil (11.3 mg, 30%). <sup>1</sup>H NMR (600 MHz, CDCl<sub>3</sub>) δ 7.43-7.40 (m, 2H), 7.38-7.35 (m, 1H), 7.25-7.23 (m, 2H), 4.55 (s, 2H), 3.75 (s, 3H), 3.36 (s, 2H), 1.28 (s, 6H). <sup>13</sup>C NMR (150 MHz, CDCl<sub>3</sub>) δ 170.52, 162.74, 132.95, 128.25, 128.08, 127.40, 70.63, 51.74, 40.74, 26.72, 19.84. HRMS (ESI-TOF) Calcd for C<sub>14</sub>H<sub>19</sub>INO<sub>3</sub><sup>+</sup> [M+H]<sup>+</sup>: 376.0404, found:

376.0400.

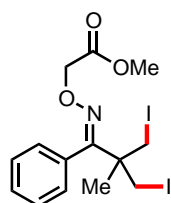

**(E)-methyl 2-(((3-iodo-2-(iodomethyl)-2-methyl-1-phenylpropylidene)amino)oxy)acetate (2i-di)**

Substrate **1i** was iodinated following the general iodination procedure. After purification by preparative thin-layer chromatography (Hexane : Acetone = 20:1 as eluent), **2i-di** was obtained as a colorless oil (21.5 mg, 43%). <sup>1</sup>H NMR (600 MHz, CDCl<sub>3</sub>) δ 7.45-7.42 (m, 2H), 7.40-7.38 (m, 1H), 7.34-7.32 (m, 2H), 4.57 (s, 2H), 3.76 (s, 3H), 3.49 (ABq, *J* = 10.8 Hz, 4H), 1.41 (s, 3H). <sup>13</sup>C NMR (150 MHz, CDCl<sub>3</sub>) δ 170.22, 159.30, 132.08, 128.79, 128.31, 127.38, 70.83, 51.87, 43.11, 24.88, 17.66. HRMS (ESI-TOF) Calcd for C<sub>14</sub>H<sub>18</sub>I<sub>2</sub>NO<sub>3</sub><sup>+</sup> [M+H]<sup>+</sup>: 501.9371, found: 501.9375.

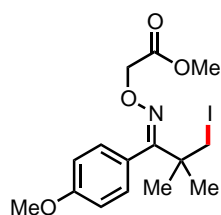

**(E)-methyl 2-(((3-iodo-1-(4-methoxyphenyl)-2,2-dimethylpropylidene)amino)oxy)acetate (2j-mono)**

Substrate **1j** was iodinated following the general iodination procedure. After purification by preparative thin-layer chromatography (Hexane : Acetone = 20:1 as eluent), **2j-mono** was obtained as a colorless oil (11.7 mg, 29%). <sup>1</sup>H NMR (600 MHz, CDCl<sub>3</sub>) δ 7.20-7.17 (m, 2H), 6.95-6.93 (m, 2H), 4.56 (s, 2H), 3.82 (s, 3H), 3.75 (s, 3H), 3.33 (s, 2H), 1.28 (s, 6H). <sup>13</sup>C NMR (150 MHz, CDCl<sub>3</sub>) δ 170.57, 162.62, 159.33, 128.76, 124.97, 113.58, 70.61, 55.15, 51.73, 40.92, 26.70, 20.02. HRMS (ESI-TOF) Calcd for C<sub>15</sub>H<sub>21</sub>INO<sub>4</sub><sup>+</sup> [M+H]<sup>+</sup>: 406.0510, found: 406.0515.

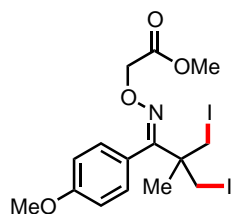

**(E)-methyl 2-(((3-iodo-2-(iodomethyl)-1-(4-methoxyphenyl)-2-methylpropylidene)amino)oxy)acetate (2j-di)**

Substrate **1j** was iodinated following the general iodination procedure. After purification by preparative thin-layer chromatography (Hexane : Acetone = 20:1 as eluent), **2j-di** was

obtained as a colorless oil (22.3 mg, 42%).  $^1\text{H}$  NMR (600 MHz,  $\text{CDCl}_3$ )  $\delta$  7.28-7.26 (m, 2H), 6.97-6.94 (m, 2H), 4.57 (s, 2H), 3.82 (s, 3H), 3.76 (s, 3H), 3.48 (ABq,  $J = 10.8$  Hz, 4H), 1.41 (s, 3H).  $^{13}\text{C}$  NMR (150 MHz,  $\text{CDCl}_3$ )  $\delta$  170.27, 159.72, 159.26, 128.79, 124.04, 113.76, 70.80, 55.18, 51.85, 43.30, 24.84, 17.79. HRMS (ESI-TOF) Calcd for  $\text{C}_{15}\text{H}_{20}\text{I}_2\text{NO}_4^+$   $[\text{M}+\text{H}]^+$ : 531.9476, found: 531.9471.

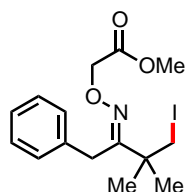

**(E)-methyl 2-(((4-iodo-3,3-dimethyl-1-phenylbutan-2-ylidene)amino)oxy)acetate (2k-mono)**

Substrate **1k** was iodinated following the general iodination procedure. After purification by preparative thin-layer chromatography (Hexane : Acetone = 10:1 as eluent), **2k-mono** was obtained as a colorless oil (9.7 mg, 25%).  $^1\text{H}$  NMR (600 MHz,  $\text{CDCl}_3$ )  $\delta$  7.30-7.27 (m, 4H), 7.22-7.18 (m, 1H), 4.66 (s, 2H), 3.82 (s, 2H), 3.78 (s, 3H), 3.34 (s, 2H), 1.18 (s, 6H).  $^{13}\text{C}$  NMR (150 MHz,  $\text{CDCl}_3$ )  $\delta$  170.56, 161.85, 136.30, 128.52, 128.47, 126.23, 70.58, 51.81, 40.89, 31.78, 26.69, 20.17. HRMS (ESI-TOF) Calcd for  $\text{C}_{15}\text{H}_{21}\text{INO}_3^+$   $[\text{M}+\text{H}]^+$ : 390.0561, found: 390.0569.

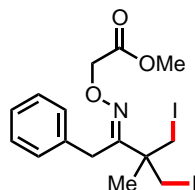

**(E)-methyl 2-(((4-iodo-3-(iodomethyl)-3-methyl-1-phenylbutan-2-ylidene)amino)oxy)acetate (2k-di)**

Substrate **1k** was iodinated following the general iodination procedure. After purification by preparative thin-layer chromatography (Hexane : Acetone = 10:1 as eluent), **2k-di** was obtained as a colorless oil (25.8 mg, 50%).  $^1\text{H}$  NMR (600 MHz,  $\text{CDCl}_3$ )  $\delta$  7.30-7.29 (m, 4H), 7.24-7.20 (m, 1H), 4.70 (s, 2H), 3.85 (s, 2H), 3.79 (s, 3H), 3.45 (ABq,  $J = 10.2$  Hz, 4H), 1.28 (s, 3H).  $^{13}\text{C}$  NMR (150 MHz,  $\text{CDCl}_3$ )  $\delta$  170.24, 158.72, 135.61, 128.64, 126.56, 70.82, 51.92, 43.41, 32.11, 24.85, 17.74. HRMS (ESI-TOF) Calcd for  $\text{C}_{15}\text{H}_{20}\text{I}_2\text{NO}_3^+$   $[\text{M}+\text{H}]^+$ : 515.9527, found: 515.9520.

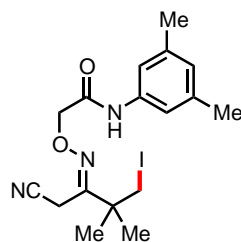

**(E)-2-(((1-cyano-4-iodo-3,3-dimethylbutan-2-ylidene)amino)oxy)-N-(3,5-dimethylphenyl)acetamide (2l)**

Substrate **1l** was iodinated following the general iodination procedure except the reaction temperature is 80 °C. After purification by preparative thin-layer chromatography (Hexane : EtOAc = 2:1 as eluent), **2l** was obtained as a colorless oil (21.4 mg, 50%). <sup>1</sup>H NMR (600 MHz, CDCl<sub>3</sub>) δ 8.06 (br s, 1H), 7.28 (s, 2H), 6.76 (s, 1H), 4.81 (s, 2H), 3.35 (s, 2H), 3.29 (s, 2H), 2.29 (s, 6H), 1.36 (s, 6H). <sup>13</sup>C NMR (150 MHz, CDCl<sub>3</sub>) δ 166.71, 154.24, 138.61, 137.06, 126.33, 117.78, 115.38, 74.28, 41.36, 25.44, 21.36, 15.99, 14.26. HRMS (ESI-TOF) Calcd for C<sub>17</sub>H<sub>23</sub>IN<sub>3</sub>O<sub>2</sub><sup>+</sup> [M+H]<sup>+</sup>: 428.0829, found: 428.0822.

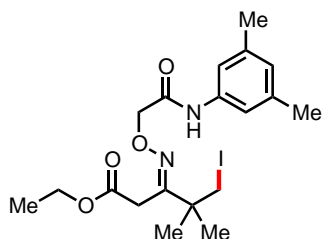

**(E)-ethyl**

**3-((2-((3,5-dimethylphenyl)amino)-2-oxoethoxy)imino)-5-iodo-4,4-dimethylpentanoate (2m-mono)**

Substrate **1m** was iodinated following the general iodination procedure. After purification by preparative thin-layer chromatography (Hexane : EtOAc = 5:1 as eluent), the iodinated products were obtained as 3.4:1 (mono:di) inseparable mixtures (**2m-mono**, 26.1 mg, 55%). <sup>1</sup>H NMR (600 MHz, CDCl<sub>3</sub>) δ 8.63 (br s, 1H), 7.40 (s, 2H), 6.75 (s, 1H), 4.68 (s, 2H), 4.24 (q, *J* = 7.2 Hz, 2H), 3.42 (s, 2H), 3.31 (s, 2H), 2.30 (s, 6H), 1.30 (t, *J* = 7.2 Hz, 3H), 1.28 (s, 6H). <sup>13</sup>C NMR (150 MHz, CDCl<sub>3</sub>) δ 169.29, 168.21, 157.74, 138.34, 137.86, 125.83, 117.73, 73.51, 61.83, 40.63, 31.77, 25.58, 21.43, 17.59, 14.04. HRMS (ESI-TOF) Calcd for C<sub>19</sub>H<sub>28</sub>IN<sub>2</sub>O<sub>4</sub><sup>+</sup> [M+H]<sup>+</sup>: 475.1088, found: 475.1084.

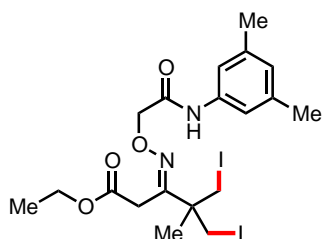

**(E)-ethyl**

**3-((2-((3,5-dimethylphenyl)amino)-2-oxoethoxy)imino)-5-iodo-4-(iodomethyl)-4-methylpentanoate (2m-di)**

Substrate **1m** was iodinated following the general iodination procedure. After purification by preparative thin-layer chromatography (Hexane : EtOAc = 5:1 as eluent), the iodinated products were obtained as 3.4:1 (mono:di) inseparable mixtures (**2m-di**, 10.2 mg, 17%). <sup>1</sup>H NMR (600 MHz, CDCl<sub>3</sub>) δ 8.60 (br s, 1H), 7.40 (s, 2H), 6.75 (s, 1H), 4.71 (s, 2H), 4.25 (q, *J* = 7.2 Hz, 2H), 3.47 (s, 2H), 3.46 (ABq, *J* = 10.8 Hz, 4H), 2.30 (s, 6H), 1.42 (s, 3H), 1.31 (t, *J* = 7.2 Hz, 3H). <sup>13</sup>C NMR (150 MHz, CDCl<sub>3</sub>) δ 168.80, 167.79, 154.89, 138.36, 137.76, 125.91, 117.72, 73.80, 62.06, 43.30, 32.34, 29.44, 24.00, 17.60, 15.43. HRMS (ESI-TOF) Calcd for C<sub>19</sub>H<sub>27</sub>I<sub>2</sub>N<sub>2</sub>O<sub>4</sub><sup>+</sup> [M+H]<sup>+</sup>: 601.0055, found: 601.0051.

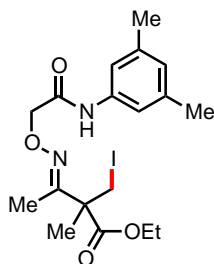

**(E)-ethyl**

**3-((2-((3,5-dimethylphenyl)amino)-2-oxoethoxy)imino)-2-(iodomethyl)-2-methylbutanoate (2n-mono)**

Substrate **1n** was iodinated following the general iodination procedure. After purification by preparative thin-layer chromatography (Hexane : EtOAc = 5:1 as eluent), the iodinated products were obtained as 4.0:1 (mono:di) inseparable mixtures (**2n-mono**, 24.8 mg, 54%). <sup>1</sup>H NMR (600 MHz, CDCl<sub>3</sub>) δ 7.75 (br s, 1H), 7.18 (s, 2H), 6.77 (s, 1H), 4.66 (ABq, *J* = 16.2 Hz, 2H), 4.28-4.17 (m, 2H), 3.59 (ABq, *J* = 10.2 Hz, 2H), 2.30 (s, 6H), 1.97 (s, 3H), 1.50 (s, 3H), 1.27 (t, *J* = 7.2 Hz, 3H). <sup>13</sup>C NMR of mixture (150 MHz, CDCl<sub>3</sub>) δ 170.70, 167.78, 167.42, 167.16, 158.93, 156.69, 138.71, 138.70, 136.87, 136.72, 126.43, 126.34, 117.83, 117.76, 73.49, 73.27, 62.96, 62.05, 56.71, 53.06, 22.05, 21.32, 14.12, 14.08, 12.74, 12.64, 11.48, 10.59. HRMS (ESI-TOF) Calcd for C<sub>18</sub>H<sub>26</sub>I<sub>1</sub>N<sub>2</sub>O<sub>4</sub><sup>+</sup> [M+H]<sup>+</sup>: 461.0932, found: 461.0939.

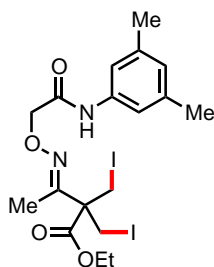

**(E)-ethyl**

**3-((2-((3,5-dimethylphenyl)amino)-2-oxoethoxy)imino)-2,2-bis(iodomethyl)butanoate (2n-di)**

Substrate **1n** was iodinated following the general iodination procedure. After purification by preparative thin-layer chromatography (Hexane : EtOAc = 5:1 as eluent), the iodinated products were obtained as 4.0:1 (mono:di) inseparable mixtures (**2n-di**, 8.2 mg, 14%). <sup>1</sup>H NMR (600 MHz, CDCl<sub>3</sub>) δ 7.68 (br s, 1H), 7.18 (s, 2H), 6.77 (s, 1H), 4.70 (s, 2H), 4.28-4.17 (m, 2H), 3.78 (ABq, *J* = 9.6 Hz, 4H), 2.29 (s, 6H), 1.98 (s, 3H), 1.31 (t, *J* = 7.2 Hz, 3H). <sup>13</sup>C NMR of mixture (150 MHz, CDCl<sub>3</sub>) δ 170.70, 167.78, 167.42, 167.16, 158.93, 156.69, 138.71, 138.70, 136.87, 136.72, 126.43, 126.34, 117.83, 117.76, 73.49, 73.27, 62.96, 62.05, 56.71, 53.06, 22.05, 21.32, 14.12, 14.08, 12.74, 12.64, 11.48, 10.59. HRMS (ESI-TOF) Calcd for C<sub>18</sub>H<sub>25</sub>I<sub>2</sub>N<sub>2</sub>O<sub>4</sub><sup>+</sup> [M+H]<sup>+</sup>: 586.9898, found: 586.9891.

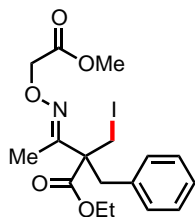

**(E)-ethyl 2-benzyl-2-(iodomethyl)-3-((2-methoxy-2-oxoethoxy)imino)butanoate (2o)**

Substrate **1o** was iodinated following the general iodination procedure. After purification by preparative thin-layer chromatography (Hexane : EtOAc = 5:1 as eluent), **2o** was obtained as 1.6:1 (**2o** : starting material) inseparable mixture (32.2 mg, 60%). <sup>1</sup>H NMR (600 MHz, CDCl<sub>3</sub>) δ 7.28-7.18 (m, 4H), 7.11-7.09 (m, 1H), 4.57 (ABq, *J* = 16.2 Hz, 2H), 4.27-4.18 (m, 2H), 3.73 (s, 3H), 3.41 (ABq, *J* = 11.4 Hz, 2H), 3.28 (ABq, *J* = 14.4 Hz, 2H), 1.93 (s, 3H), 1.28 (t, *J* = 7.2 Hz, 3H). <sup>13</sup>C NMR of mixture (150 MHz, CDCl<sub>3</sub>) δ 173.68, 170.47, 170.17, 170.13, 156.45, 136.99, 135.64, 130.42, 130.04, 128.26, 128.23, 127.94, 127.02, 126.53, 70.74, 70.52, 61.94, 61.06, 57.50, 53.74, 51.82, 51.73, 41.10, 37.69, 20.25, 14.07, 14.03, 13.26, 13.13, 9.90. HRMS (ESI-TOF) Calcd for C<sub>24</sub>H<sub>30</sub>IN<sub>2</sub>O<sub>4</sub><sup>+</sup> [M+H]<sup>+</sup>: 537.1245, found: 537.1240.

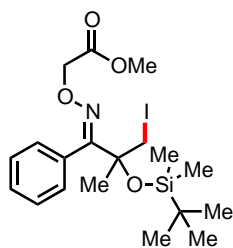

**(E)-methyl**

**6-(iodomethyl)-6,8,8,9,9-pentamethyl-5-phenyl-3,7-dioxa-4-aza-8-siladec-4-en-1-oate (2p-mono)**

Substrate **1p** was iodinated following the general iodination procedure except the reaction temperature is 80 °C. After purification by preparative thin-layer chromatography (Toluene : EtOAc = 100:1 as eluent), **2p-mono** was obtained as a colorless oil (22.1 mg, 45%). <sup>1</sup>H NMR (600 MHz, CDCl<sub>3</sub>) δ 7.40-7.34 (m, 5H), 4.58 (s, 2H), 3.76 (s, 3H), 3.42 (ABq, *J* = 9.6 Hz, 2H), 1.68 (s, 3H), 0.80 (s, 9H), 0.14 (s, 3H), 0.01 (s, 3H). <sup>13</sup>C NMR (150 MHz, CDCl<sub>3</sub>) δ 170.42, 161.17, 131.92, 128.45, 128.22, 127.78, 76.40, 70.82, 51.81, 27.11, 25.89, 18.37, 17.86, -1.80, -2.48. HRMS (ESI-TOF) Calcd for C<sub>19</sub>H<sub>31</sub>INO<sub>4</sub>Si<sup>+</sup> [M+H]<sup>+</sup>: 492.1062, found: 492.1066.

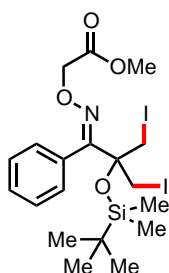

**(E)-methyl**

**6,6-bis(iodomethyl)-8,8,9,9-tetramethyl-5-phenyl-3,7-dioxa-4-aza-8-siladec-4-en-1-oate**

### (2p-di)

Substrate **1p** was iodinated following the general iodination procedure except the reaction temperature is 80 °C. After purification by preparative thin-layer chromatography (Toluene : EtOAc = 100:1 as eluent), **2p-di** was obtained as a colorless oil (12.3 mg, 20%). <sup>1</sup>H NMR (600 MHz, CDCl<sub>3</sub>) δ 7.46-7.44 (m, 2H), 7.42-7.38 (m, 3H), 4.63 (s, 2H), 3.78 (s, 3H), 3.69 (ABq, *J* = 10.2 Hz, 4H), 0.92 (s, 9H), 0.15 (s, 6H). <sup>13</sup>C NMR (150 MHz, CDCl<sub>3</sub>) δ 170.05, 156.26, 130.90, 129.13, 128.42, 128.02, 76.21, 71.10, 51.98, 26.02, 18.68, 15.86, -2.14. HRMS (ESI-TOF) Calcd for C<sub>19</sub>H<sub>30</sub>I<sub>2</sub>NO<sub>4</sub>Si<sup>+</sup> [M+H]<sup>+</sup>: 618.0028, found: 618.0020.

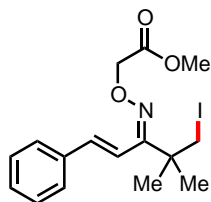

### methyl 2-(((E)-((E)-5-iodo-4,4-dimethyl-1-phenylpent-1-en-3-ylidene)amino)oxy)acetate (2q-mono)

Substrate **1q** was iodinated following the general iodination procedure. After purification by preparative thin-layer chromatography (Hexane : Acetone = 20:1 as eluent), **2q-mono** was obtained as a colorless oil (14.0 mg, 35%). <sup>1</sup>H NMR (600 MHz, CDCl<sub>3</sub>) δ 7.49-7.46 (m, 2H), 7.42 (d, *J* = 16.8 Hz, 1H), 7.37-7.34 (m, 2H), 7.32-7.29 (m, 1H), 6.56 (d, *J* = 16.8 Hz, 1H), 4.68 (s, 2H), 3.78 (s, 3H), 3.41 (s, 2H), 1.36 (s, 6H). <sup>13</sup>C NMR (150 MHz, CDCl<sub>3</sub>) δ 170.43, 158.24, 139.42, 136.52, 128.80, 128.69, 126.99, 116.05, 71.00, 51.86, 40.72, 26.84, 20.24. HRMS (ESI-TOF) Calcd for C<sub>16</sub>H<sub>21</sub>INO<sub>3</sub><sup>+</sup> [M+H]<sup>+</sup>: 402.0561, found: 402.0555.

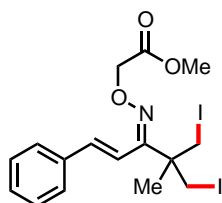

### methyl

### 2-(((E)-((E)-5-iodo-4-(iodomethyl)-4-methyl-1-phenylpent-1-en-3-ylidene)amino)oxy)acetate (2q-di)

Substrate **1q** was iodinated following the general iodination procedure. After purification by preparative thin-layer chromatography (Hexane : EtOAc = 20:1 as eluent), **2q-di** was obtained as a colorless oil (18.4 mg, 35%). <sup>1</sup>H NMR (600 MHz, CDCl<sub>3</sub>) δ 7.49-7.47 (m, 2H), 7.42 (d, *J* = 16.8 Hz, 1H), 7.38-7.36 (m, 2H), 7.33-7.31 (m, 1H), 6.49 (d, *J* = 16.8 Hz, 1H), 4.69 (s, 2H), 3.79 (s, 3H), 3.55 (ABq, *J* = 10.2 Hz, 4H), 1.52 (s, 3H). <sup>13</sup>C NMR (150 MHz, CDCl<sub>3</sub>) δ 170.16, 155.74, 140.17, 136.13, 129.06, 128.74, 127.08, 115.43, 71.17, 51.96, 43.13, 24.92, 17.60. HRMS (ESI-TOF) Calcd for C<sub>16</sub>H<sub>20</sub>I<sub>2</sub>NO<sub>3</sub><sup>+</sup> [M+H]<sup>+</sup>: 527.9527, found: 527.9521.

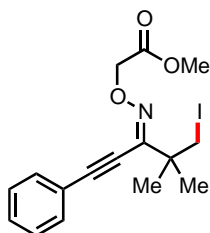

**(E)-methyl 2-(((5-iodo-4,4-dimethyl-1-phenylpent-1-yn-3-ylidene)amino)oxy)acetate (2r-mono)**

Substrate **1r** was iodinated following the general iodination procedure. After purification by preparative thin-layer chromatography (Hexane : EtOAc = 10:1 as eluent), the iodinated products were obtained as 1.9:1 (mono:di) inseparable mixtures (**2r-mono**, 20.7 mg, 52%). <sup>1</sup>H NMR (600 MHz, CDCl<sub>3</sub>) δ 7.55-7.53 (m, 2H), 7.38-7.34 (m, 3H), 4.73 (s, 2H), 3.78 (s, 3H), 3.45 (s, 2H), 1.39 (s, 6H). <sup>13</sup>C NMR (150 MHz, CDCl<sub>3</sub>) δ 169.70, 146.92, 132.15, 129.59, 128.40, 121.55, 101.62, 78.23, 71.19, 51.92, 40.46, 26.18, 16.11. HRMS (ESI-TOF) Calcd for C<sub>16</sub>H<sub>19</sub>INO<sub>3</sub><sup>+</sup> [M+H]<sup>+</sup>: 400.0404, found: 400.0400.

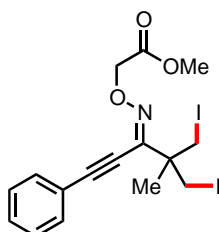

**(E)-methyl 2-(((3-iodo-2-(iodomethyl)-2-methyl-1-phenylpropylidene)amino)oxy)acetate (2r-di)**

Substrate **1r** was iodinated following the general iodination procedure. After purification by preparative thin-layer chromatography (Hexane : EtOAc = 10:1 as eluent), the iodinated products were obtained as 1.9:1 (mono:di) inseparable mixtures (**2r-di**, 8.4 mg, 16%). <sup>1</sup>H NMR (600 MHz, CDCl<sub>3</sub>) δ 7.56-7.54 (m, 2H), 7.43-7.39 (m, 3H), 4.75 (s, 2H), 3.79 (s, 3H), 3.59 (ABq, *J* = 10.2 Hz, 4H), 1.54 (s, 3H). <sup>13</sup>C NMR (150 MHz, CDCl<sub>3</sub>) δ 169.96, 143.74, 132.21, 129.87, 128.47, 121.15, 102.03, 77.69, 71.39, 52.02, 42.89, 24.71, 18.97. HRMS (ESI-TOF) Calcd for C<sub>16</sub>H<sub>18</sub>I<sub>2</sub>NO<sub>3</sub><sup>+</sup> [M+H]<sup>+</sup>: 525.9371, found: 525.9377.



## The Synthesis and Characterization of Palladacycle

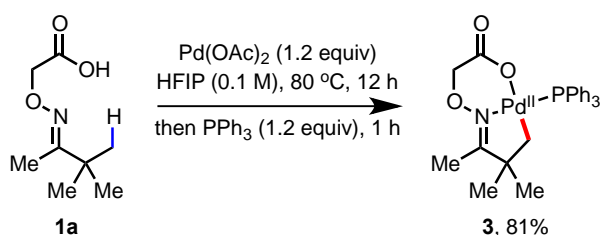

The General Procedures for the Palladacycle Synthesis: Substrate **1a** (0.1 mmol, 17.3 mg) and Pd(OAc)<sub>2</sub> (0.12 mmol, 27.0 mg) were weighed into a reaction vial (10 mL) with a magnetic stir bar under air. HFIP (1.0 mL) was added, and the vial was sealed with a cap. The reaction mixture was stirred at 80 °C for 12 hours. Upon completion, the reaction mixture was cooled to room temperature and PPh<sub>3</sub> (0.12 mmol, 31.4 mg) was added. The reaction was stirred for another 1 h at 80 °C. Upon completion, the reaction mixture was cooled to room temperature and diluted with EtOAc. Then the reaction mixture was filtered through a plug of celite. The solvent was removed under vacuum and the resulting mixture was purified by preparative thin-layer chromatography with EtOAc : MeOH = 10:1 as the eluent.

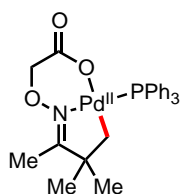

### Palladacycle (**3**)

Substrate **1a** was palladated following the general procedures. After purification by preparative thin-layer chromatography (EtOAc : MeOH = 10:1 as eluent), **3** was obtained as a white solid (43.7 mg, 81%). <sup>1</sup>H NMR (600 MHz, CDCl<sub>3</sub>) δ 7.60-7.56 (m, 6H), 7.46-7.39 (m, 9H), 4.57 (s, 2H), 1.95 (s, 3H), 1.57 (d, *J* = 3.6 Hz, 2H), 1.11 (s, 6H). <sup>13</sup>C NMR (150 MHz, CDCl<sub>3</sub>) δ 178.99, 172.54, 134.04 (d, *J* = 12.0 Hz), 130.60, 128.57, 128.49, 76.00, 50.26, 40.35, 28.65, 12.24. HRMS (ESI-TOF) Calcd for C<sub>26</sub>H<sub>28</sub>NO<sub>3</sub>PPd [M+H]<sup>+</sup>: 539.0842, found: 539.0850.

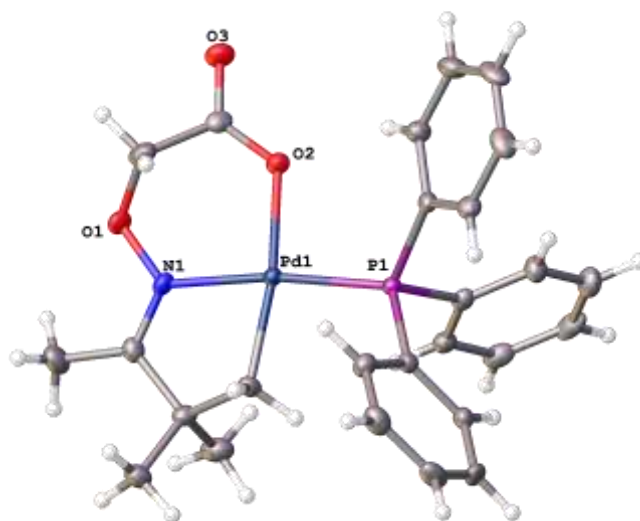

Table 1. Crystal data and structure refinement for palladacycle **3**.

Identification code ZRY-12-142-4  
Empirical formula C<sub>26</sub> H<sub>28</sub> N O<sub>3</sub> P Pd  
Formula weight 539.86  
Temperature 100.0 K  
Wavelength 0.71073 Å  
Crystal system Monoclinic  
Space group P 21/c  
Unit cell dimensions a = 13.5418(12) Å = 90°.  
b = 12.5775(14) Å = 110.150(3)°.  
c = 14.9257(17) Å = 90°.  
Volume 2386.6(4) Å<sup>3</sup>  
Z 4  
Density (calculated) 1.503 Mg/m<sup>3</sup>  
Absorption coefficient 0.872 mm<sup>-1</sup>  
F(000) 1104  
Crystal size 0.3 x 0.24 x 0.19 mm<sup>3</sup>  
Theta range for data collection 2.907 to 27.945°.  
Index ranges -14 ≤ h ≤ 17, -16 ≤ k ≤ 16, -19 ≤ l ≤ 16  
Reflections collected 24974  
Independent reflections 5704 [R(int) = 0.0292]  
Completeness to theta = 25.242° 99.7 %  
Absorption correction Semi-empirical from equivalents  
Max. and min. transmission 0.2622 and 0.2255  
Refinement method Full-matrix least-squares on F<sup>2</sup>  
Data / restraints / parameters 5704 / 0 / 292  
Goodness-of-fit on F<sup>2</sup> 1.035  
Final R indices [I > 2σ(I)] R1 = 0.0235, wR2 = 0.0563  
R indices (all data) R1 = 0.0313, wR2 = 0.0603  
Extinction coefficient n/a  
Largest diff. peak and hole 0.430 and -0.398 e.Å<sup>-3</sup>

Table 2. Atomic coordinates ( $\times 10^4$ ) and equivalent isotropic displacement parameters ( $\text{\AA}^2 \times 10^3$ ) for palladacycle **3**.  $U(\text{eq})$  is defined as one third of the trace of the orthogonalized  $U_{ij}$  tensor.

|       | x       | y       | z       | $U(\text{eq})$ |
|-------|---------|---------|---------|----------------|
| Pd(1) | 2380(1) | 4394(1) | 4072(1) | 14(1)          |
| P(1)  | 2951(1) | 5660(1) | 5194(1) | 14(1)          |
| O(1)  | 1864(1) | 2305(1) | 2964(1) | 25(1)          |
| O(2)  | 2476(1) | 3053(1) | 4983(1) | 21(1)          |
| N(1)  | 1840(1) | 3422(1) | 2919(1) | 18(1)          |
| O(3)  | 2738(1) | 1325(1) | 5254(1) | 30(1)          |
| C(16) | 2269(2) | 6364(2) | 6676(1) | 23(1)          |
| C(24) | 4103(2) | 8766(2) | 4245(1) | 28(1)          |
| C(21) | 3368(1) | 6901(1) | 4804(1) | 16(1)          |
| C(9)  | 4067(1) | 5295(1) | 6245(1) | 17(1)          |
| C(26) | 2928(2) | 7879(2) | 4892(1) | 20(1)          |
| C(20) | 921(2)  | 6073(2) | 5155(1) | 21(1)          |
| C(25) | 3293(2) | 8810(2) | 4606(1) | 27(1)          |
| C(15) | 1978(1) | 6060(1) | 5721(1) | 17(1)          |
| C(14) | 4020(2) | 4326(2) | 6684(1) | 23(1)          |
| C(10) | 4901(2) | 5987(2) | 6668(1) | 22(1)          |
| C(22) | 4168(2) | 6864(2) | 4412(1) | 21(1)          |
| C(2)  | 1232(2) | 5015(2) | 2094(1) | 20(1)          |
| C(18) | 465(2)  | 6712(2) | 6471(2) | 29(1)          |
| C(17) | 1508(2) | 6686(2) | 7050(2) | 29(1)          |
| C(1)  | 2071(2) | 5472(1) | 2999(1) | 20(1)          |
| C(4)  | 124(2)  | 5315(2) | 2083(2) | 30(1)          |
| C(19) | 161(2)  | 6403(2) | 5528(2) | 25(1)          |
| C(5)  | 1312(1) | 3814(2) | 2100(1) | 20(1)          |
| C(8)  | 2635(1) | 2109(1) | 4743(1) | 20(1)          |
| C(23) | 4543(2) | 7793(2) | 4142(2) | 26(1)          |
| C(11) | 5671(2) | 5726(2) | 7532(1) | 27(1)          |
| C(13) | 4797(2) | 4071(2) | 7546(2) | 29(1)          |
| C(7)  | 2747(2) | 1946(2) | 3764(2) | 25(1)          |
| C(3)  | 1392(2) | 5462(2) | 1194(1) | 25(1)          |
| C(6)  | 795(2)  | 3145(2) | 1242(2) | 31(1)          |
| C(12) | 5614(2) | 4775(2) | 7965(1) | 30(1)          |

Table 3. Bond lengths [ $\text{\AA}$ ] and angles [ $^\circ$ ] for palladacycle **3**.

---

|             |            |
|-------------|------------|
| Pd(1)-P(1)  | 2.2463(5)  |
| Pd(1)-O(2)  | 2.1424(13) |
| Pd(1)-N(1)  | 2.0303(15) |
| Pd(1)-C(1)  | 2.0289(18) |
| P(1)-C(21)  | 1.8227(18) |
| P(1)-C(9)   | 1.8228(18) |
| P(1)-C(15)  | 1.8235(18) |
| O(1)-N(1)   | 1.4068(19) |
| O(1)-C(7)   | 1.441(2)   |
| O(2)-C(8)   | 1.280(2)   |
| N(1)-C(5)   | 1.283(2)   |
| O(3)-C(8)   | 1.225(2)   |
| C(16)-H(16) | 0.9500     |
| C(16)-C(15) | 1.395(3)   |
| C(16)-C(17) | 1.390(3)   |
| C(24)-H(24) | 0.9500     |
| C(24)-C(25) | 1.379(3)   |
| C(24)-C(23) | 1.392(3)   |
| C(21)-C(26) | 1.393(2)   |
| C(21)-C(22) | 1.398(3)   |
| C(9)-C(14)  | 1.396(3)   |
| C(9)-C(10)  | 1.394(3)   |
| C(26)-H(26) | 0.9500     |
| C(26)-C(25) | 1.393(3)   |
| C(20)-H(20) | 0.9500     |
| C(20)-C(15) | 1.388(3)   |
| C(20)-C(19) | 1.392(3)   |
| C(25)-H(25) | 0.9500     |
| C(14)-H(14) | 0.9500     |
| C(14)-C(13) | 1.390(3)   |
| C(10)-H(10) | 0.9500     |
| C(10)-C(11) | 1.389(3)   |
| C(22)-H(22) | 0.9500     |
| C(22)-C(23) | 1.388(3)   |
| C(2)-C(1)   | 1.546(2)   |
| C(2)-C(4)   | 1.543(3)   |
| C(2)-C(5)   | 1.513(3)   |
| C(2)-C(3)   | 1.537(3)   |
| C(18)-H(18) | 0.9500     |
| C(18)-C(17) | 1.380(3)   |
| C(18)-C(19) | 1.379(3)   |
| C(17)-H(17) | 0.9500     |

C(1)-H(1A) 0.9900  
C(1)-H(1B) 0.9900  
C(4)-H(4A) 0.9800  
C(4)-H(4B) 0.9800  
C(4)-H(4C) 0.9800  
C(19)-H(19) 0.9500  
C(5)-C(6) 1.491(3)  
C(8)-C(7) 1.535(3)  
C(23)-H(23) 0.9500  
C(11)-H(11) 0.9500  
C(11)-C(12) 1.376(3)  
C(13)-H(13) 0.9500  
C(13)-C(12) 1.386(3)  
C(7)-H(7A) 0.9900  
C(7)-H(7B) 0.9900  
C(3)-H(3A) 0.9800  
C(3)-H(3B) 0.9800  
C(3)-H(3C) 0.9800  
C(6)-H(6A) 0.9800  
C(6)-H(6B) 0.9800  
C(6)-H(6C) 0.9800  
C(12)-H(12) 0.9500

O(2)-Pd(1)-P(1) 98.90(4)  
N(1)-Pd(1)-P(1) 171.69(5)  
N(1)-Pd(1)-O(2) 89.41(6)  
C(1)-Pd(1)-P(1) 92.24(5)  
C(1)-Pd(1)-O(2) 168.01(6)  
C(1)-Pd(1)-N(1) 79.46(7)  
C(21)-P(1)-Pd(1) 115.73(6)  
C(21)-P(1)-C(9) 103.57(8)  
C(21)-P(1)-C(15) 104.58(8)  
C(9)-P(1)-Pd(1) 115.67(6)  
C(9)-P(1)-C(15) 101.90(8)  
C(15)-P(1)-Pd(1) 113.75(6)  
N(1)-O(1)-C(7) 110.58(13)  
C(8)-O(2)-Pd(1) 122.12(12)  
O(1)-N(1)-Pd(1) 124.45(11)  
C(5)-N(1)-Pd(1) 119.72(13)  
C(5)-N(1)-O(1) 115.16(15)  
C(15)-C(16)-H(16) 119.9  
C(17)-C(16)-H(16) 119.9  
C(17)-C(16)-C(15) 120.12(18)  
C(25)-C(24)-H(24) 119.8

C(25)-C(24)-C(23) 120.38(18)  
C(23)-C(24)-H(24) 119.8  
C(26)-C(21)-P(1) 122.43(14)  
C(26)-C(21)-C(22) 119.22(17)  
C(22)-C(21)-P(1) 118.35(14)  
C(14)-C(9)-P(1) 117.80(14)  
C(10)-C(9)-P(1) 122.35(14)  
C(10)-C(9)-C(14) 119.55(17)  
C(21)-C(26)-H(26) 119.9  
C(21)-C(26)-C(25) 120.25(18)  
C(25)-C(26)-H(26) 119.9  
C(15)-C(20)-H(20) 119.7  
C(15)-C(20)-C(19) 120.56(18)  
C(19)-C(20)-H(20) 119.7  
C(24)-C(25)-C(26) 120.01(18)  
C(24)-C(25)-H(25) 120.0  
C(26)-C(25)-H(25) 120.0  
C(16)-C(15)-P(1) 121.62(14)  
C(20)-C(15)-P(1) 119.12(14)  
C(20)-C(15)-C(16) 119.26(17)  
C(9)-C(14)-H(14) 120.2  
C(13)-C(14)-C(9) 119.60(19)  
C(13)-C(14)-H(14) 120.2  
C(9)-C(10)-H(10) 119.8  
C(11)-C(10)-C(9) 120.36(19)  
C(11)-C(10)-H(10) 119.8  
C(21)-C(22)-H(22) 119.8  
C(23)-C(22)-C(21) 120.40(18)  
C(23)-C(22)-H(22) 119.8  
C(4)-C(2)-C(1) 109.72(17)  
C(5)-C(2)-C(1) 109.65(15)  
C(5)-C(2)-C(4) 108.11(16)  
C(5)-C(2)-C(3) 109.84(16)  
C(3)-C(2)-C(1) 110.19(16)  
C(3)-C(2)-C(4) 109.29(16)  
C(17)-C(18)-H(18) 119.6  
C(19)-C(18)-H(18) 119.6  
C(19)-C(18)-C(17) 120.86(19)  
C(16)-C(17)-H(17) 120.1  
C(18)-C(17)-C(16) 119.8(2)  
C(18)-C(17)-H(17) 120.1  
Pd(1)-C(1)-H(1A) 109.8  
Pd(1)-C(1)-H(1B) 109.8  
C(2)-C(1)-Pd(1) 109.33(12)

C(2)-C(1)-H(1A) 109.8  
C(2)-C(1)-H(1B) 109.8  
H(1A)-C(1)-H(1B) 108.3  
C(2)-C(4)-H(4A) 109.5  
C(2)-C(4)-H(4B) 109.5  
C(2)-C(4)-H(4C) 109.5  
H(4A)-C(4)-H(4B) 109.5  
H(4A)-C(4)-H(4C) 109.5  
H(4B)-C(4)-H(4C) 109.5  
C(20)-C(19)-H(19) 120.3  
C(18)-C(19)-C(20) 119.40(19)  
C(18)-C(19)-H(19) 120.3  
N(1)-C(5)-C(2) 113.87(16)  
N(1)-C(5)-C(6) 122.99(18)  
C(6)-C(5)-C(2) 123.11(17)  
O(2)-C(8)-C(7) 118.18(16)  
O(3)-C(8)-O(2) 124.55(18)  
O(3)-C(8)-C(7) 117.23(17)  
C(24)-C(23)-H(23) 120.1  
C(22)-C(23)-C(24) 119.71(19)  
C(22)-C(23)-H(23) 120.1  
C(10)-C(11)-H(11) 120.1  
C(12)-C(11)-C(10) 119.7(2)  
C(12)-C(11)-H(11) 120.1  
C(14)-C(13)-H(13) 119.9  
C(12)-C(13)-C(14) 120.1(2)  
C(12)-C(13)-H(13) 119.9  
O(1)-C(7)-C(8) 114.92(16)  
O(1)-C(7)-H(7A) 108.5  
O(1)-C(7)-H(7B) 108.5  
C(8)-C(7)-H(7A) 108.5  
C(8)-C(7)-H(7B) 108.5  
H(7A)-C(7)-H(7B) 107.5  
C(2)-C(3)-H(3A) 109.5  
C(2)-C(3)-H(3B) 109.5  
C(2)-C(3)-H(3C) 109.5  
H(3A)-C(3)-H(3B) 109.5  
H(3A)-C(3)-H(3C) 109.5  
H(3B)-C(3)-H(3C) 109.5  
C(5)-C(6)-H(6A) 109.5  
C(5)-C(6)-H(6B) 109.5  
C(5)-C(6)-H(6C) 109.5  
H(6A)-C(6)-H(6B) 109.5  
H(6A)-C(6)-H(6C) 109.5

H(6B)-C(6)-H(6C) 109.5  
C(11)-C(12)-C(13) 120.62(19)  
C(11)-C(12)-H(12) 119.7  
C(13)-C(12)-H(12) 119.7

---

Symmetry transformations used to generate equivalent atoms:



Table 4. Anisotropic displacement parameters ( $\text{\AA}^2 \times 10^3$ ) for palladacycle **3**. The anisotropic displacement factor exponent takes the form:  $-2 \left[ h^2 a^{*2} U_{11} + \dots + 2 h k a^* b^* U_{12} \right]$

|       | U11   | U22   | U33   | U23   | U13   | U12    |
|-------|-------|-------|-------|-------|-------|--------|
| Pd(1) | 17(1) | 12(1) | 14(1) | 0(1)  | 5(1)  | 1(1)   |
| P(1)  | 16(1) | 12(1) | 14(1) | 0(1)  | 5(1)  | 1(1)   |
| O(1)  | 36(1) | 13(1) | 23(1) | -2(1) | 7(1)  | -2(1)  |
| O(2)  | 29(1) | 15(1) | 21(1) | 2(1)  | 9(1)  | 1(1)   |
| N(1)  | 21(1) | 14(1) | 20(1) | -2(1) | 8(1)  | -1(1)  |
| O(3)  | 43(1) | 18(1) | 28(1) | 6(1)  | 11(1) | 1(1)   |
| C(16) | 25(1) | 25(1) | 21(1) | -3(1) | 9(1)  | 0(1)   |
| C(24) | 44(1) | 21(1) | 18(1) | 1(1)  | 10(1) | -11(1) |
| C(21) | 21(1) | 15(1) | 12(1) | 0(1)  | 4(1)  | -1(1)  |
| C(9)  | 19(1) | 18(1) | 15(1) | -1(1) | 5(1)  | 4(1)   |
| C(26) | 29(1) | 18(1) | 15(1) | -1(1) | 9(1)  | 2(1)   |
| C(20) | 23(1) | 19(1) | 22(1) | 3(1)  | 7(1)  | 1(1)   |
| C(25) | 47(1) | 13(1) | 20(1) | 0(1)  | 12(1) | 2(1)   |
| C(15) | 18(1) | 14(1) | 20(1) | 1(1)  | 10(1) | 0(1)   |
| C(14) | 26(1) | 22(1) | 21(1) | 2(1)  | 6(1)  | 2(1)   |
| C(10) | 21(1) | 22(1) | 21(1) | 0(1)  | 6(1)  | 2(1)   |
| C(22) | 23(1) | 18(1) | 22(1) | 0(1)  | 9(1)  | 0(1)   |
| C(2)  | 21(1) | 20(1) | 18(1) | 1(1)  | 4(1)  | 0(1)   |
| C(18) | 32(1) | 20(1) | 44(1) | 2(1)  | 26(1) | 3(1)   |
| C(17) | 36(1) | 28(1) | 27(1) | -3(1) | 17(1) | 2(1)   |
| C(1)  | 27(1) | 17(1) | 15(1) | 1(1)  | 6(1)  | -1(1)  |
| C(4)  | 26(1) | 30(1) | 34(1) | 8(1)  | 10(1) | 4(1)   |
| C(19) | 20(1) | 20(1) | 37(1) | 5(1)  | 12(1) | 1(1)   |
| C(5)  | 20(1) | 23(1) | 17(1) | -3(1) | 6(1)  | -3(1)  |
| C(8)  | 16(1) | 18(1) | 22(1) | 2(1)  | 3(1)  | 0(1)   |
| C(23) | 28(1) | 29(1) | 23(1) | 0(1)  | 11(1) | -8(1)  |
| C(11) | 19(1) | 39(1) | 21(1) | -5(1) | 4(1)  | 0(1)   |
| C(13) | 34(1) | 28(1) | 22(1) | 9(1)  | 8(1)  | 8(1)   |
| C(7)  | 30(1) | 16(1) | 31(1) | 2(1)  | 13(1) | 6(1)   |
| C(3)  | 29(1) | 26(1) | 19(1) | 3(1)  | 6(1)  | -1(1)  |
| C(6)  | 41(1) | 29(1) | 19(1) | -3(1) | 4(1)  | -8(1)  |
| C(12) | 24(1) | 46(1) | 18(1) | 7(1)  | 3(1)  | 11(1)  |

Table 5. Hydrogen coordinates (  $\times 10^4$ ) and isotropic displacement parameters ( $\text{\AA}^2 \times 10^3$ ) for palladacycle **3**.

|       | x    | y    | z    | U(eq) |
|-------|------|------|------|-------|
| H(16) | 2989 | 6352 | 7071 | 28    |
| H(24) | 4362 | 9403 | 4065 | 33    |
| H(26) | 2376 | 7912 | 5148 | 25    |
| H(20) | 716  | 5854 | 4507 | 26    |
| H(25) | 2985 | 9474 | 4660 | 32    |
| H(14) | 3460 | 3843 | 6396 | 28    |
| H(10) | 4944 | 6641 | 6365 | 26    |
| H(22) | 4457 | 6198 | 4330 | 25    |
| H(18) | -52  | 6947 | 6725 | 34    |
| H(17) | 1707 | 6887 | 7702 | 34    |
| H(1A) | 1811 | 6140 | 3188 | 24    |
| H(1B) | 2723 | 5633 | 2866 | 24    |
| H(4A) | 40   | 5079 | 2678 | 45    |
| H(4B) | -407 | 4968 | 1541 | 45    |
| H(4C) | 34   | 6088 | 2023 | 45    |
| H(19) | -560 | 6415 | 5137 | 30    |
| H(23) | 5097 | 7766 | 3889 | 31    |
| H(11) | 6235 | 6203 | 7821 | 33    |
| H(13) | 4769 | 3413 | 7849 | 34    |
| H(7A) | 3385 | 2326 | 3757 | 30    |
| H(7B) | 2856 | 1179 | 3680 | 30    |
| H(3A) | 1443 | 6238 | 1239 | 38    |
| H(3B) | 794  | 5261 | 630  | 38    |
| H(3C) | 2041 | 5171 | 1142 | 38    |
| H(6A) | 1298 | 2991 | 919  | 47    |
| H(6B) | 189  | 3527 | 804  | 47    |
| H(6C) | 557  | 2477 | 1437 | 47    |
| H(12) | 6138 | 4598 | 8557 | 36    |

## Measurement of the Kinetic Isotope Effect

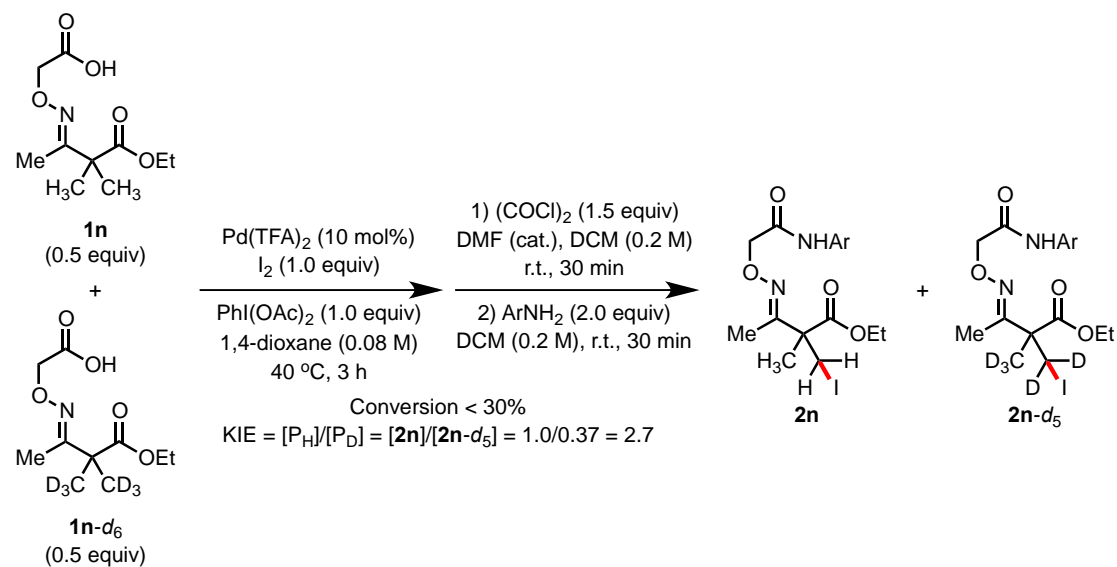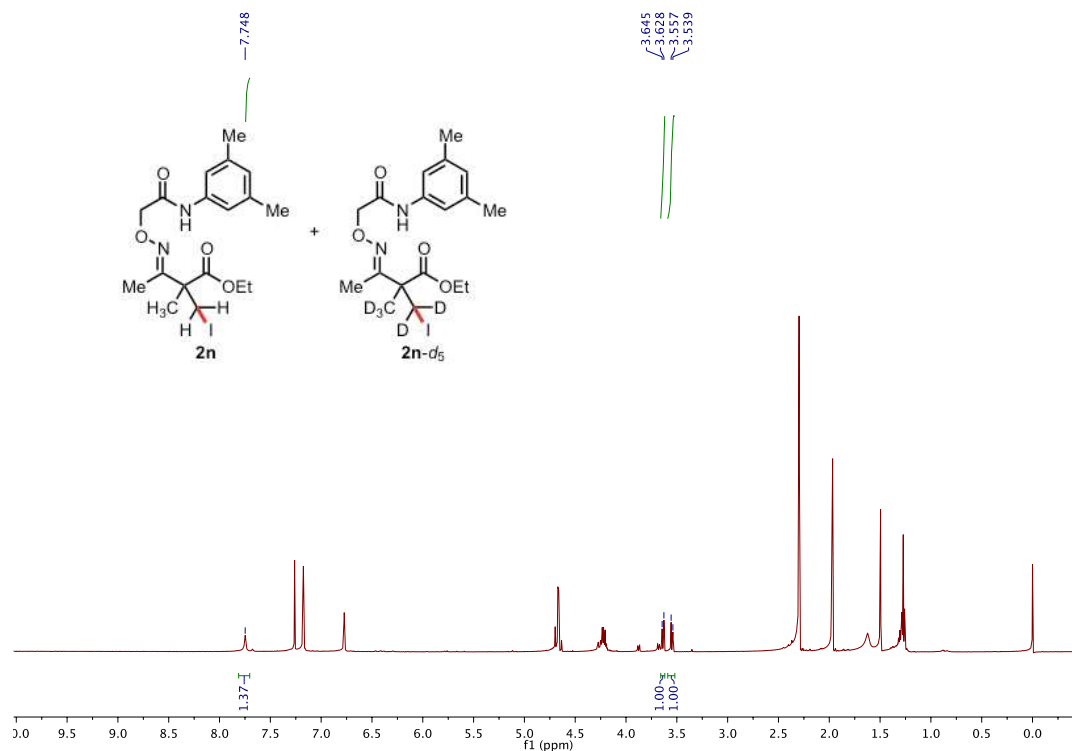

**General Procedures for the Intermolecular KIE Experiment:** Substrate **1n** (0.05 mmol, 11.6 mg), **1n-d<sub>6</sub>** (0.05 mmol, 11.9 mg), Pd(TFA)<sub>2</sub> (0.01 mmol, 3.3 mg), I<sub>2</sub> (0.10 mmol, 25.4 mg) and PhI(OAc)<sub>2</sub> (0.10 mmol, 32.2 mg) were weighed into a reaction vial (10 mL) with a magnetic stir bar under air. 1,4-Dioxane (1.25 mL) was added, and the vial was sealed with a cap. The reaction mixture was stirred at 40 °C for 3 hours. Upon completion, the reaction mixture was cooled to room temperature and diluted with EtOAc. Then the reaction mixture was filtered through a plug of silicon gel and transferred to a reaction vial (10 mL) with a magnetic stir bar. The solvent was evaporated under vacuum. Anhydrous DCM (0.5 mL) and DMF (ca. 10 μL) were added to the mixture. (COCl)<sub>2</sub> (0.15 mmol, 13 μL) was added

dropwise at room temperature. The vial was sealed with a cap. The reaction mixture was stirred at room temperature for 30 min before excess (COCl)<sub>2</sub> and solvent were evaporated. To the mixture was added anhydrous DCM (0.5 mL), followed by the dropwise addition of 3,5-dimethylaniline (0.2 mmol, 25 μL) to the mixture at room temperature. The vial was sealed with a cap. The reaction mixture was stirred at room temperature for 30 min. Upon completion, the reaction mixture was diluted with EtOAc. Then the reaction mixture was filtered through a plug of celite and the solvent was removed under vacuum. The resulting mixture was purified by preparative thin-layer chromatography. The ratio (KIE value) of **2n** to **2n-d<sub>5</sub>** was determined by <sup>1</sup>H NMR analysis.

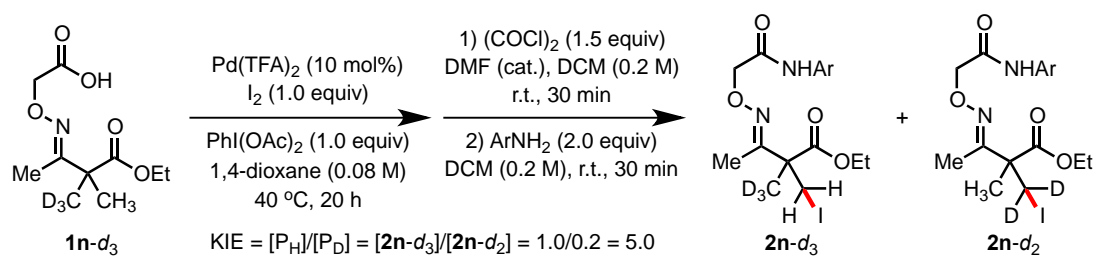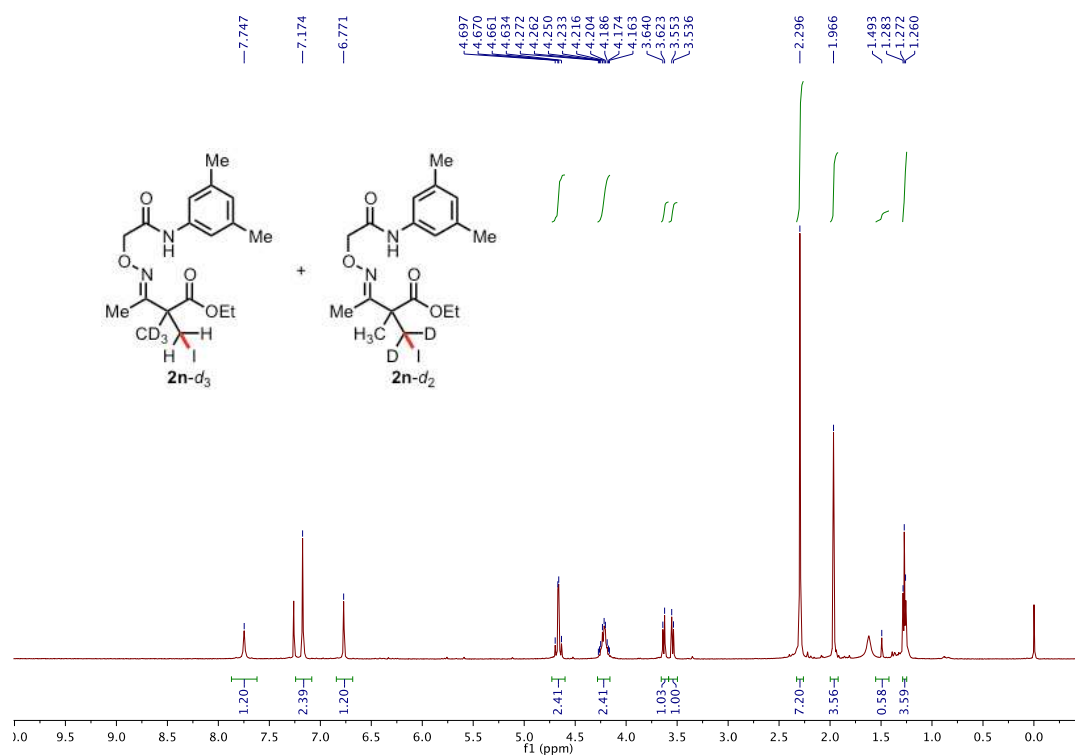

**General Procedures for the Intramolecular KIE Experiment:** Substrate **1n-d<sub>3</sub>** (0.10 mmol, 23.4 mg), Pd(TFA)<sub>2</sub> (0.01 mmol, 3.3 mg), I<sub>2</sub> (0.10 mmol, 25.4 mg) and PhI(OAc)<sub>2</sub> (0.10 mmol, 32.2 mg) were weighed into a reaction vial (10 mL) with a magnetic stir bar under air. 1,4-Dioxane (1.25 mL) was added, and the vial was sealed with a cap. The reaction mixture was stirred at 40 °C for 20 hours. Upon completion, the reaction mixture was cooled to room temperature and diluted with EtOAc. Then the reaction mixture was filtered through a plug of silicon gel and transferred to a reaction vial (10 mL) with a magnetic stir bar. The solvent was evaporated under vacuum. Anhydrous DCM (0.5 mL) and DMF (ca. 10 μL) were

added to the mixture.  $(\text{COCl})_2$  (0.15 mmol, 13  $\mu\text{L}$ ) was added dropwise at room temperature. The vial was sealed with a cap. The reaction mixture was stirred at room temperature for 30 min before excess  $(\text{COCl})_2$  and solvent were evaporated. To the mixture was added anhydrous DCM (0.5 mL), followed by the dropwise addition of 3,5-dimethylaniline (0.2 mmol, 25 $\mu\text{L}$ ) to the mixture at room temperature. The vial was sealed with a cap. The reaction mixture was stirred at room temperature for 30 min. Upon completion, the reaction mixture was diluted with EtOAc. Then the reaction mixture was filtered through a plug of celite and the solvent was removed under vacuum. The resulting mixture was purified by preparative thin-layer chromatography. The ratio (KIE value) of **2n-d<sub>3</sub>** to **2n-d<sub>2</sub>** was determined by  $^1\text{H}$  NMR analysis.

## References

- (1) (a) Peter, M.; Gleiter, R.; Rominger, F.; Oeser, T. *Eur. J. Org. Chem.* **2004**, 3212. (b) Maruyama, K.; Noguchi-Yachide, T.; Sugita, K.; Hashimoto, Y.; Ishikawa, M. *Bioorg. Med. Chem. Lett.* **2010**, *20*, 6661.
- (2) Yang, Q.-L.; Li, Y.-Q.; Ma, C.; Fang, P.; Zhang, X.-J.; Mei, T.-S. *J. Am. Chem. Soc.* **2017**, *139*, 3293.
- (3) Ushijima, S.; Dohi, S.; Moriyama, K.; Togo, H. *Tetrahedron*, **2012**, *68*, 1436.
- (4) Ohkuma, T.; Sandoval, C. A.; Srinivasan, R.; Lin, Q.; Wei, Y.; Muniz, K.; Noyori, R. *J. Am. Chem. Soc.* **2005**, *127*, 8288.
- (5) Li, X.; Li, L.; Tang, Y.; Zhong, L.; Cun, L.; Zhu, J.; Liao, J.; Deng, J. *J. Org. Chem.* **2010**, *75*, 2981.
- (6) Yin, W.; He, H.; Zhang, Y.; Luo, D.; He, H. *Synthesis* **2014**, *46*, 2617.

## <sup>1</sup>H and <sup>13</sup>C NMR Spectra

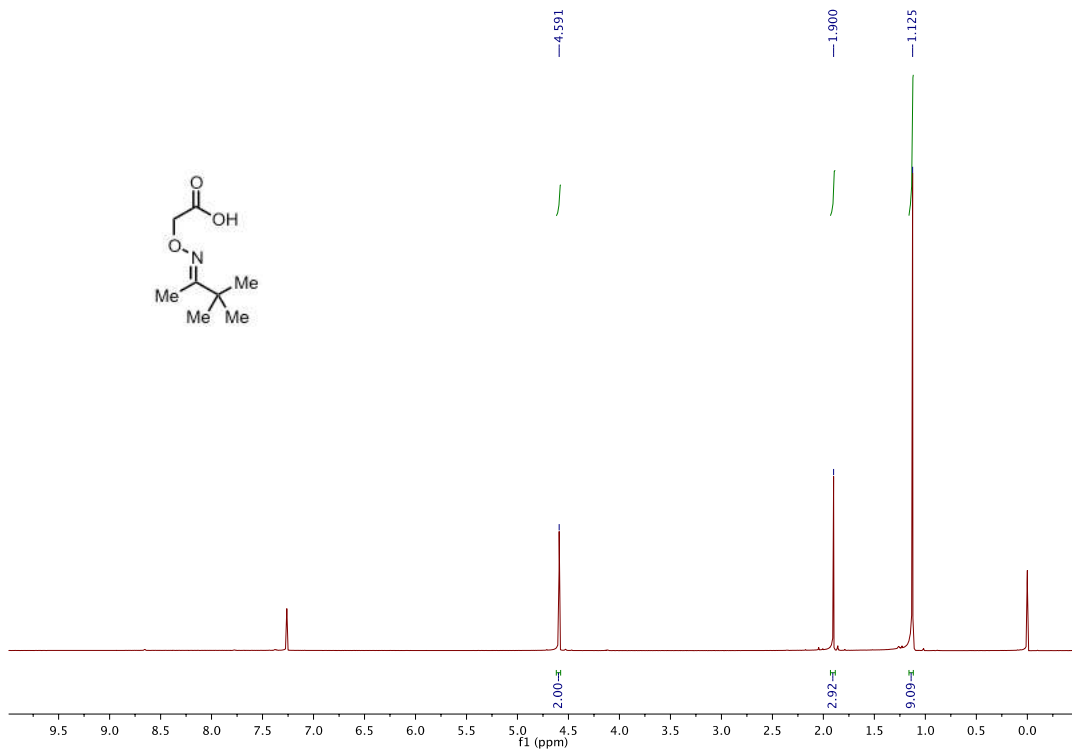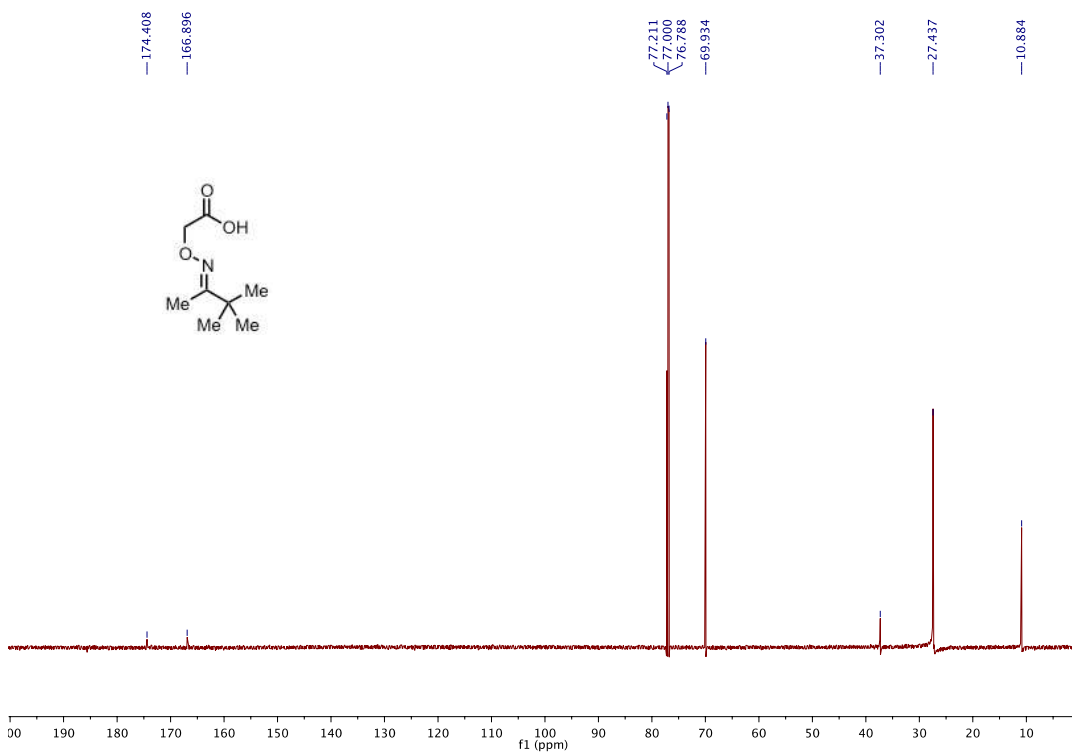

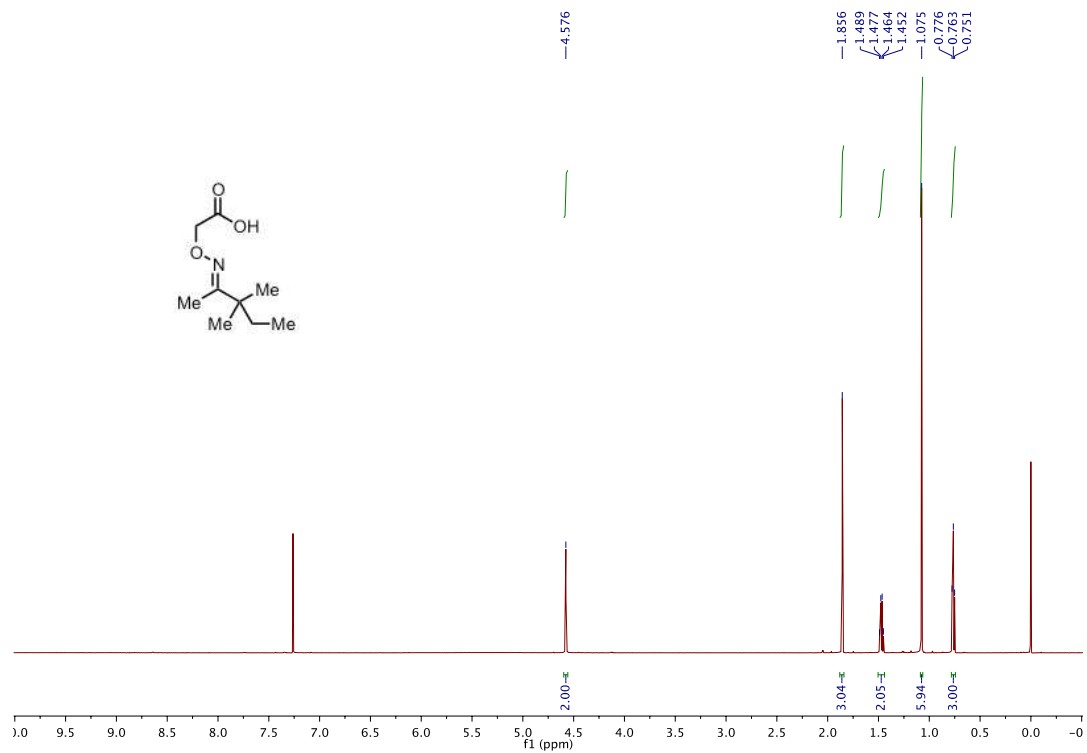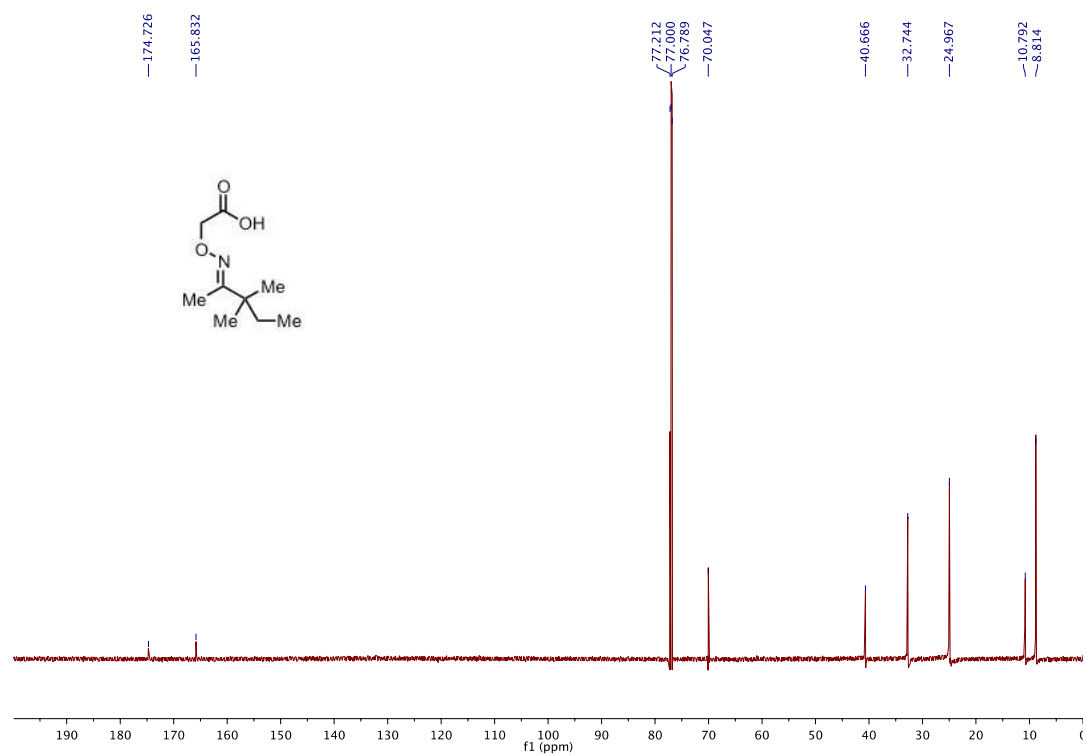



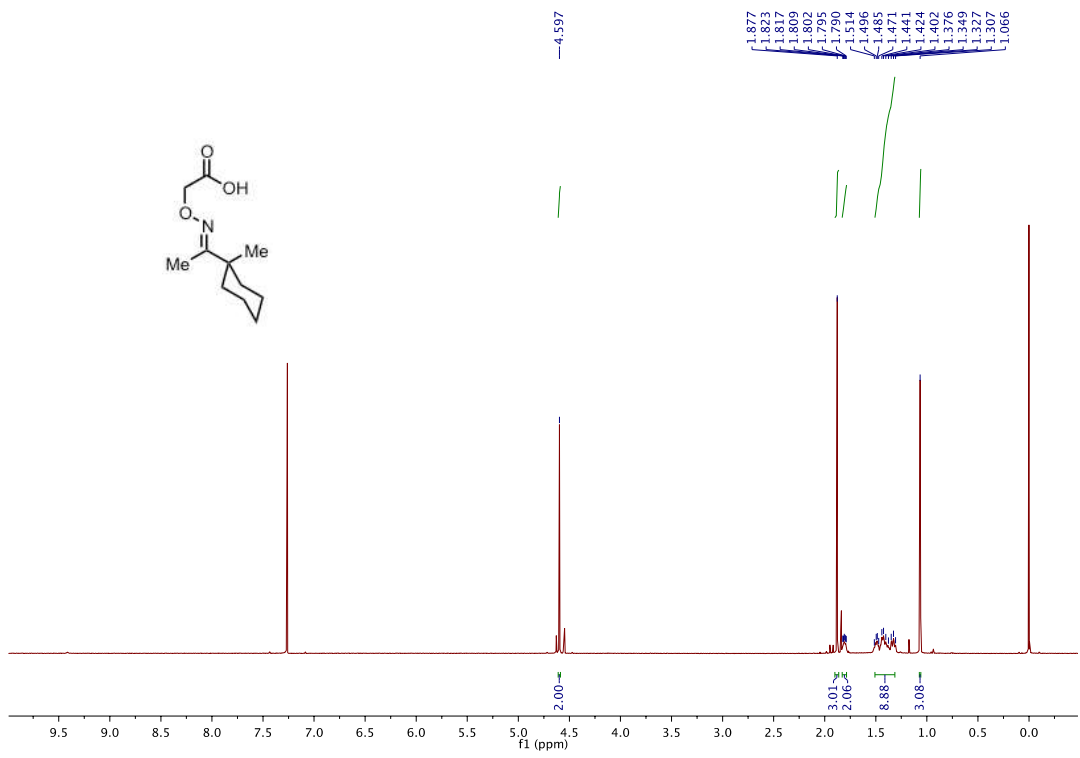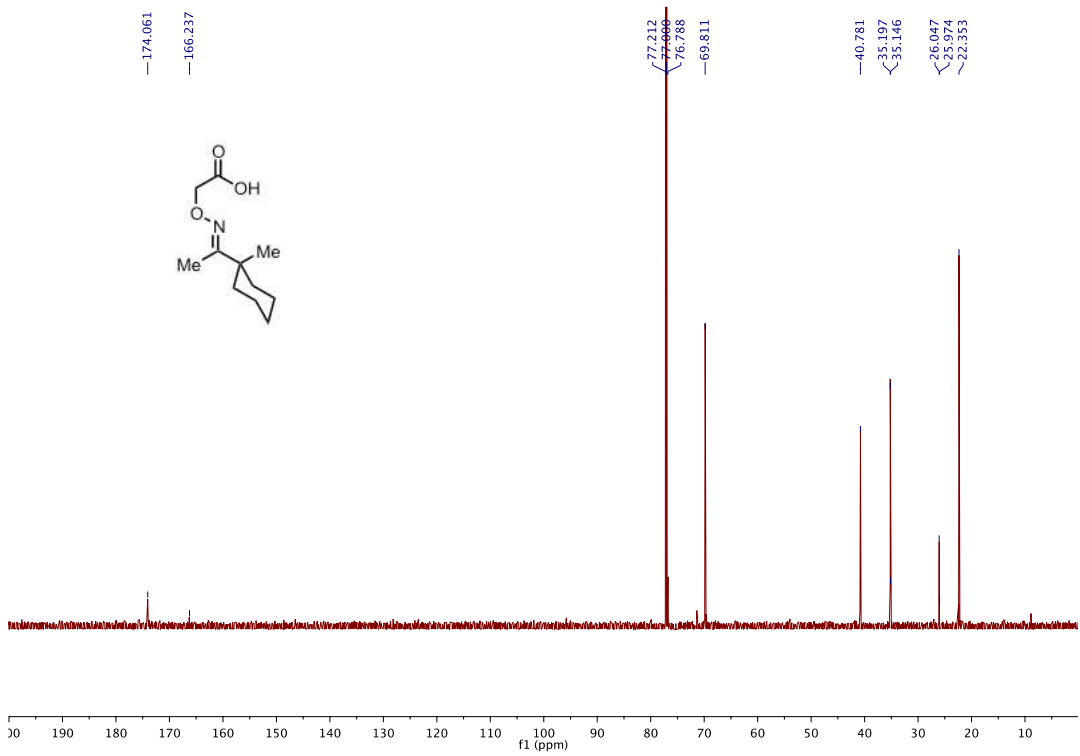

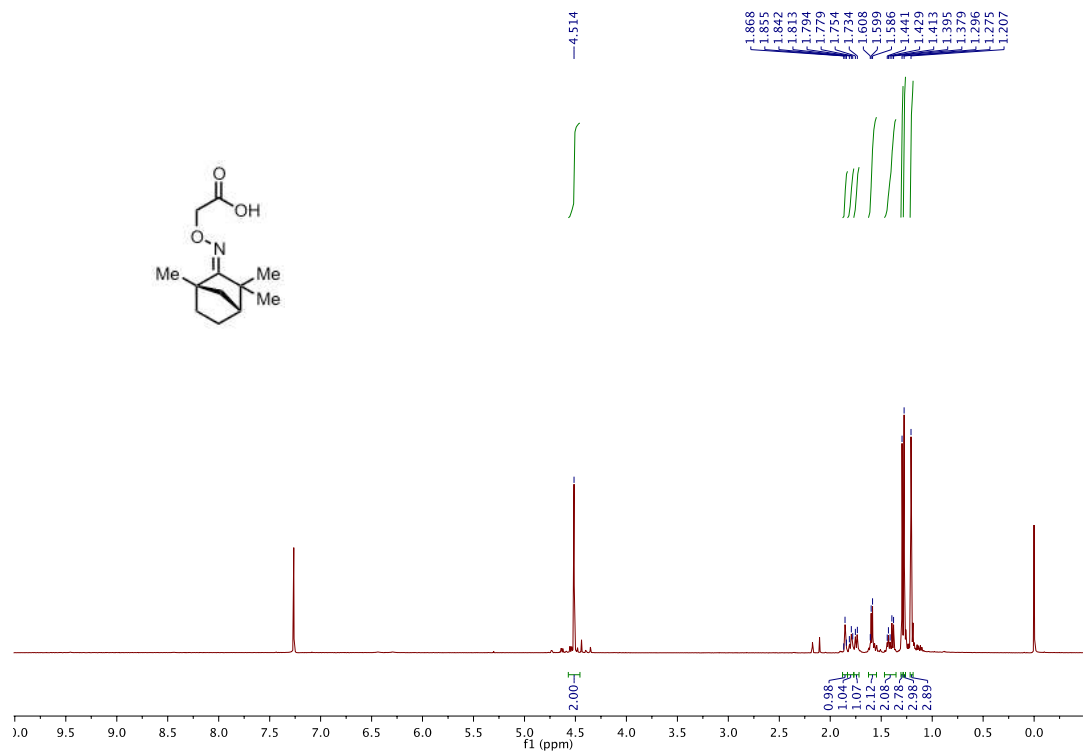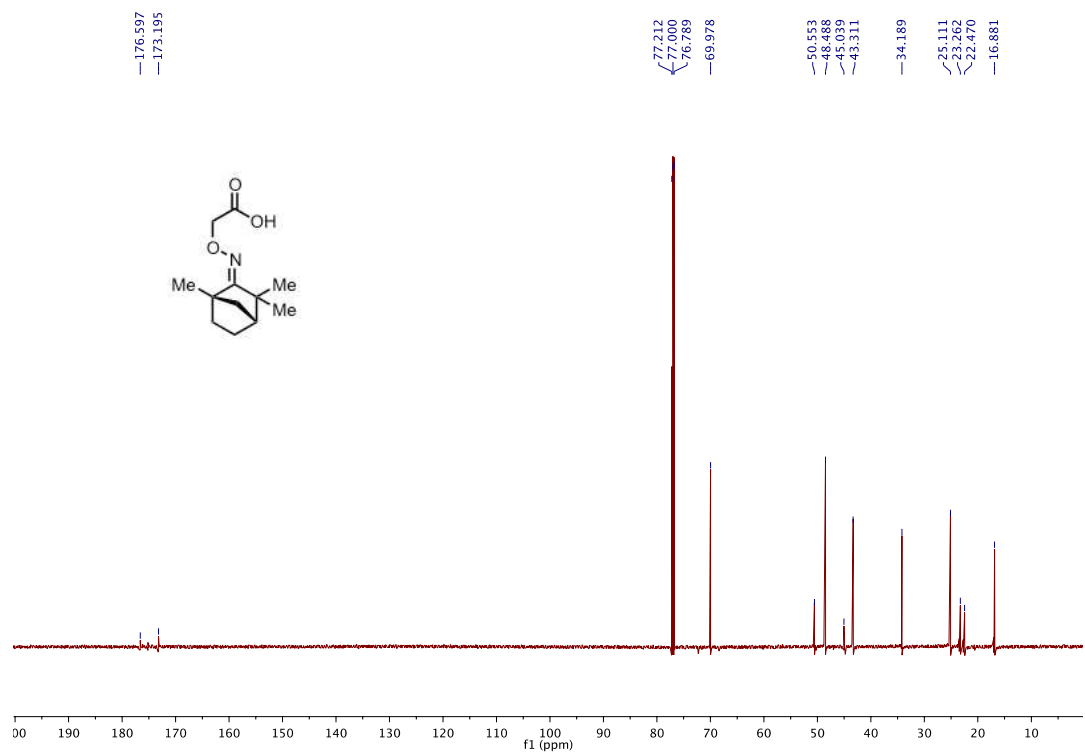

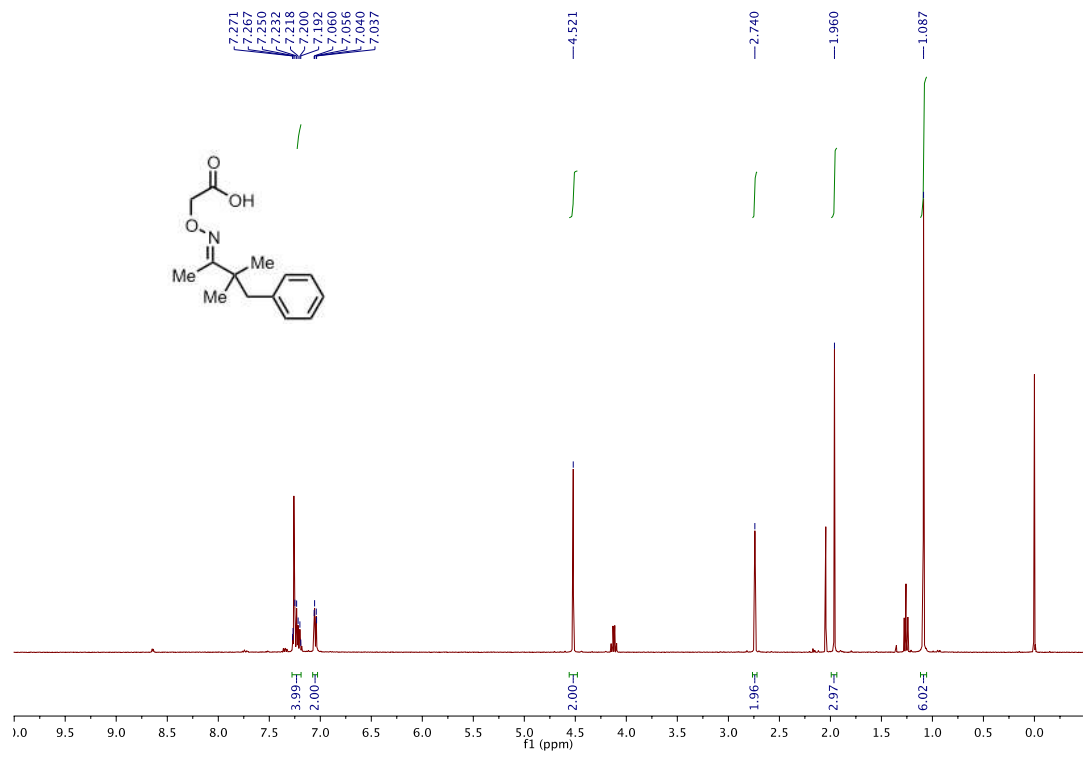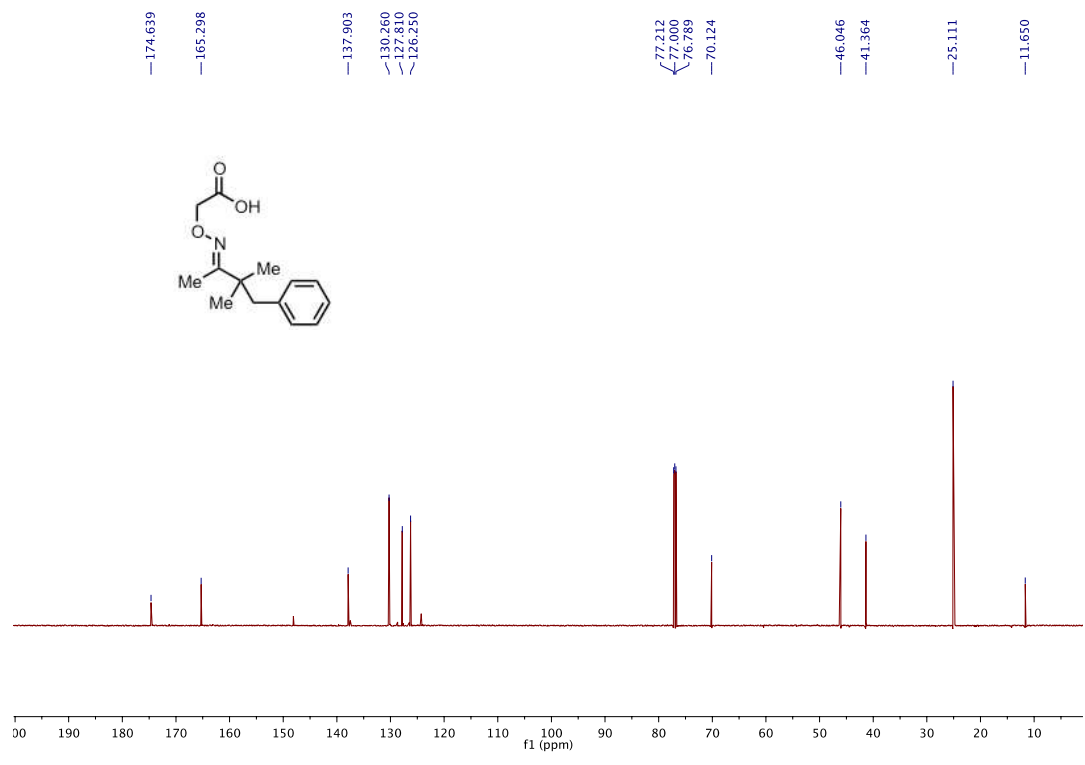

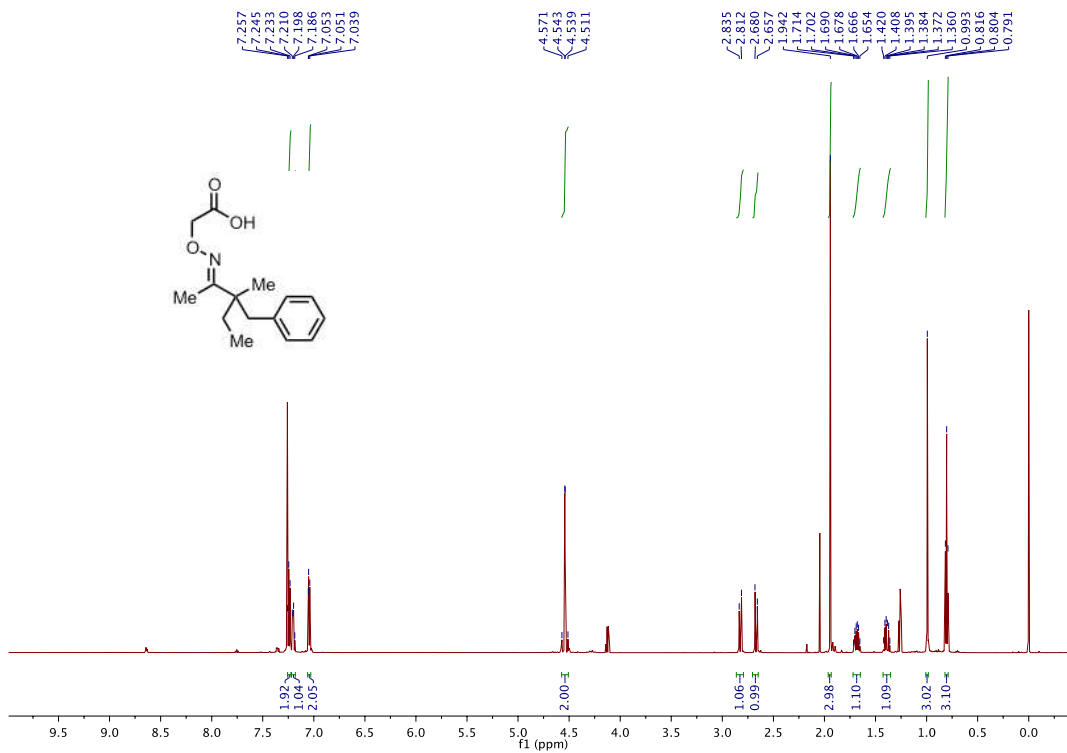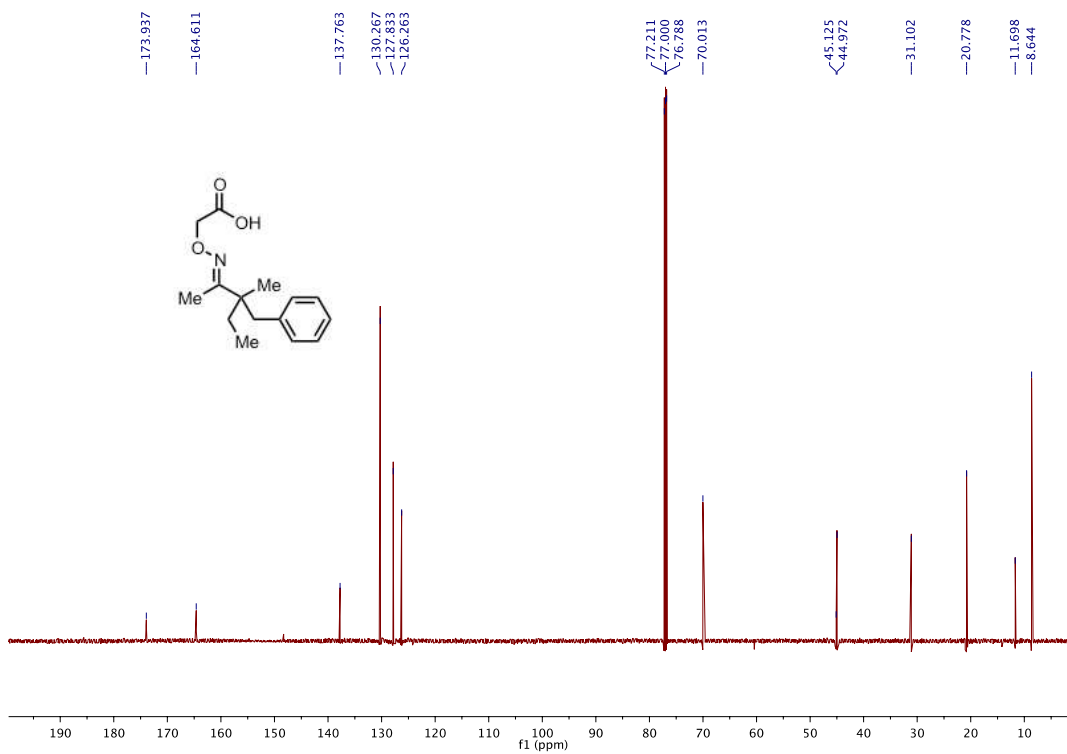

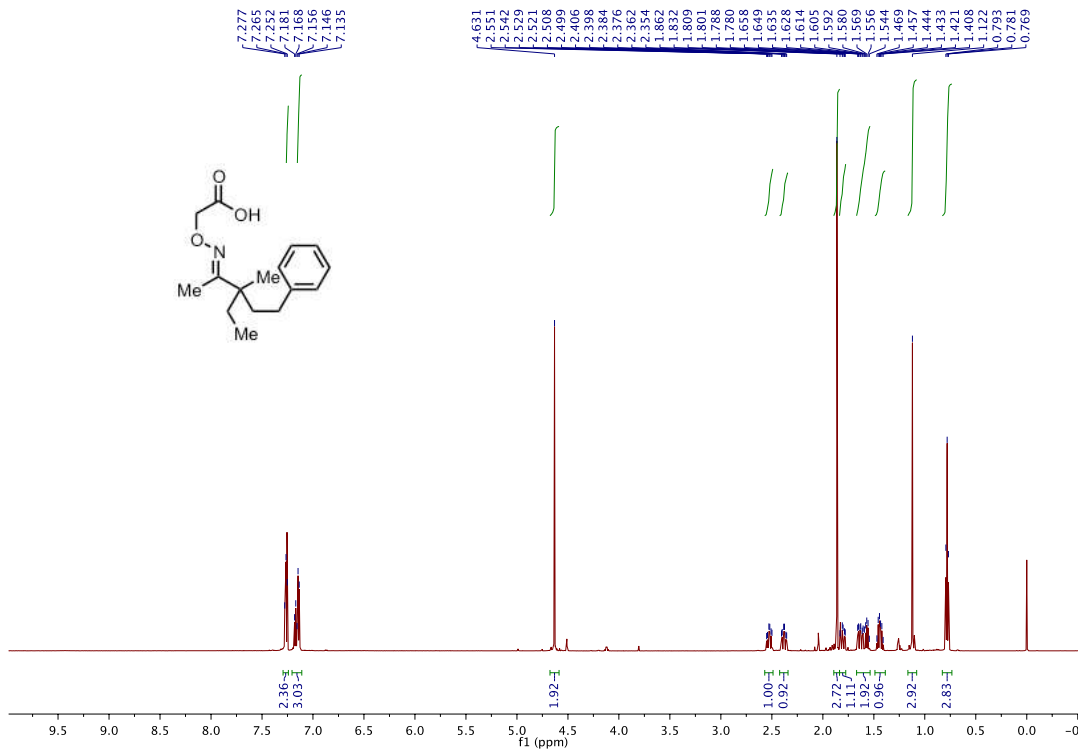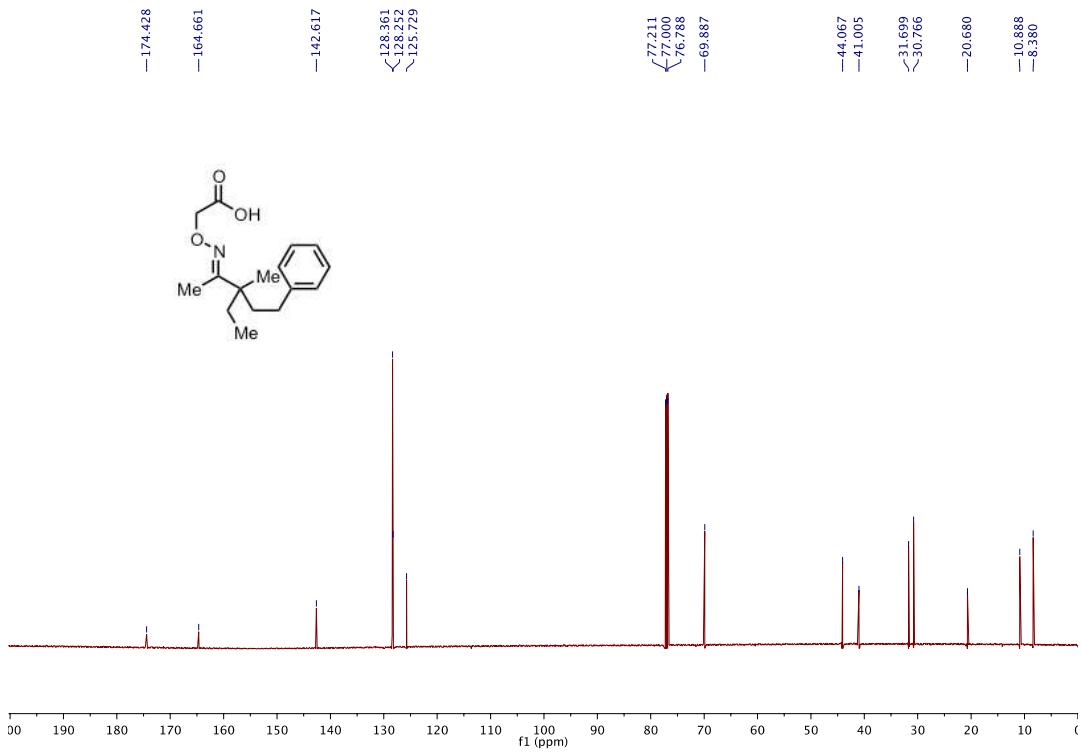

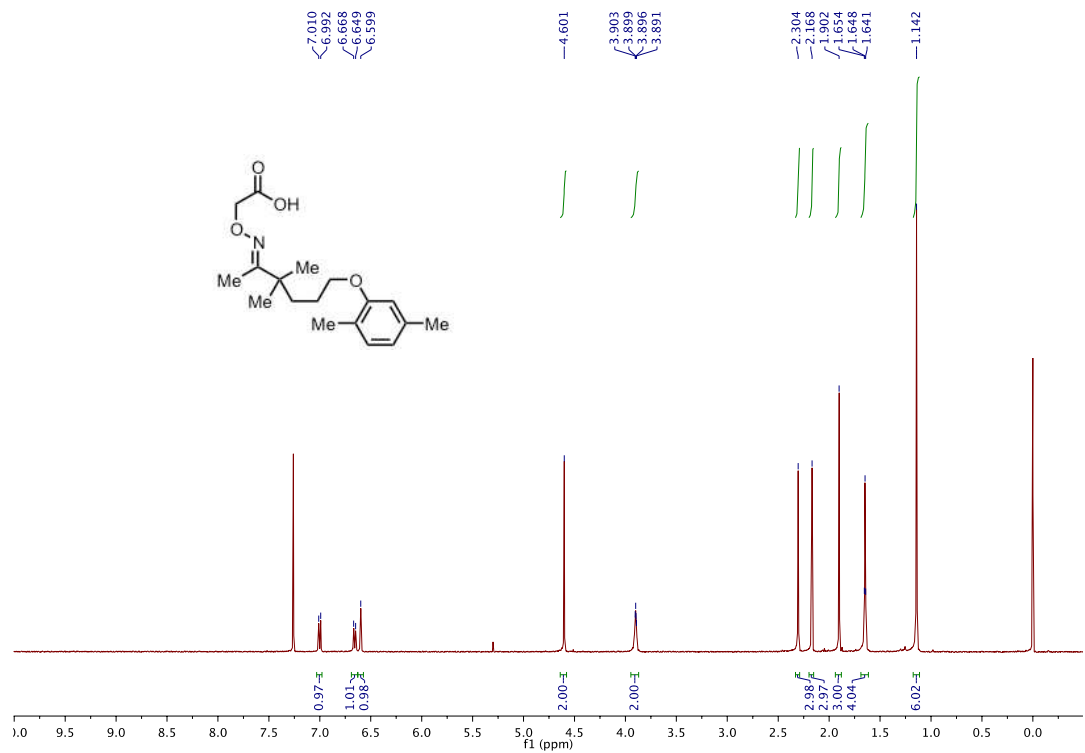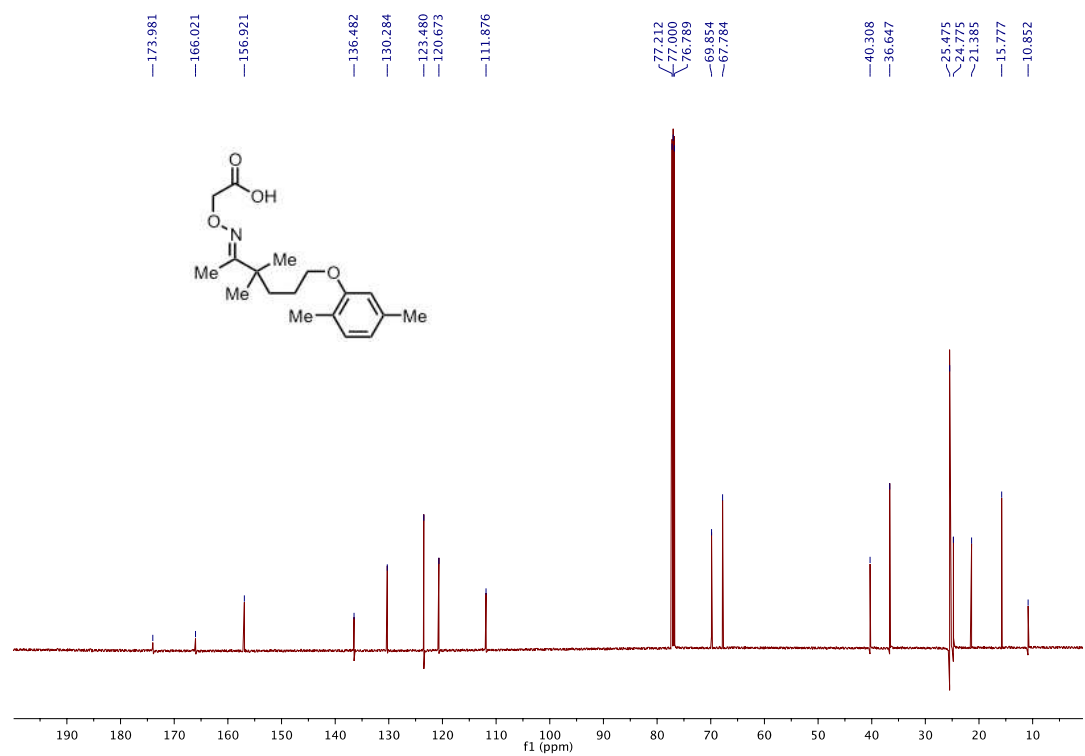

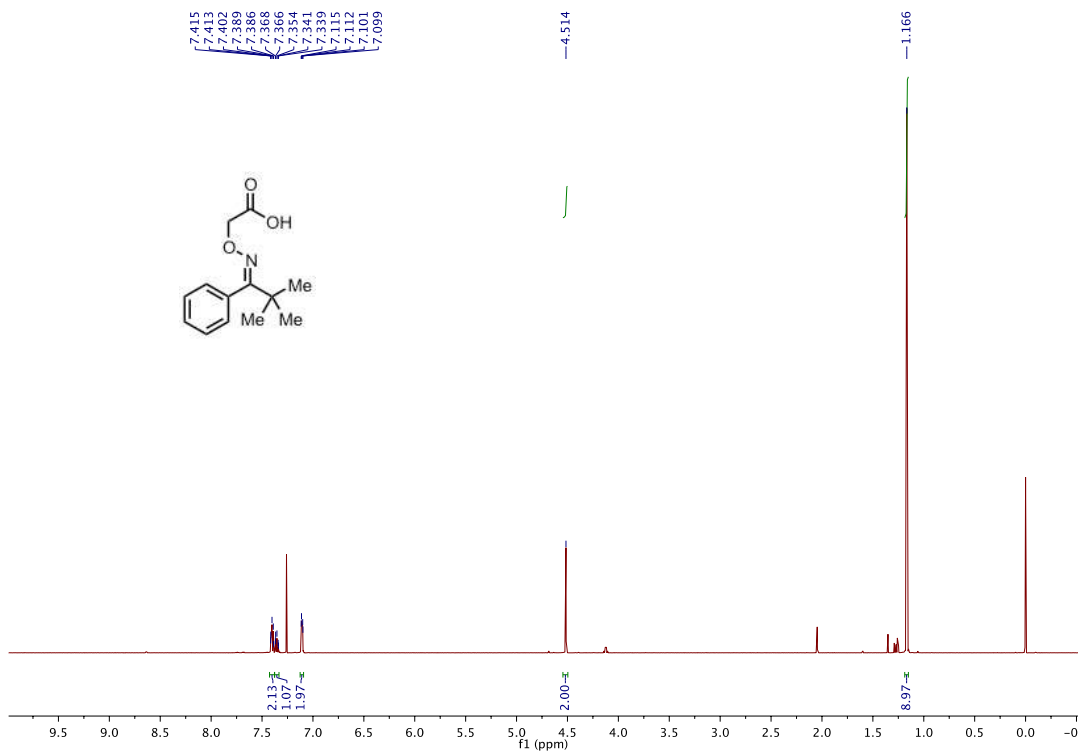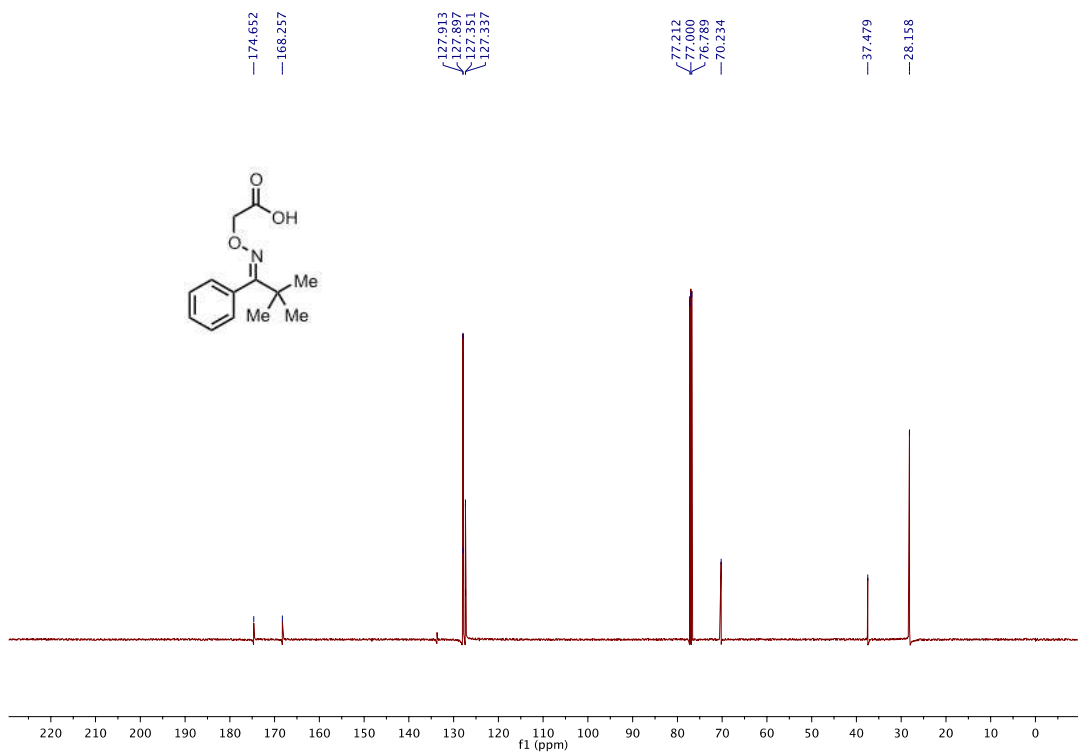

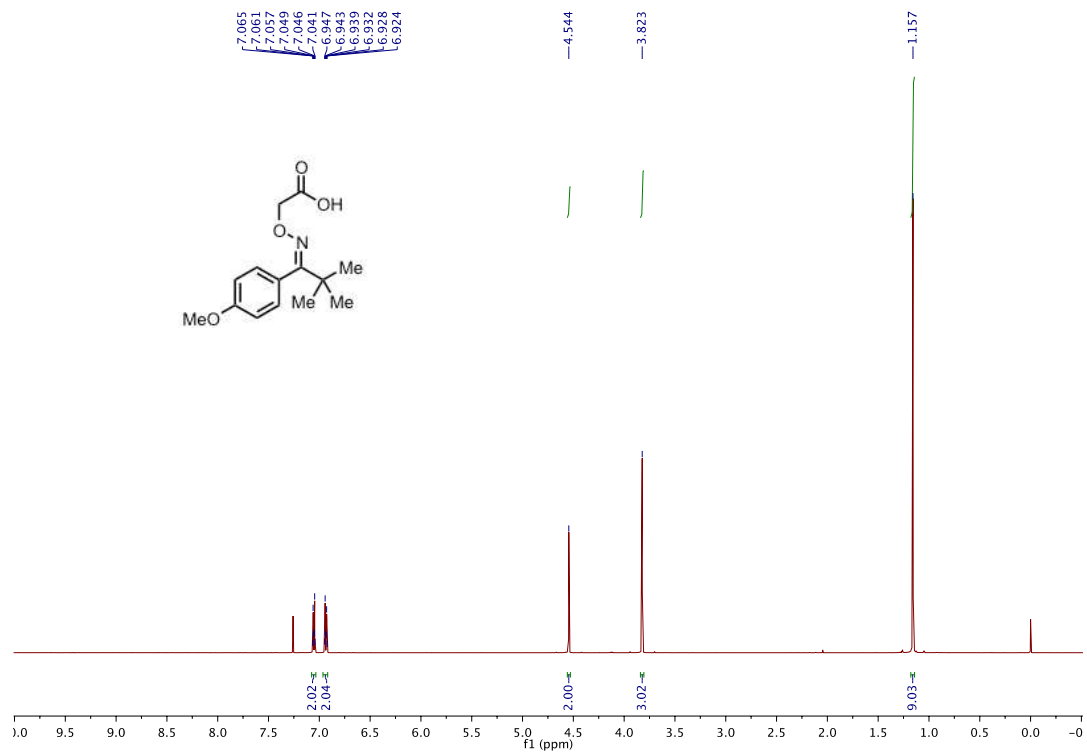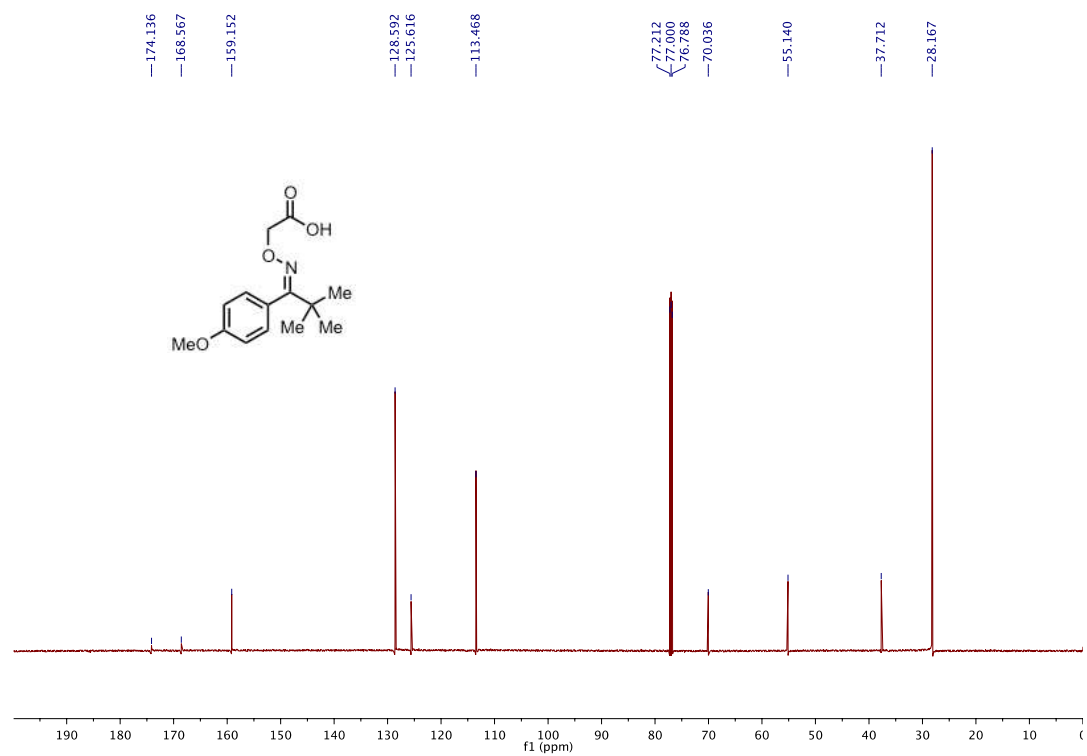



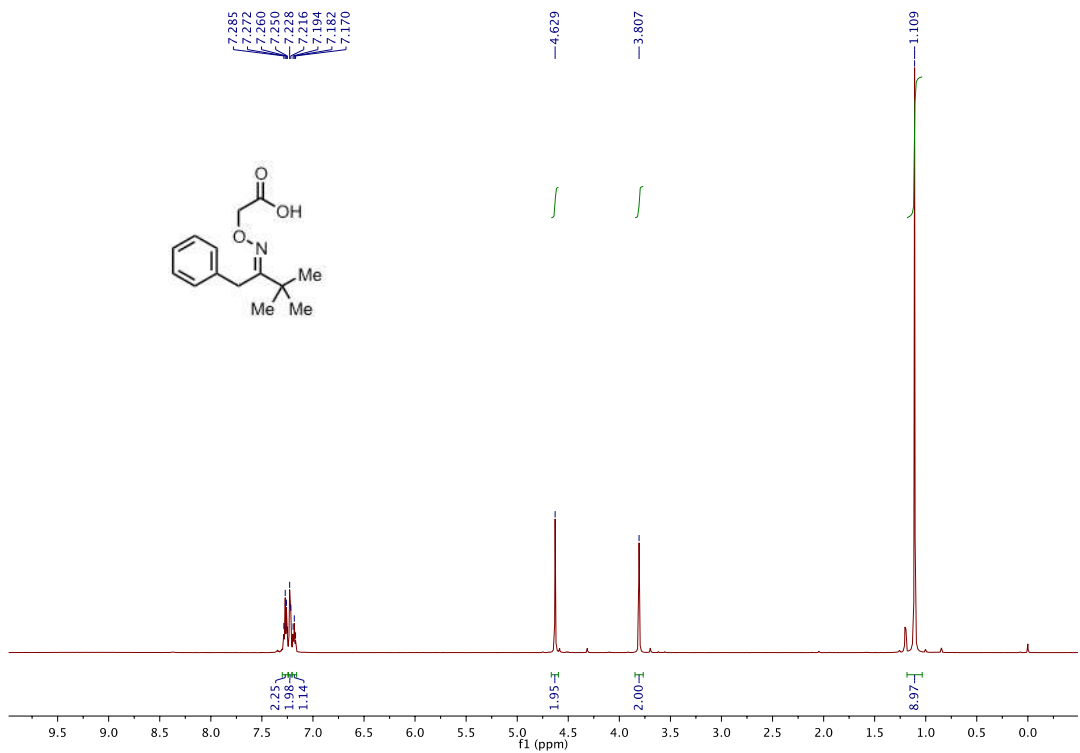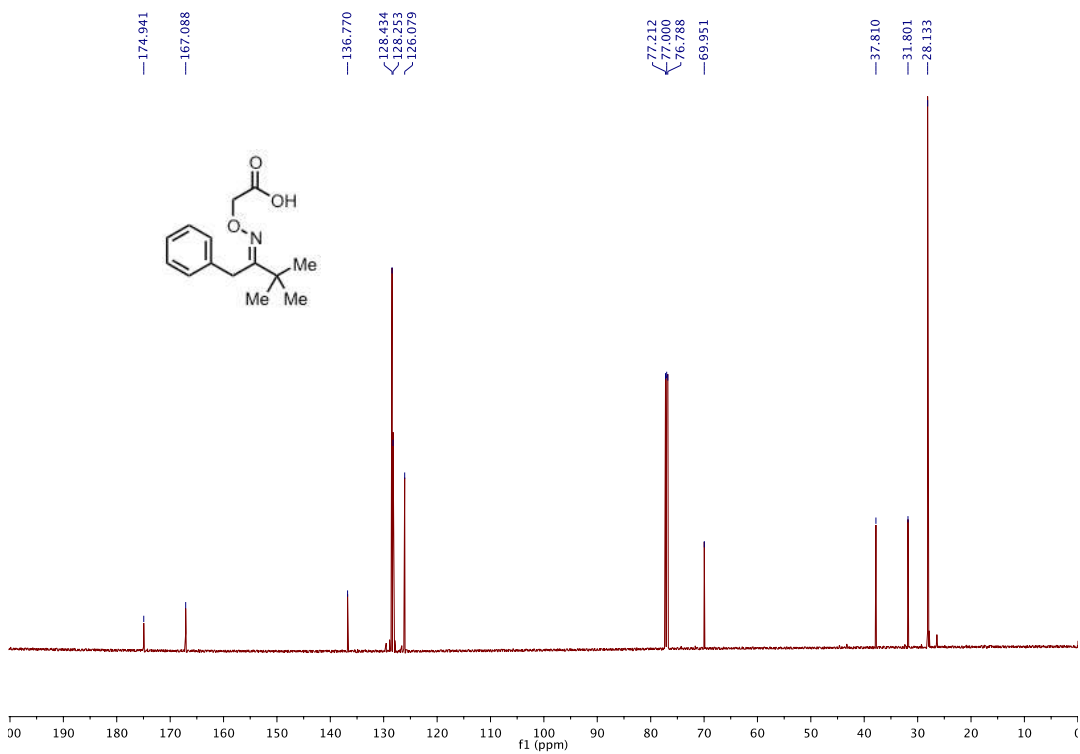

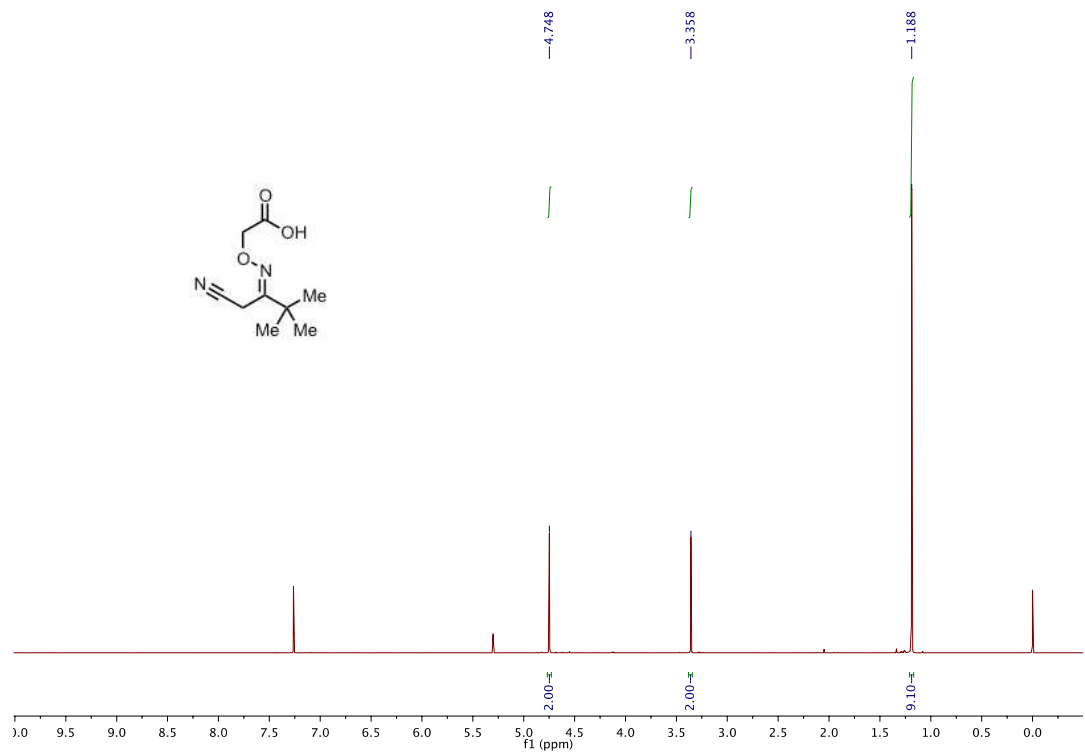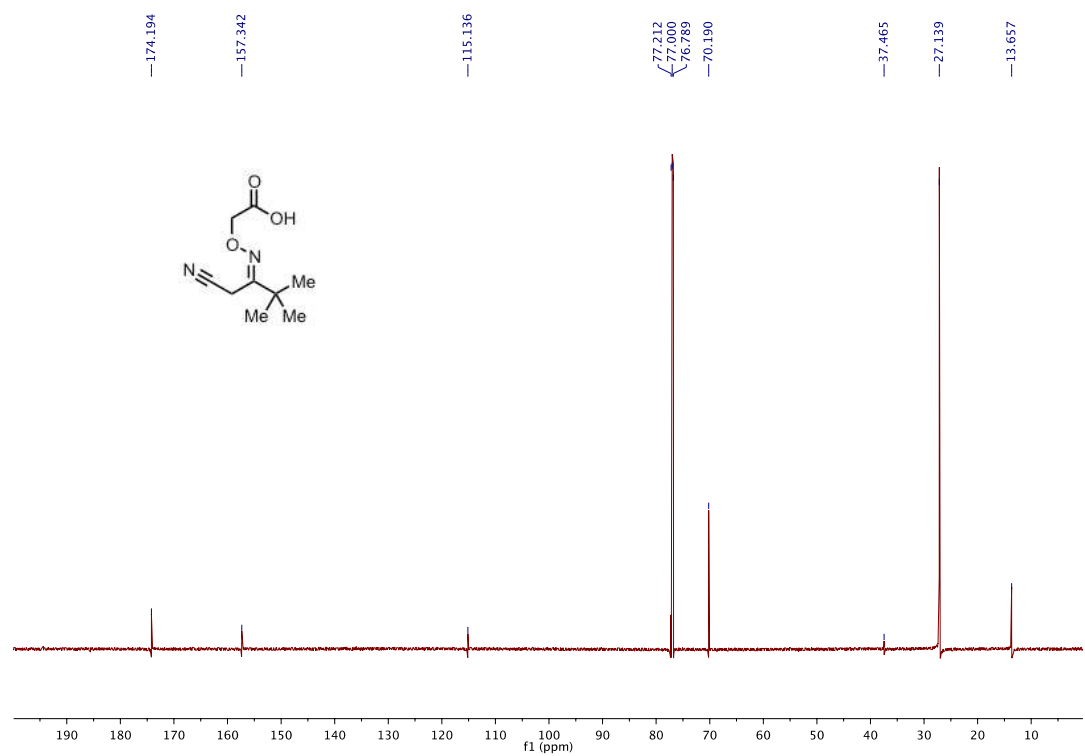

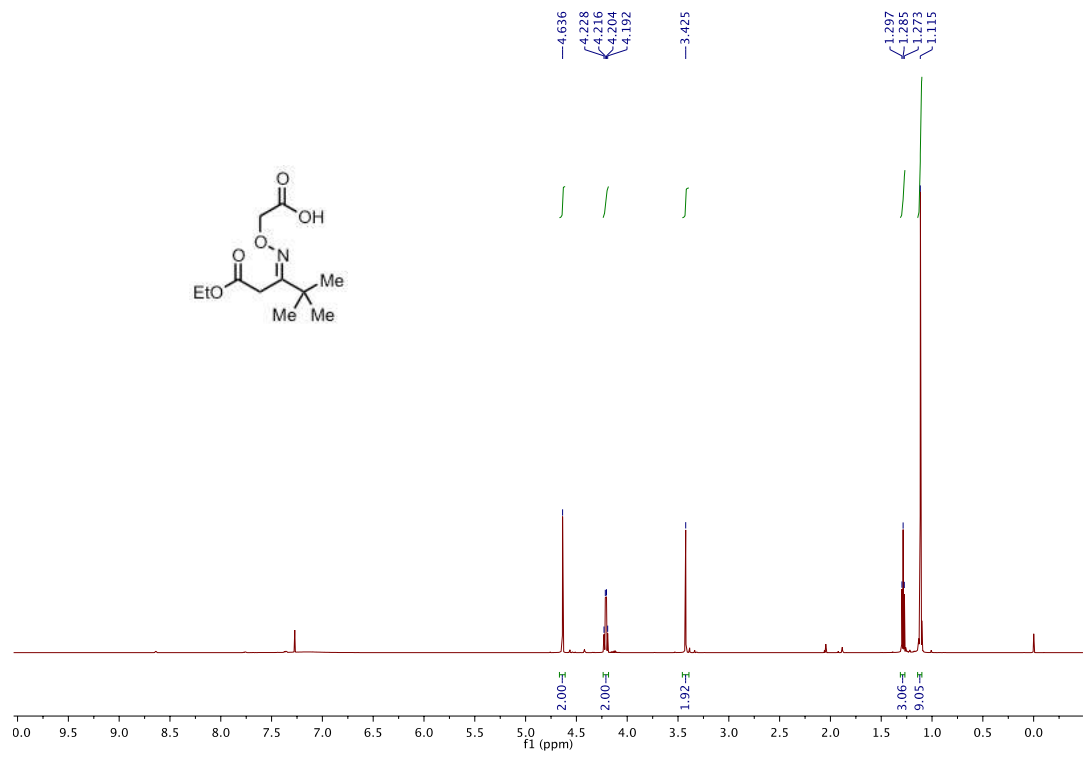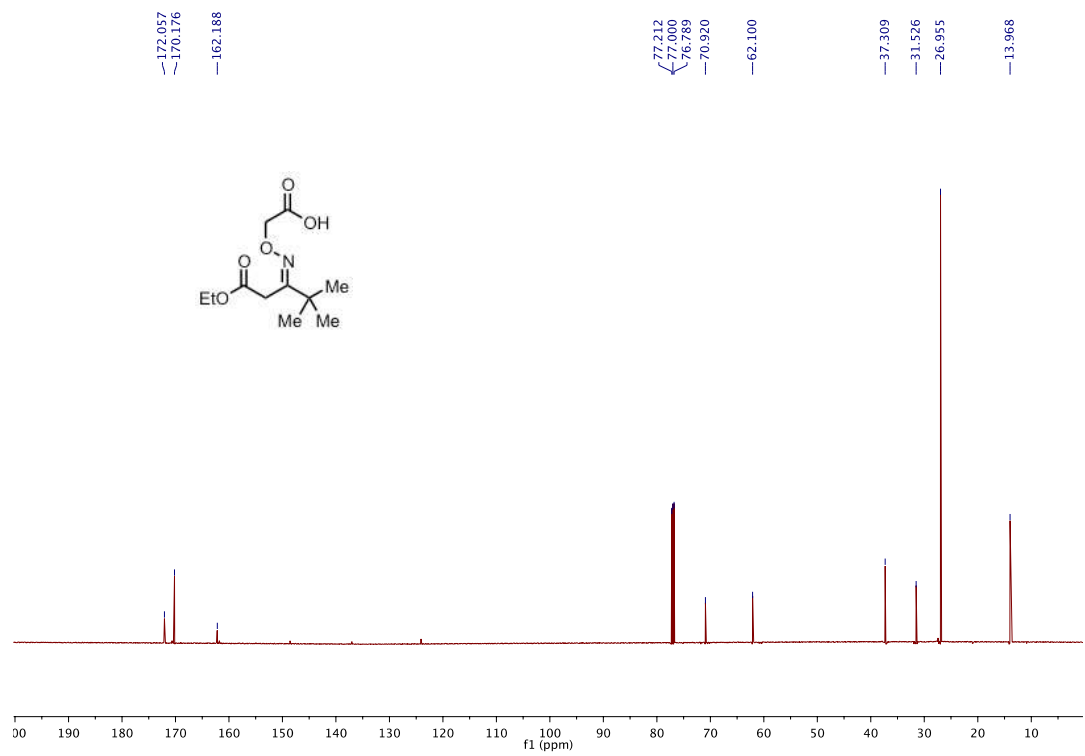

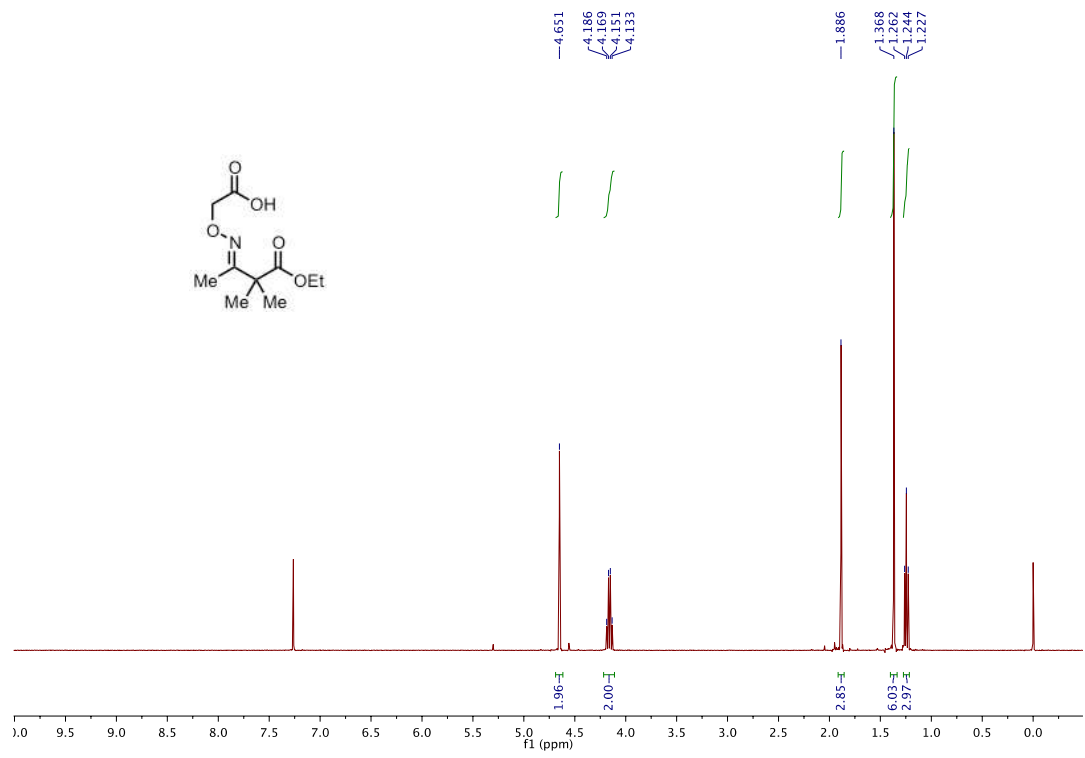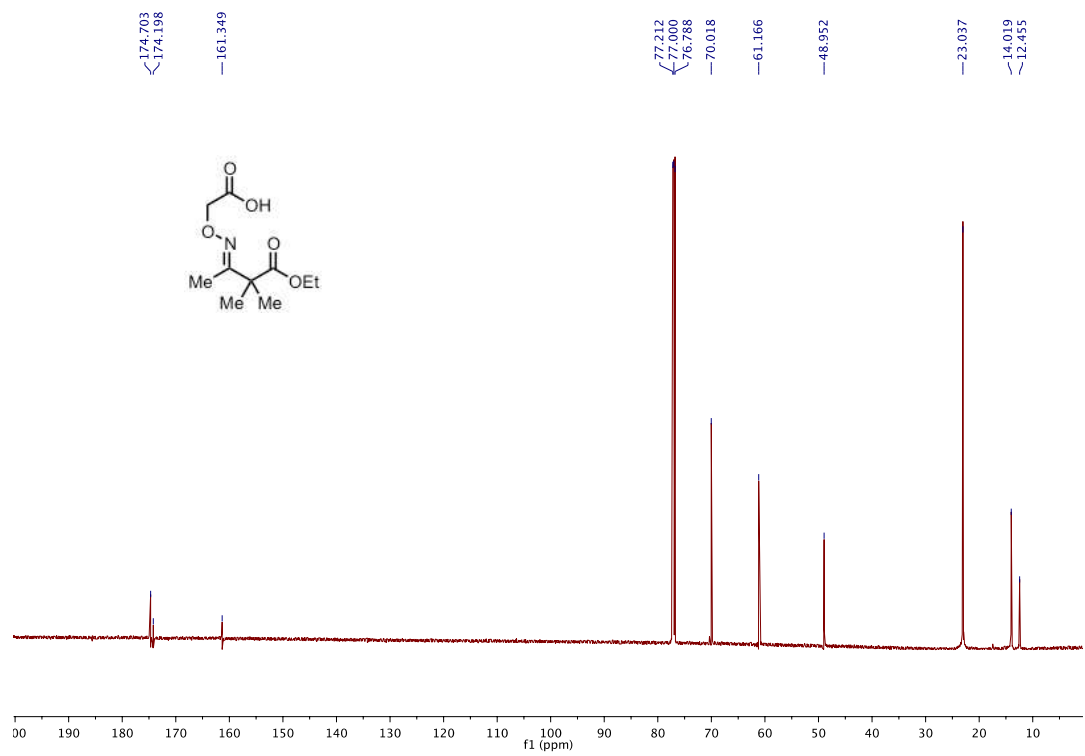

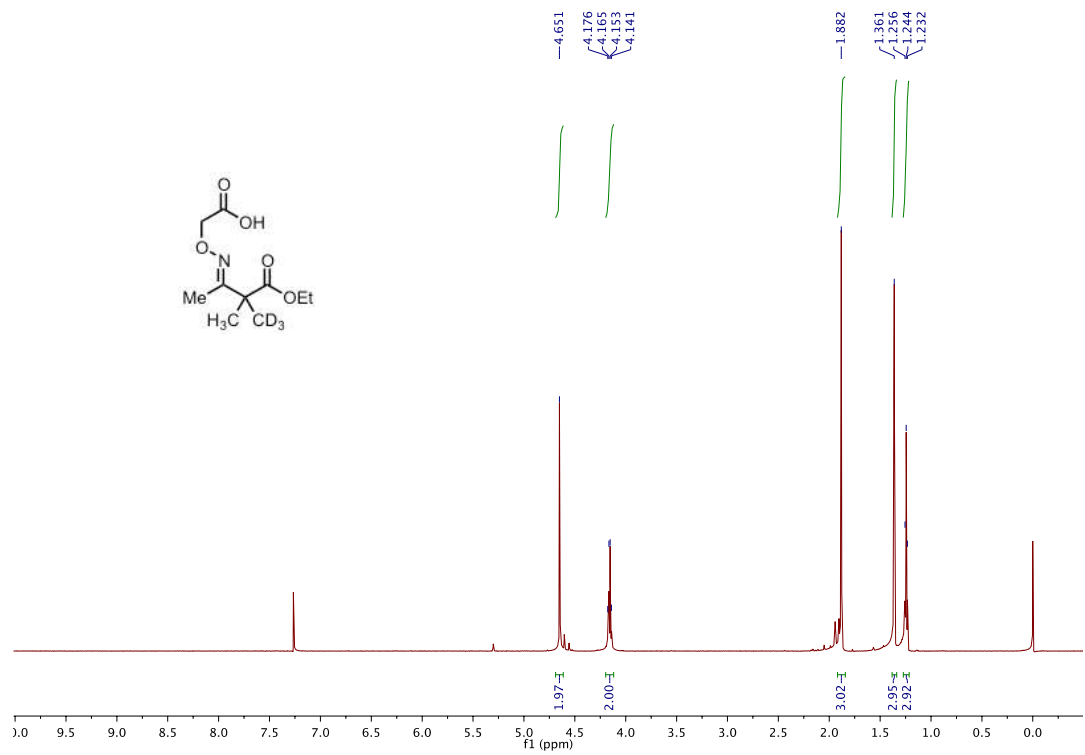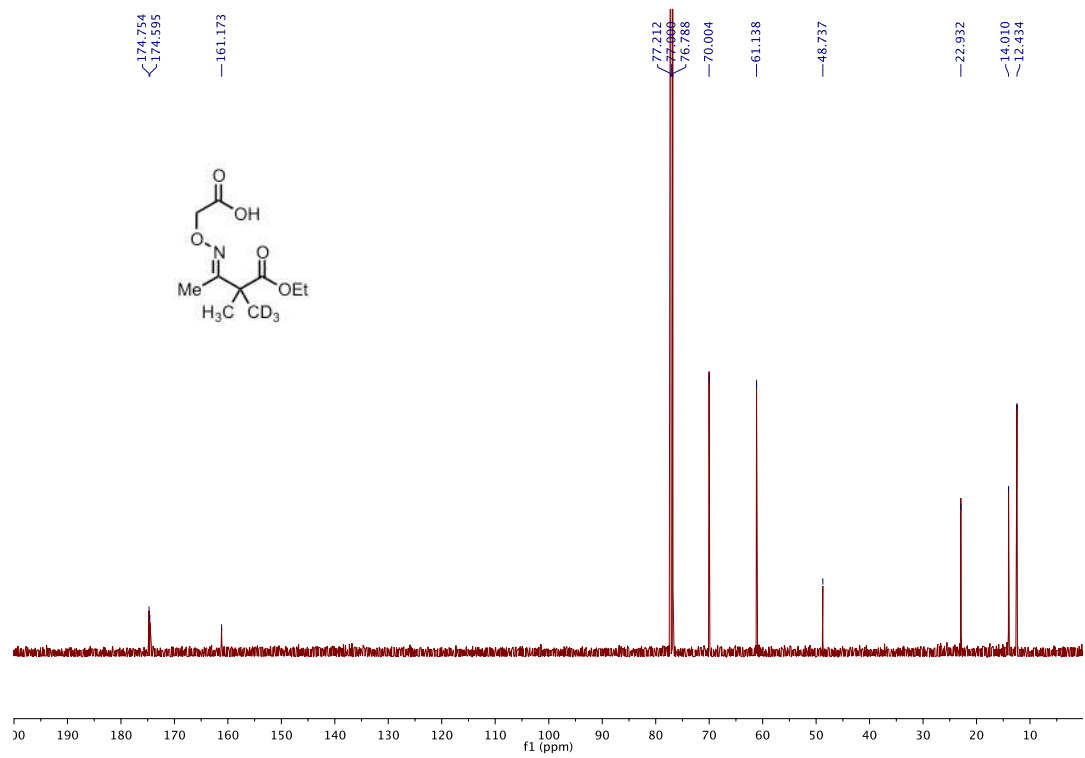

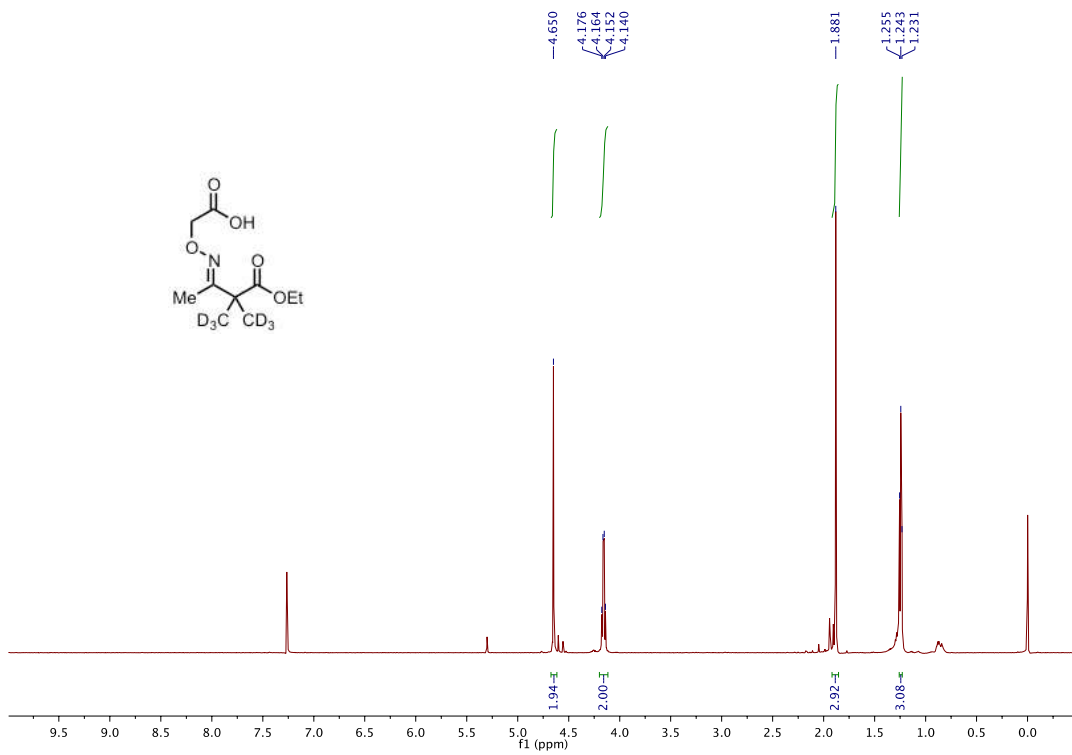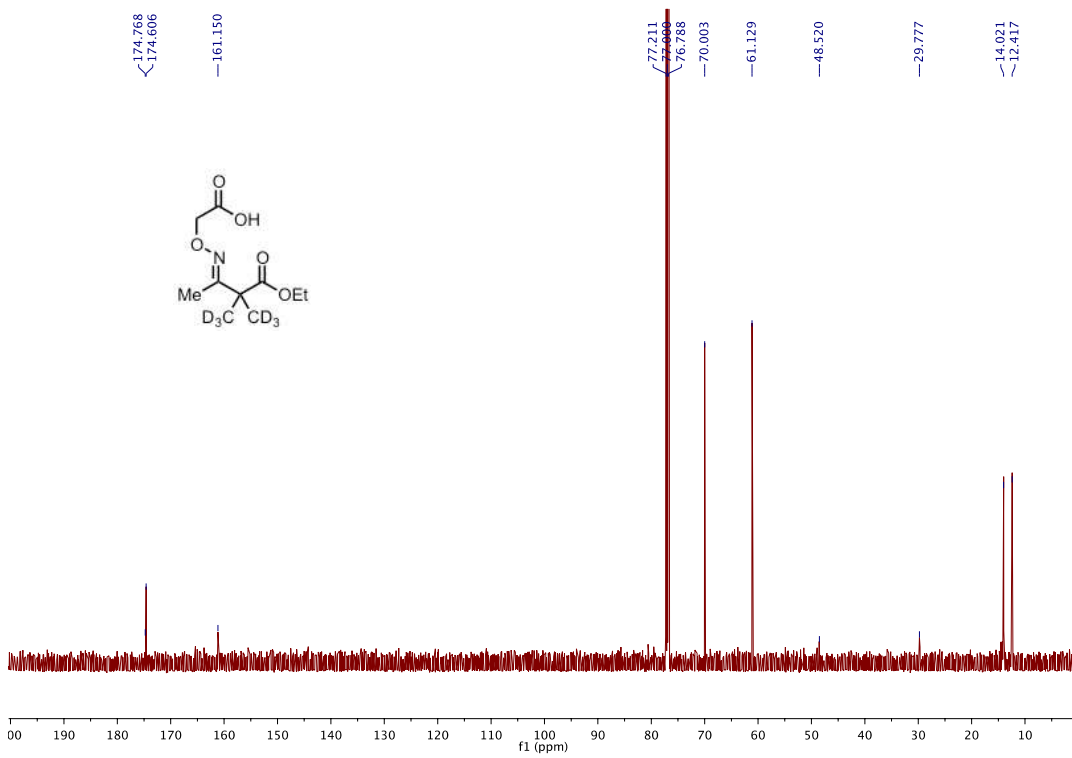

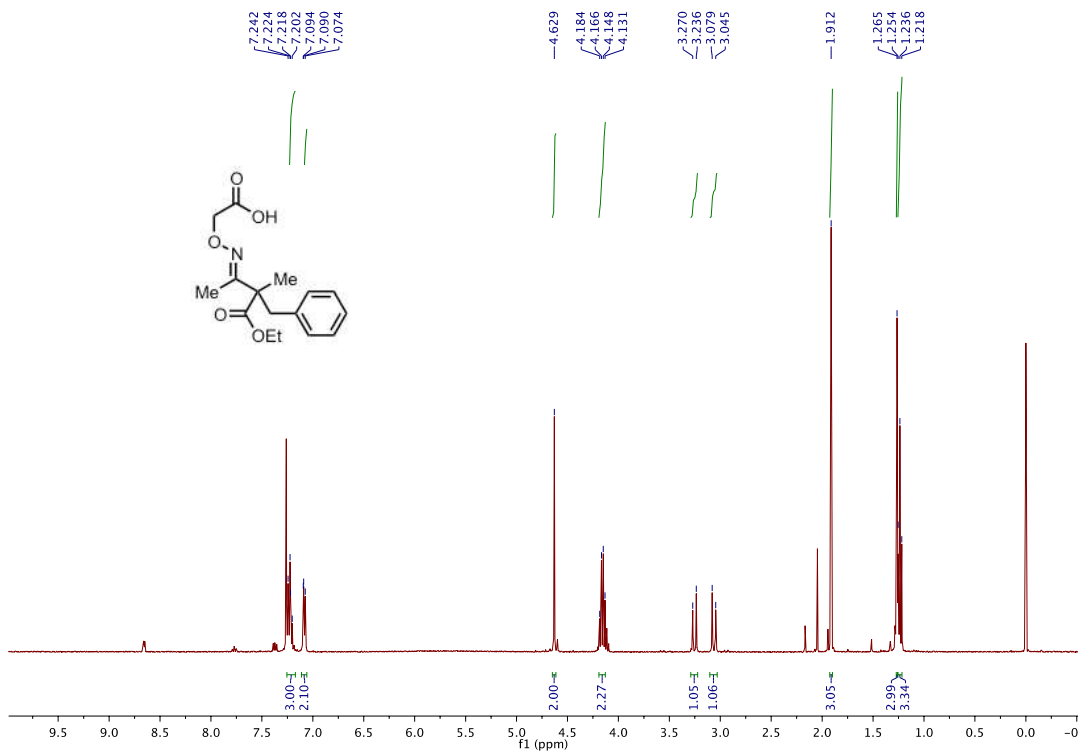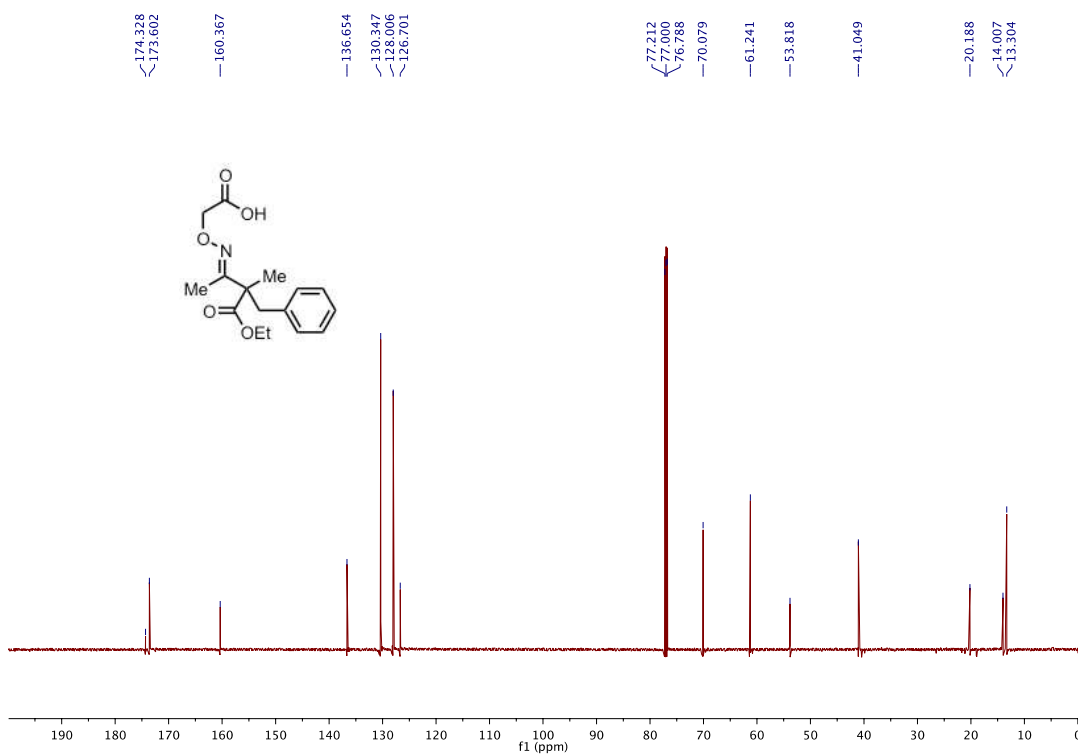

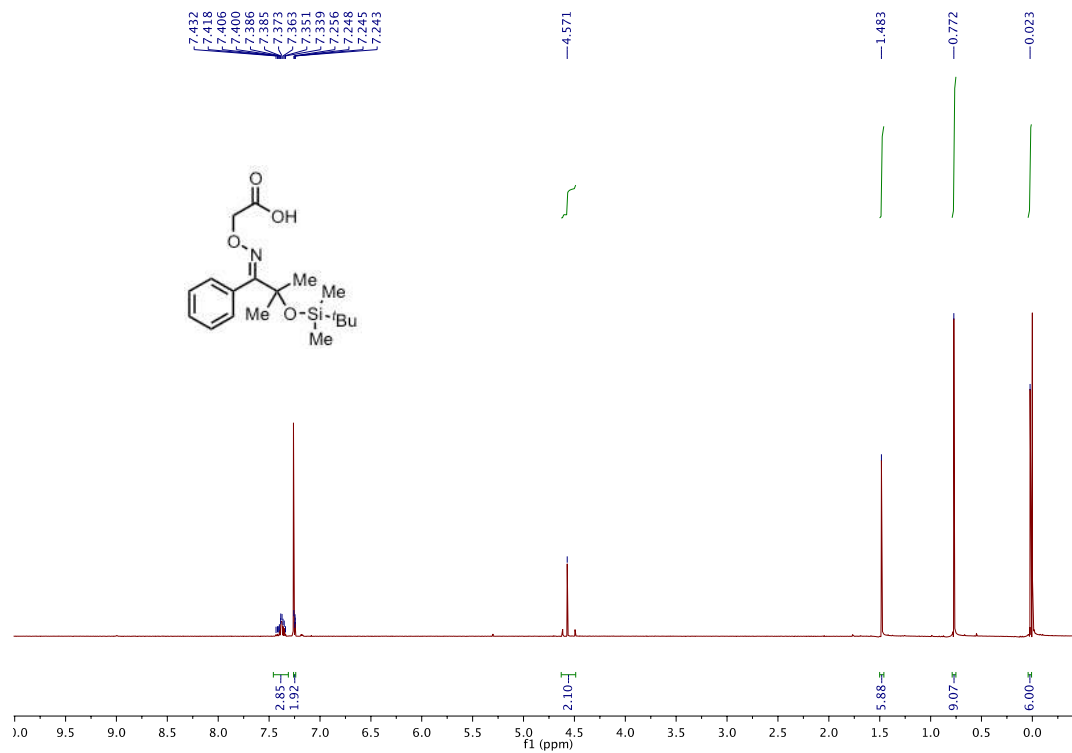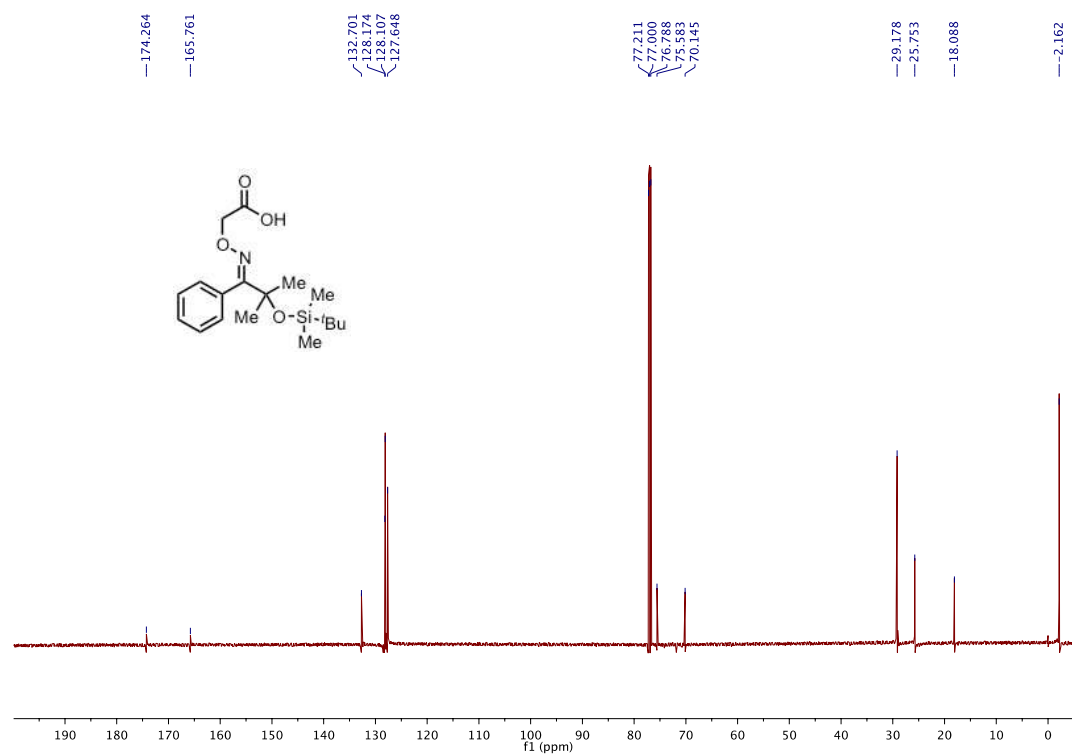



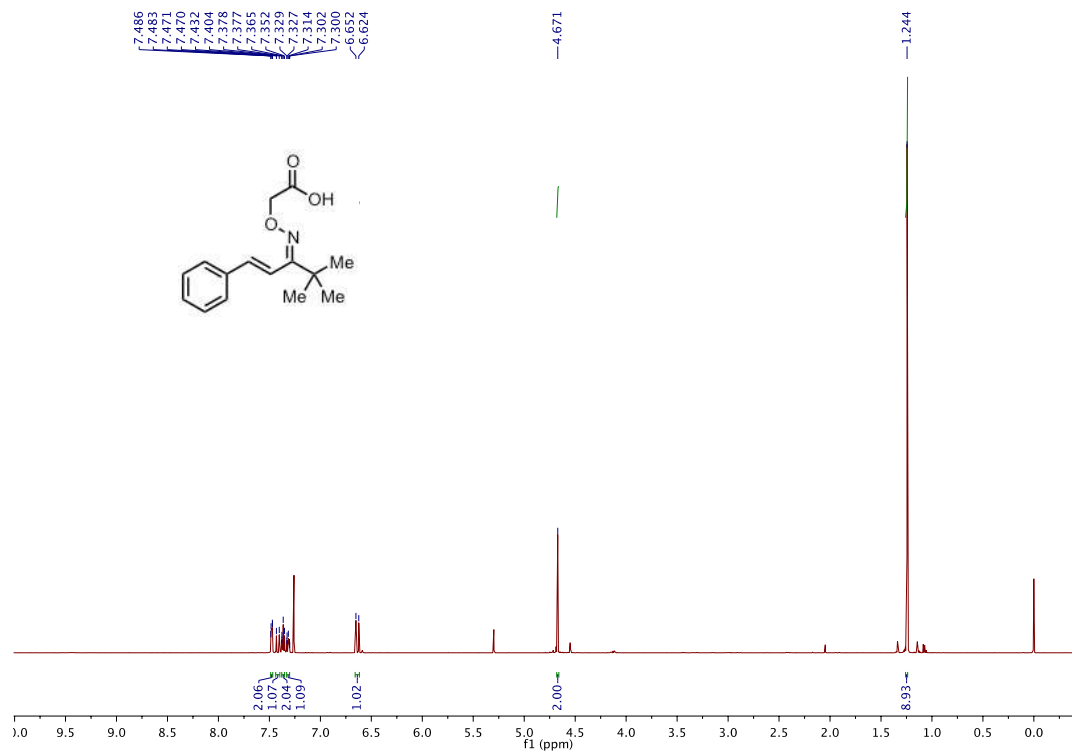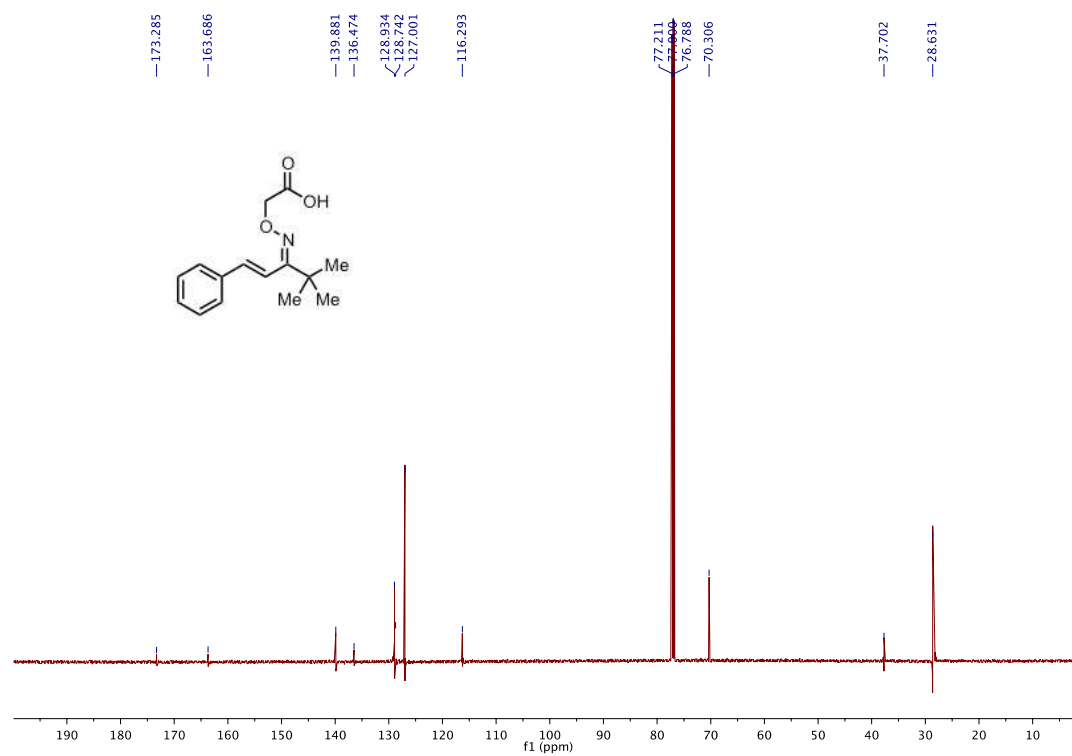

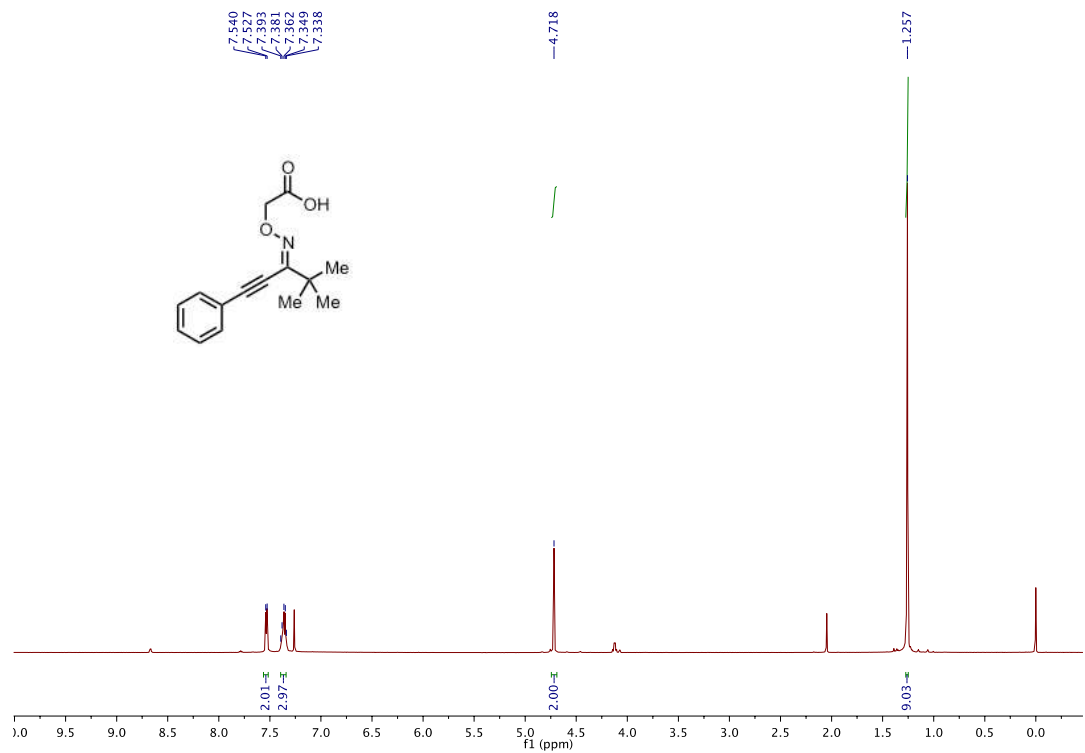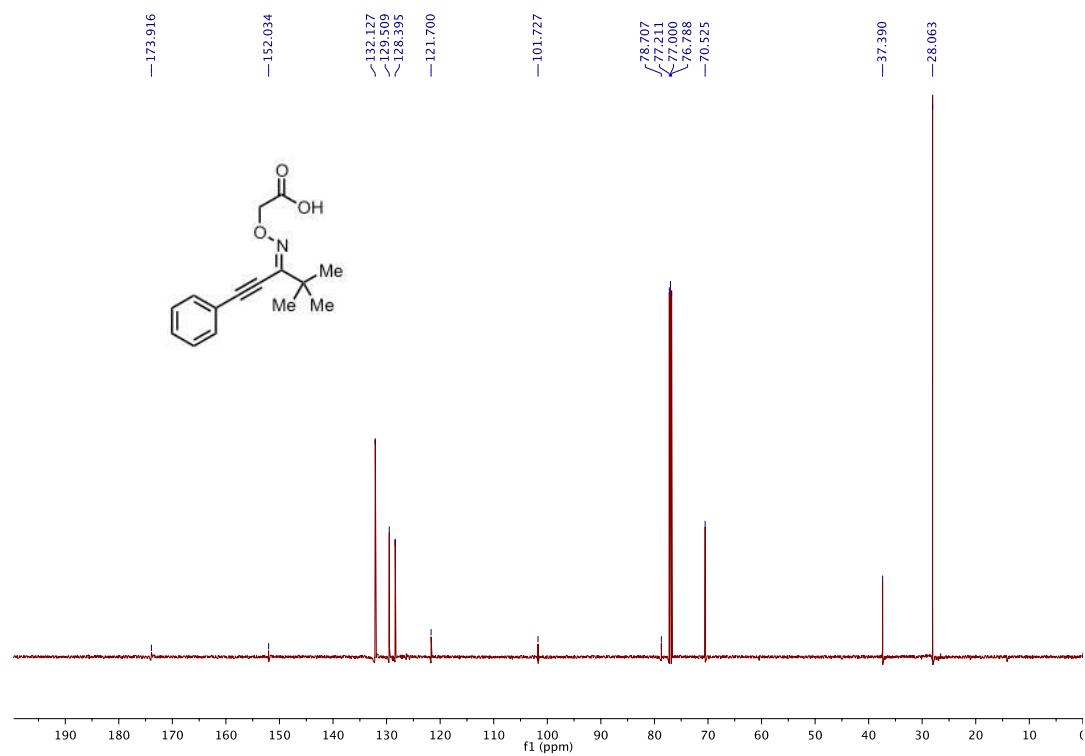

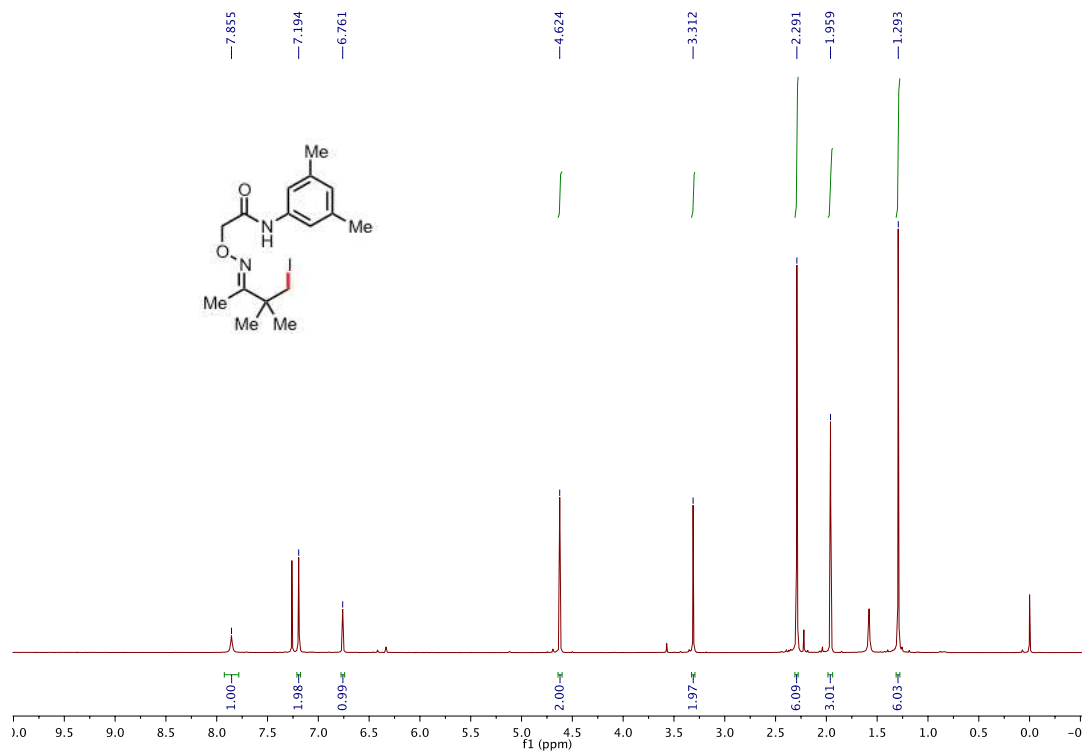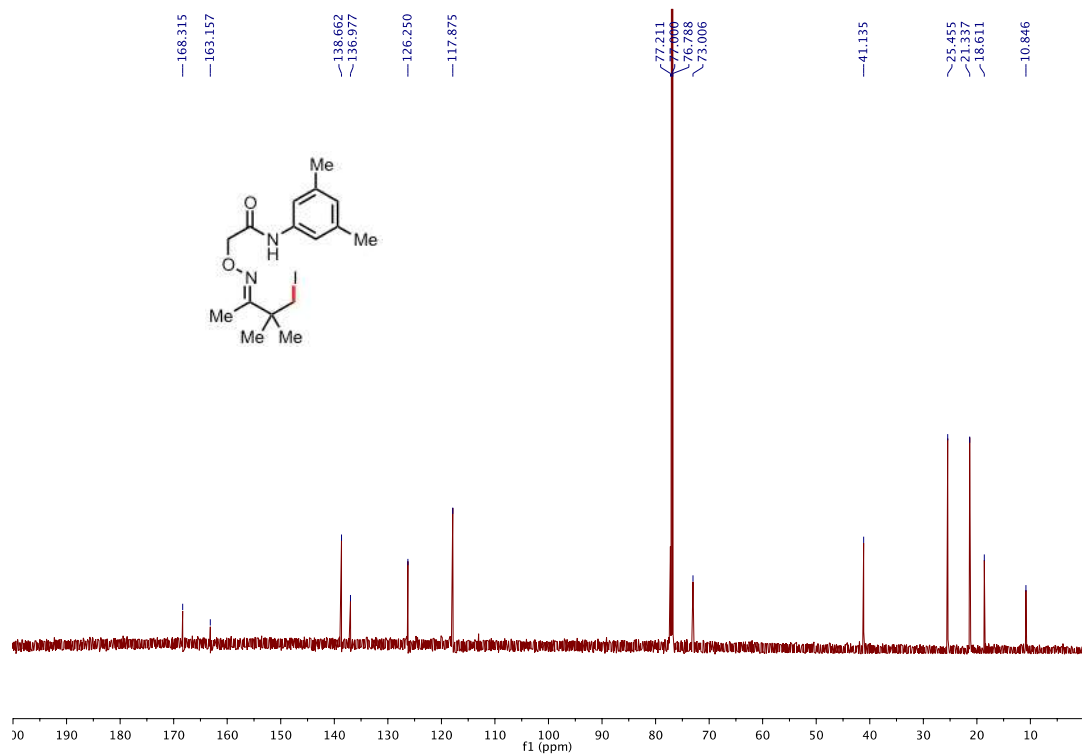

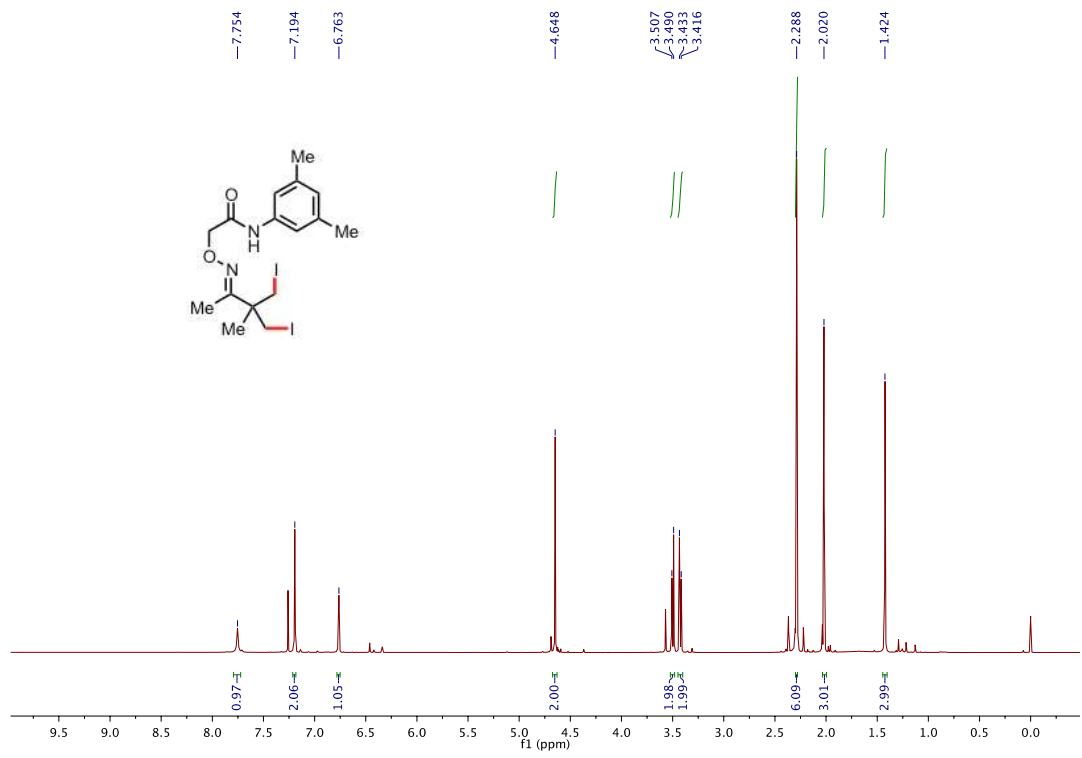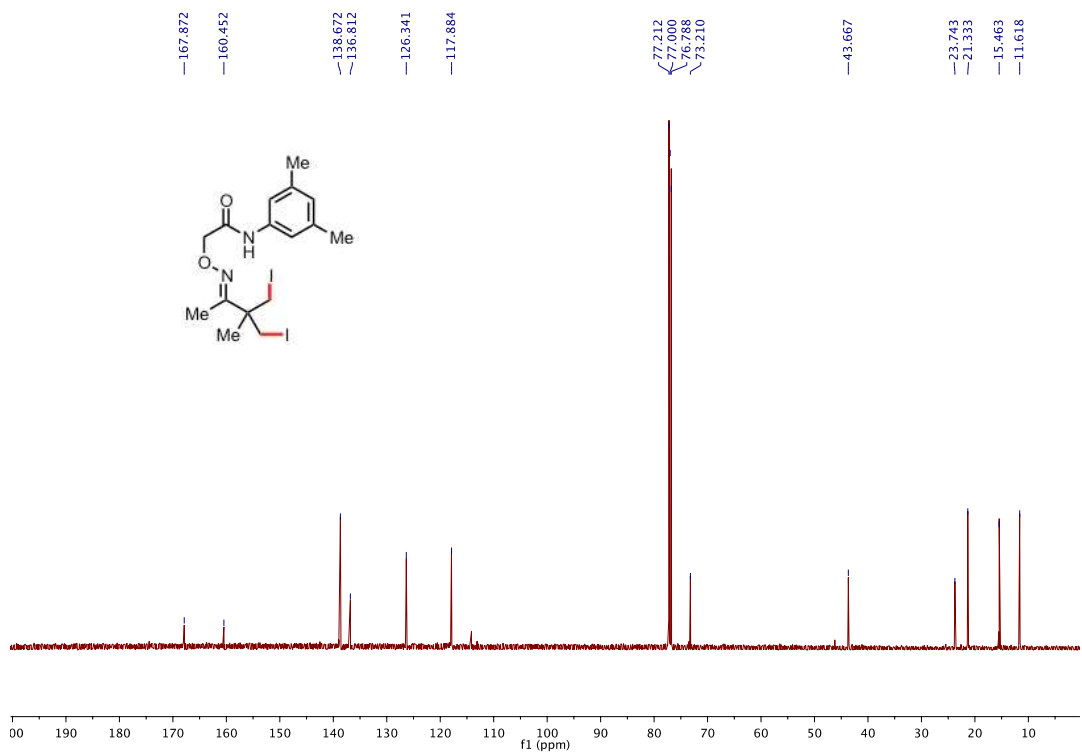

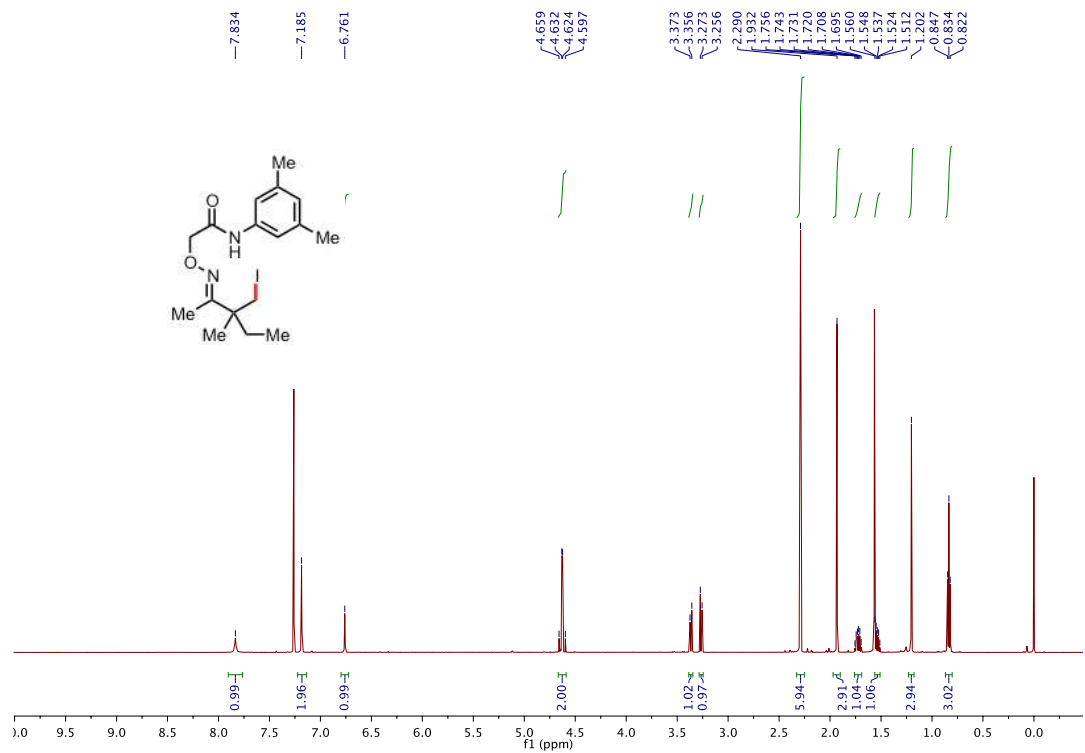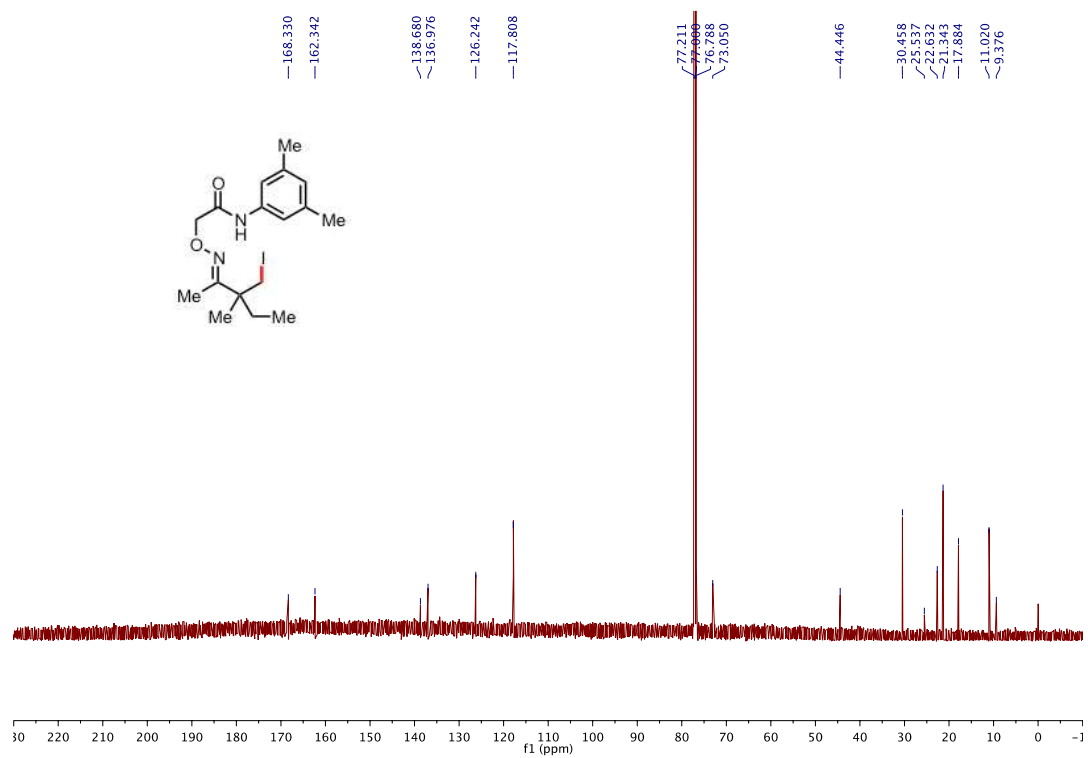

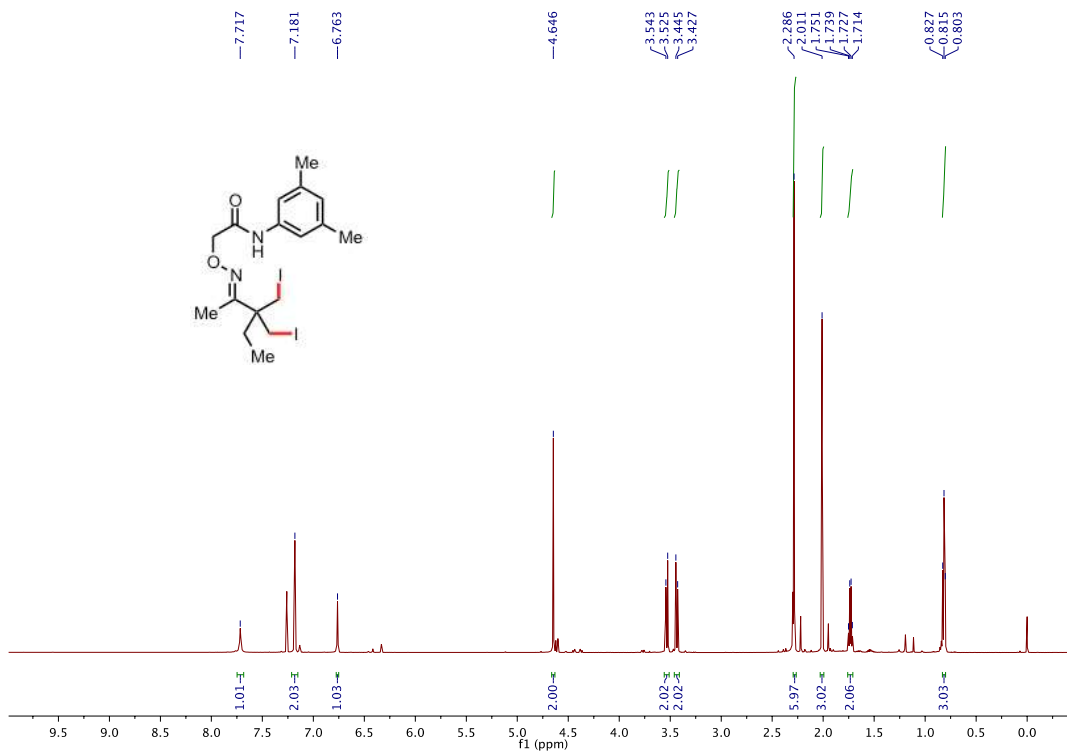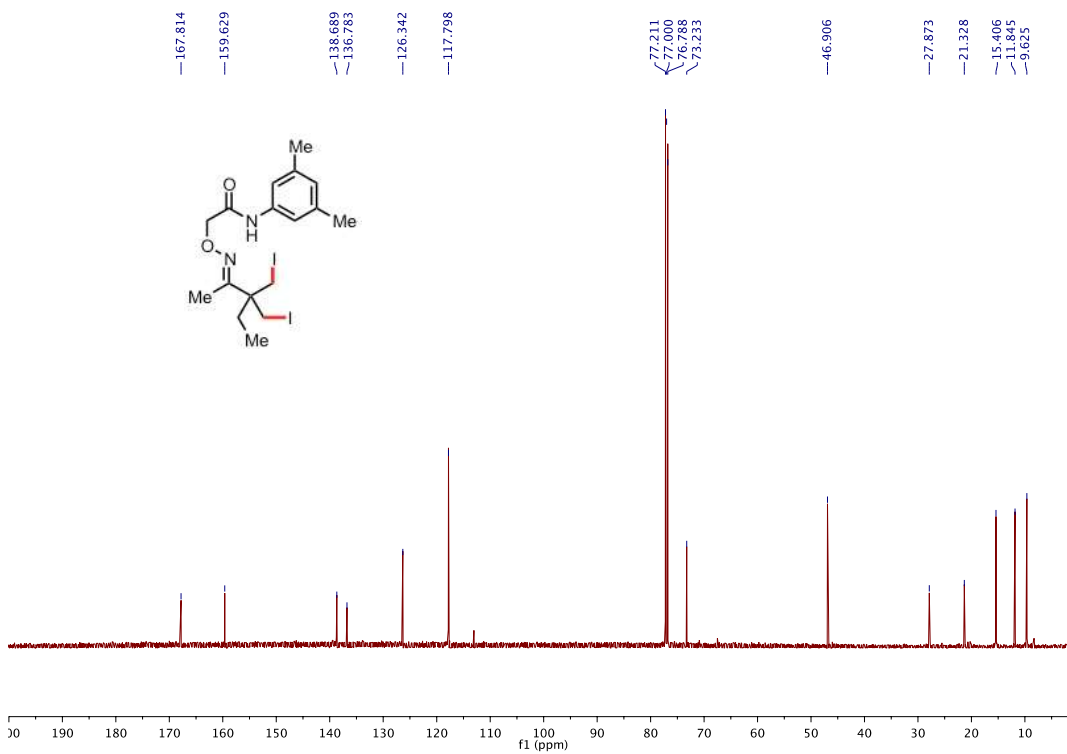

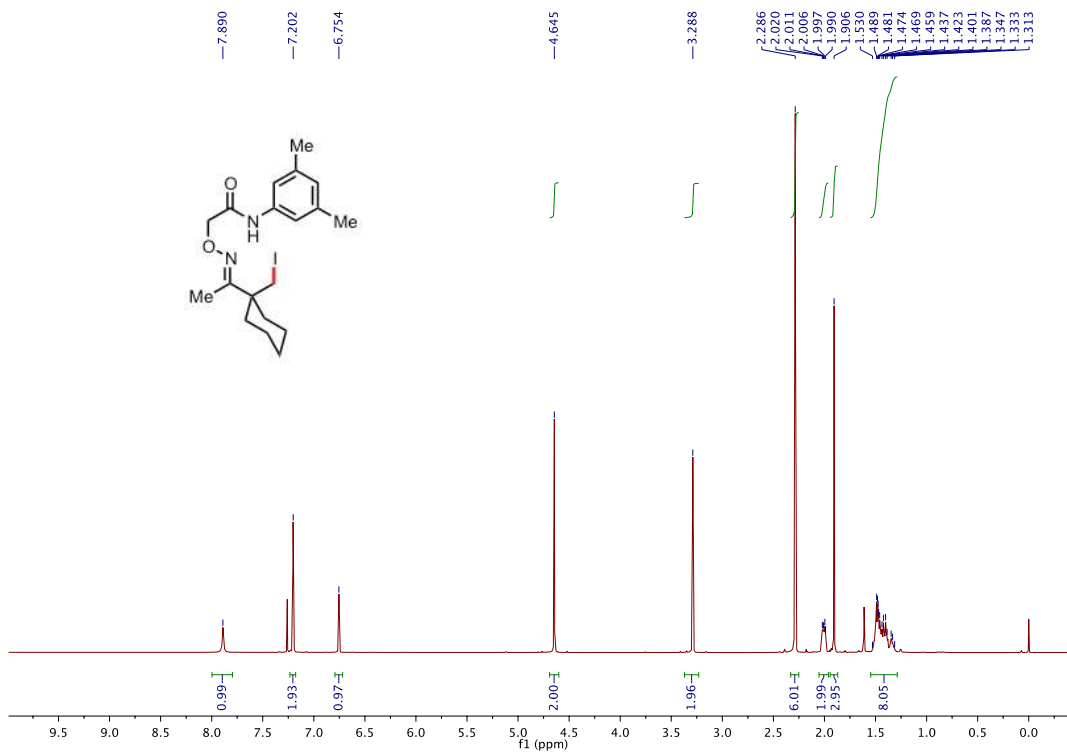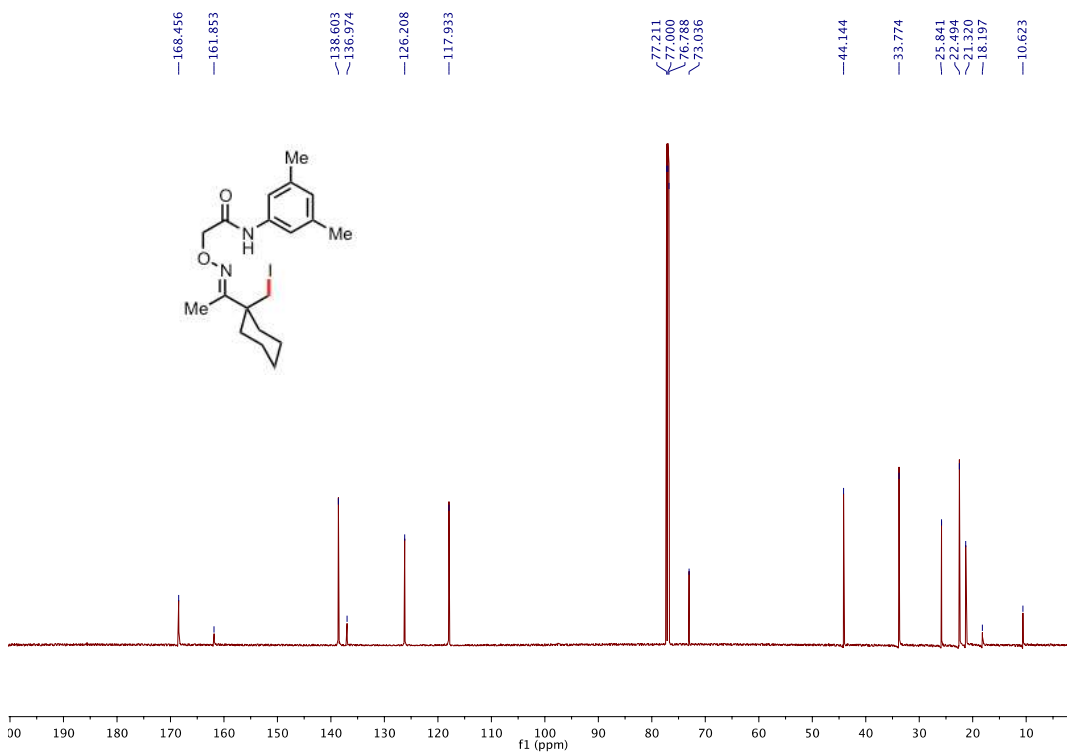

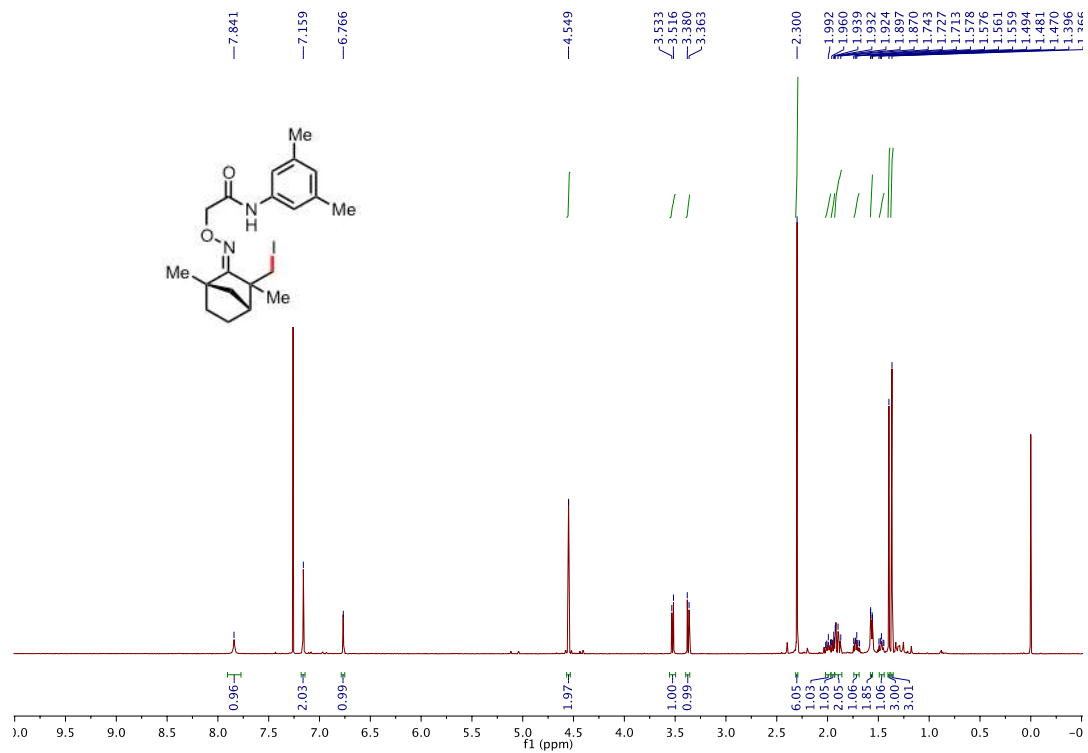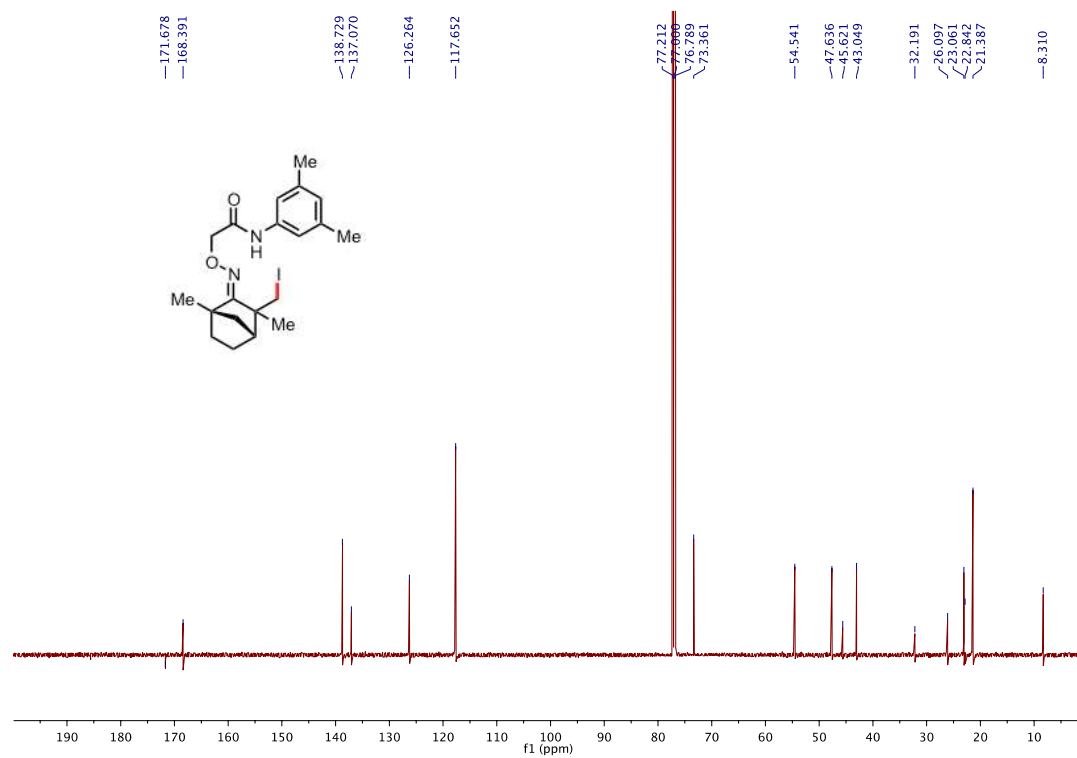



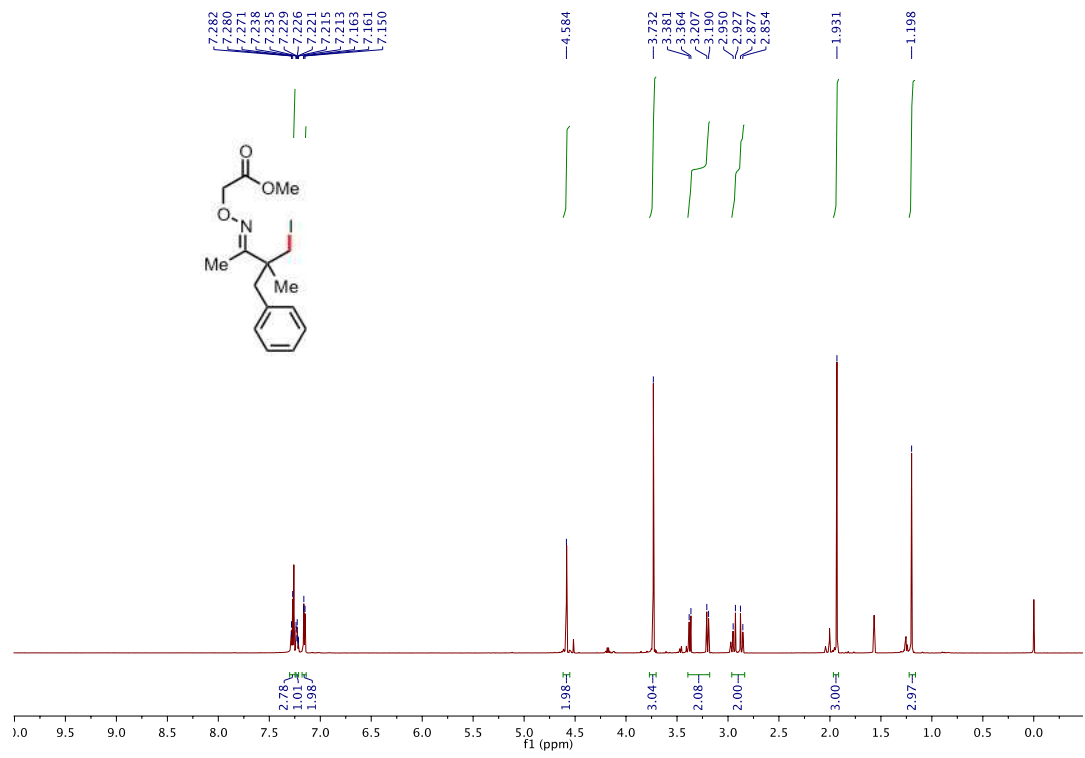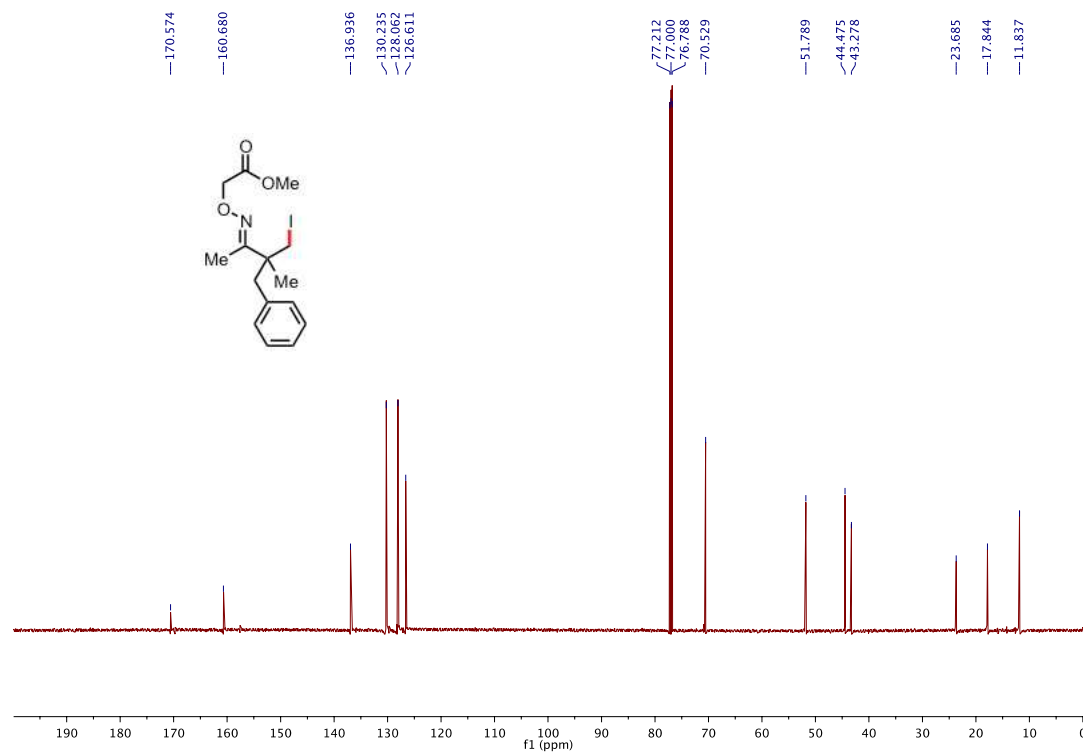

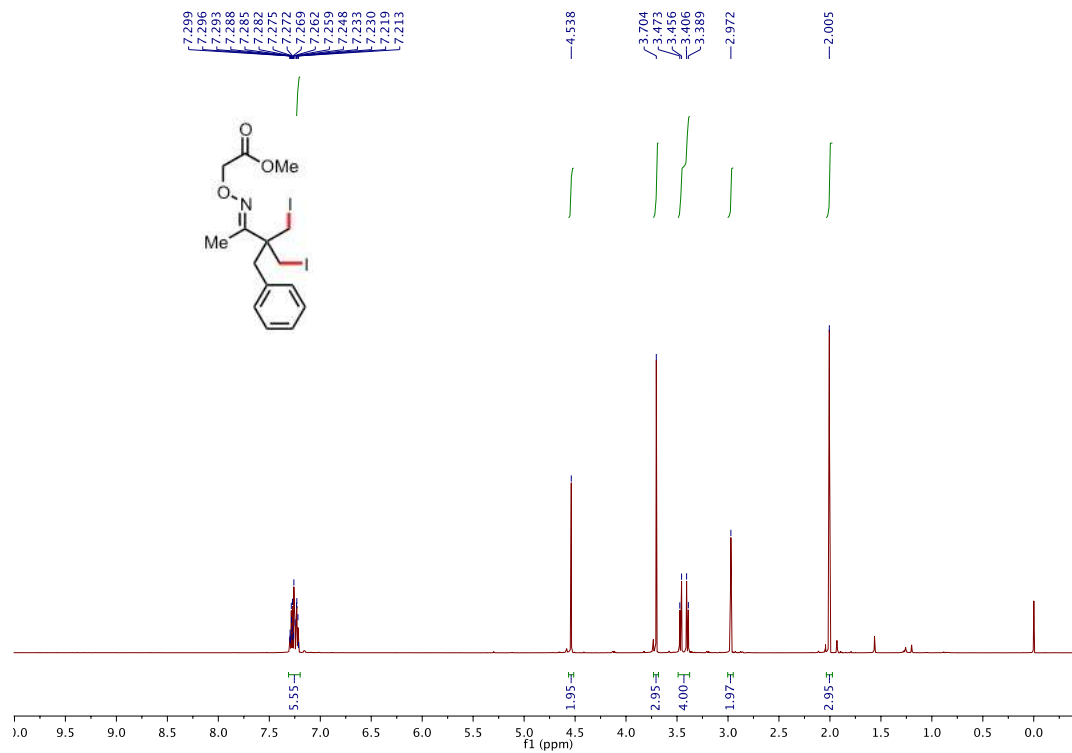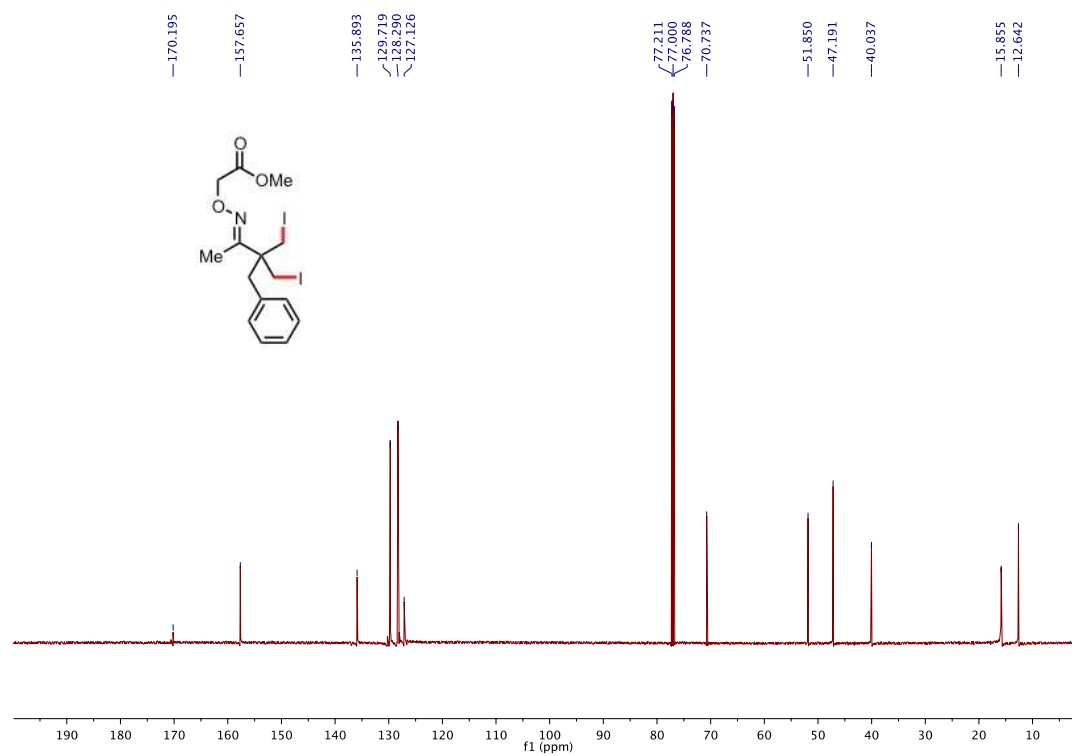

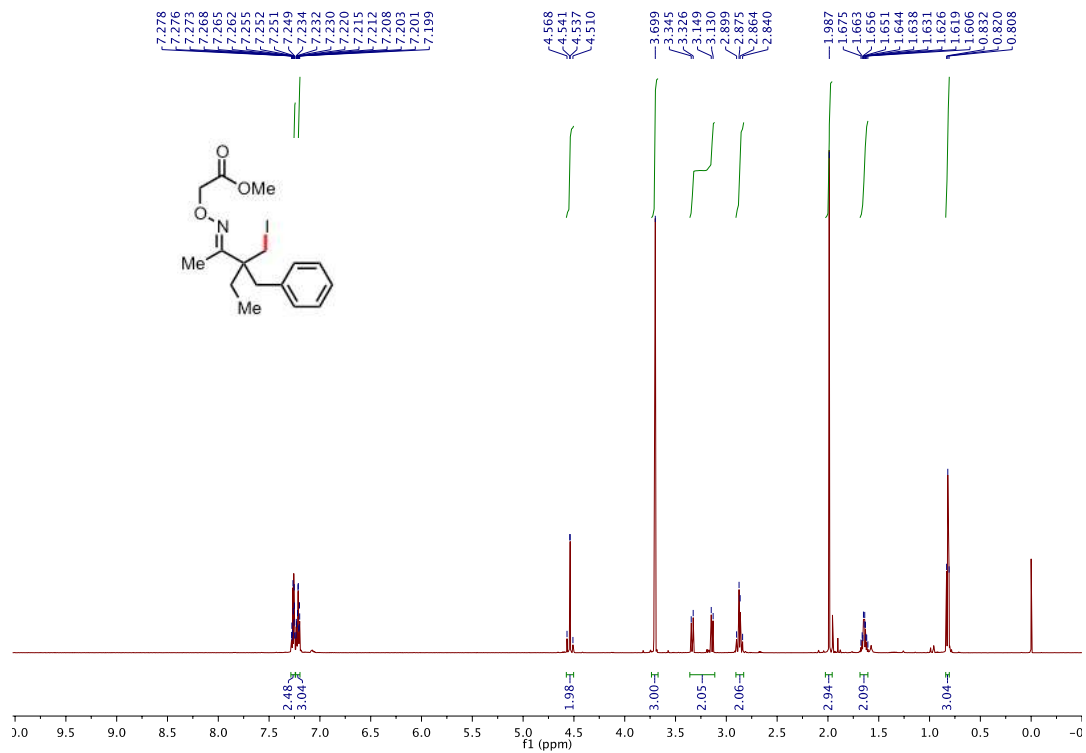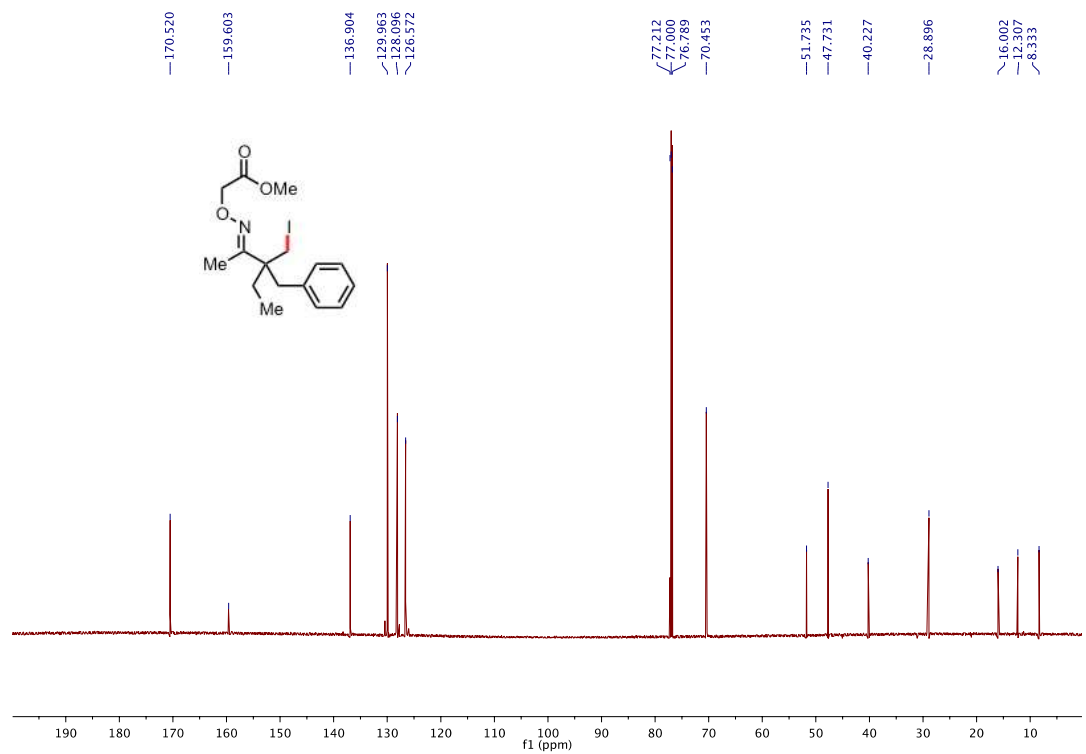

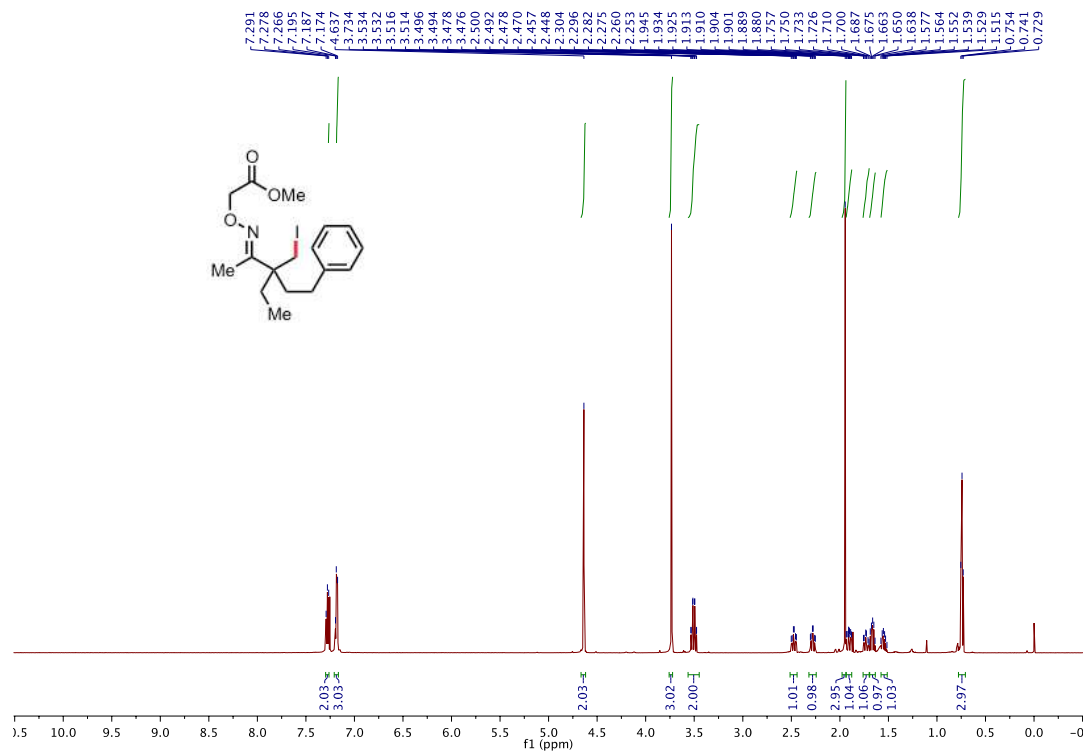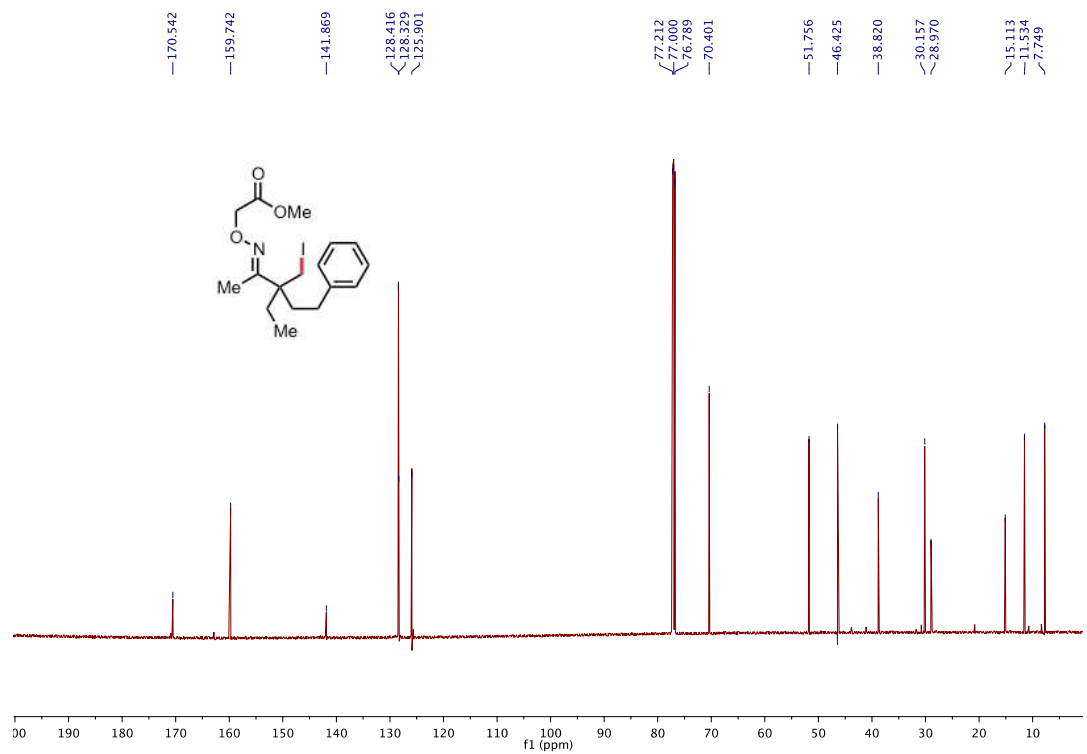

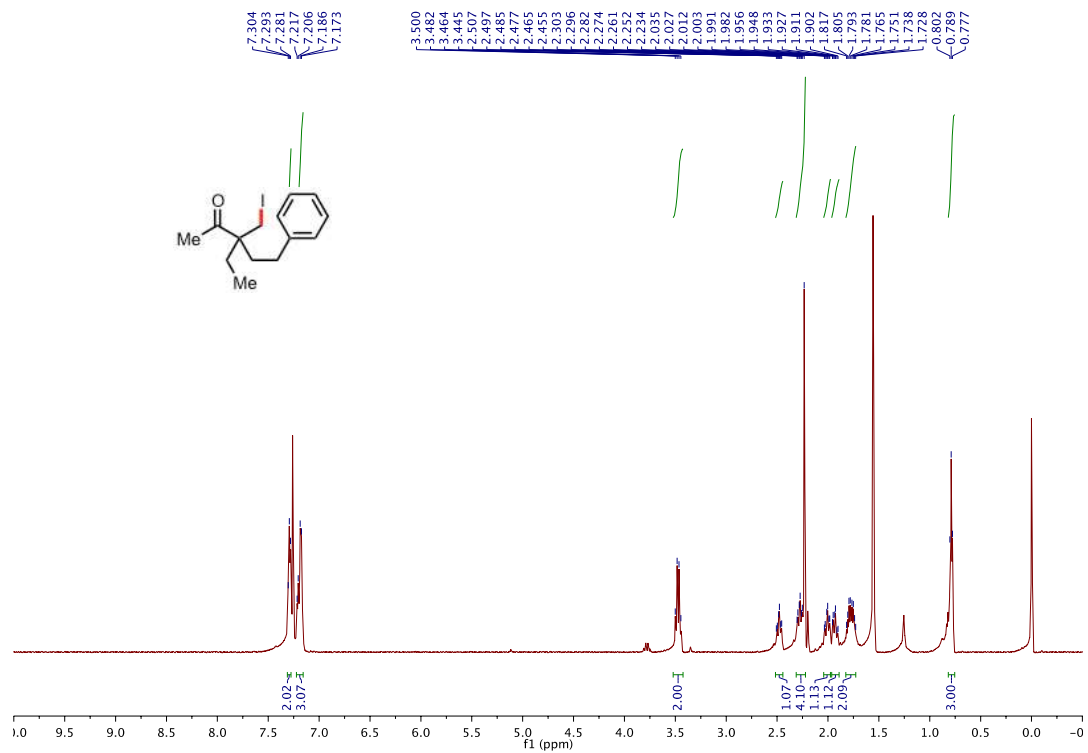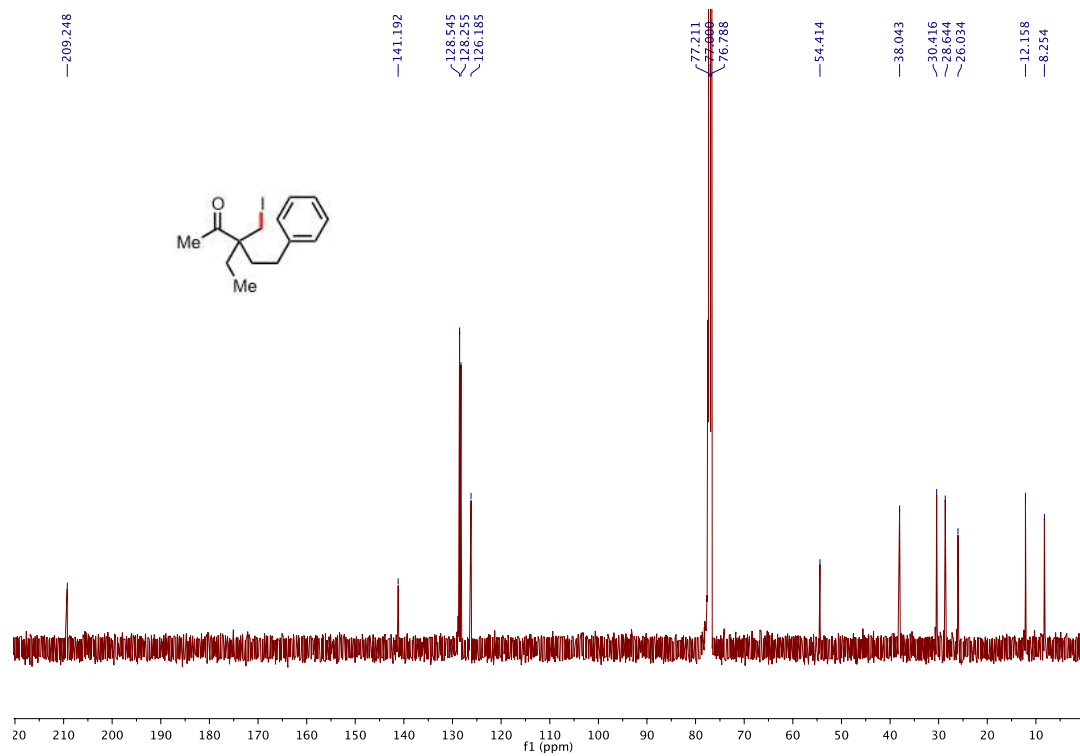

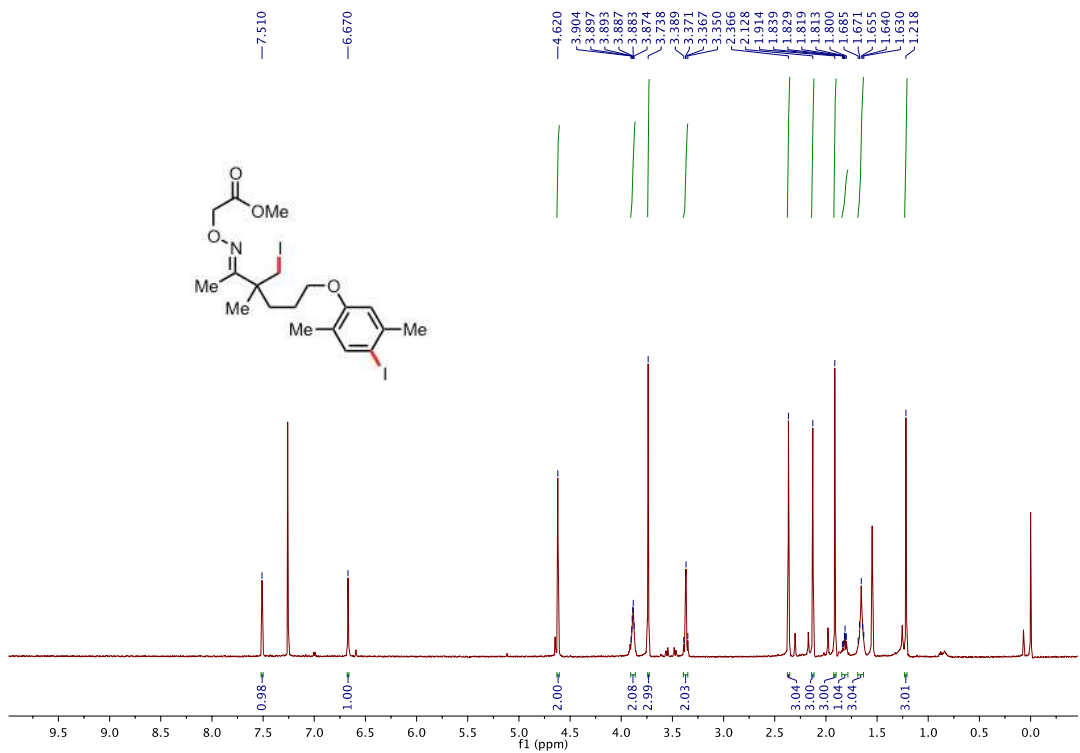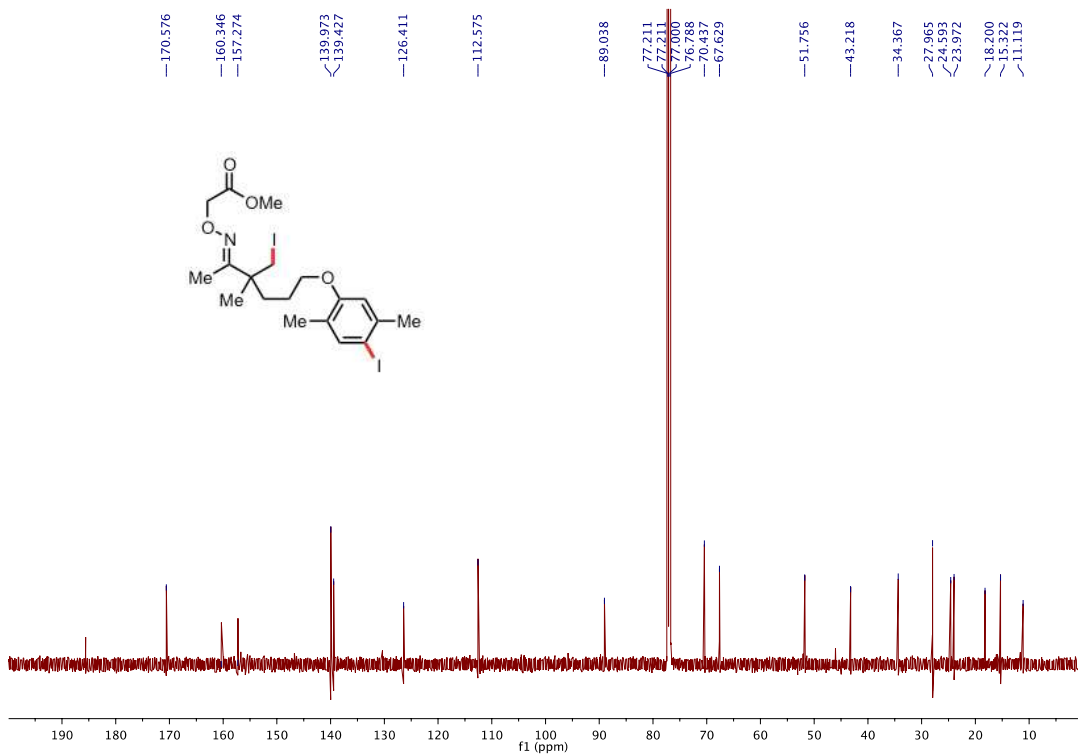

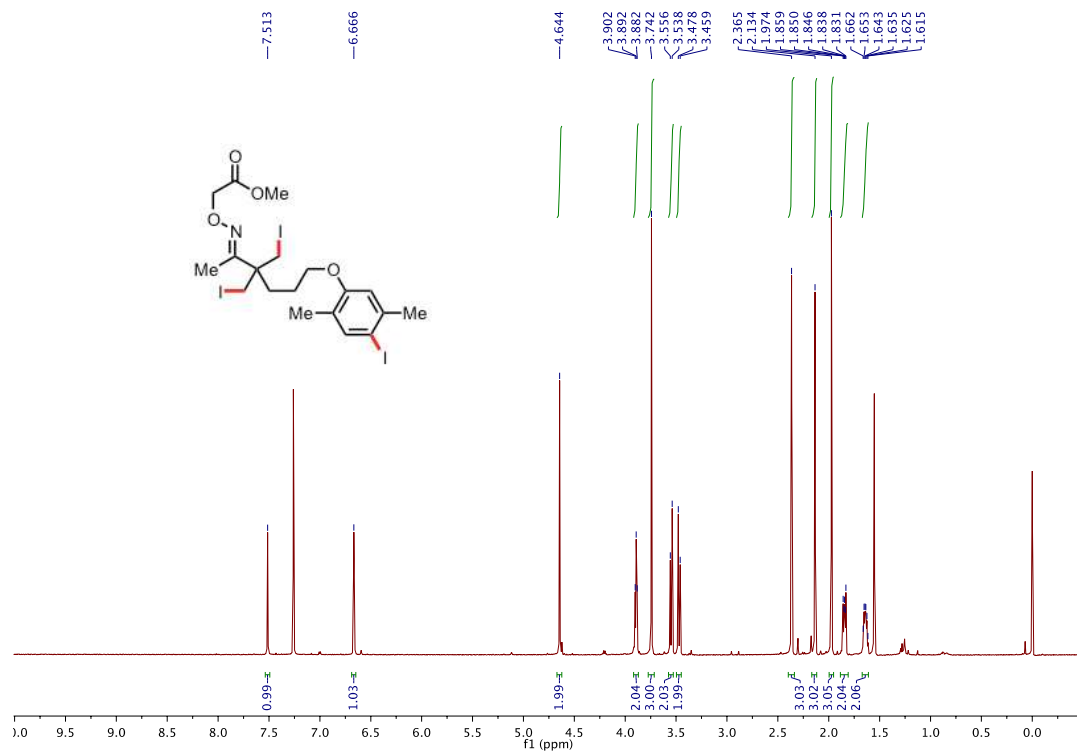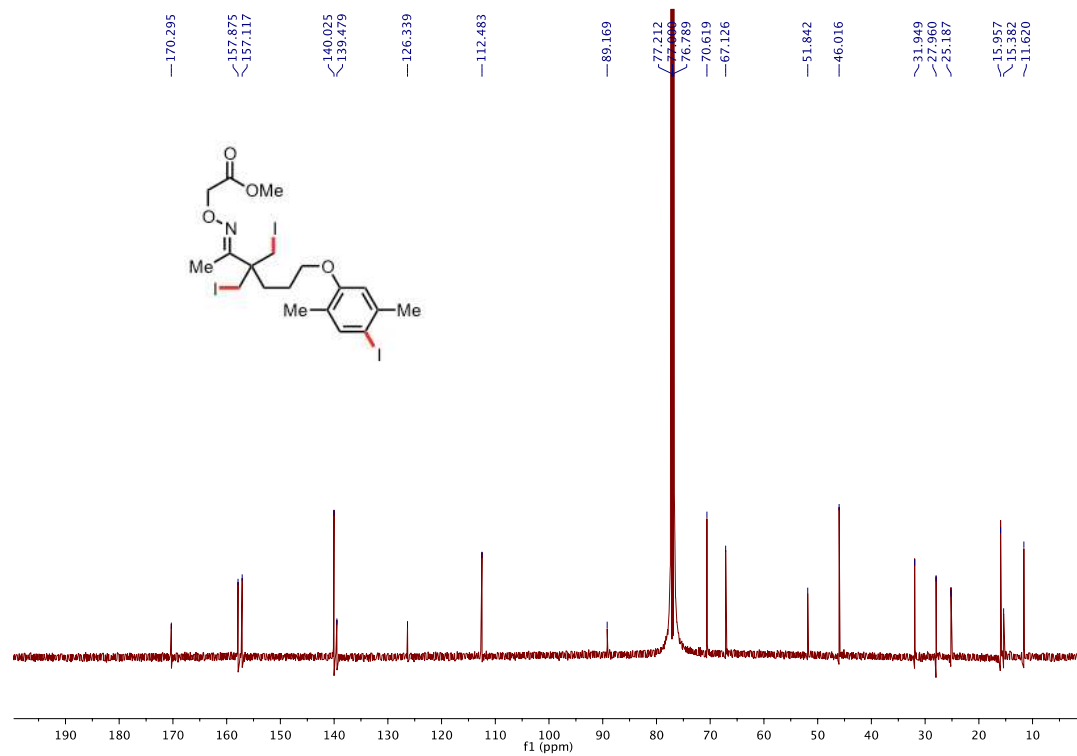

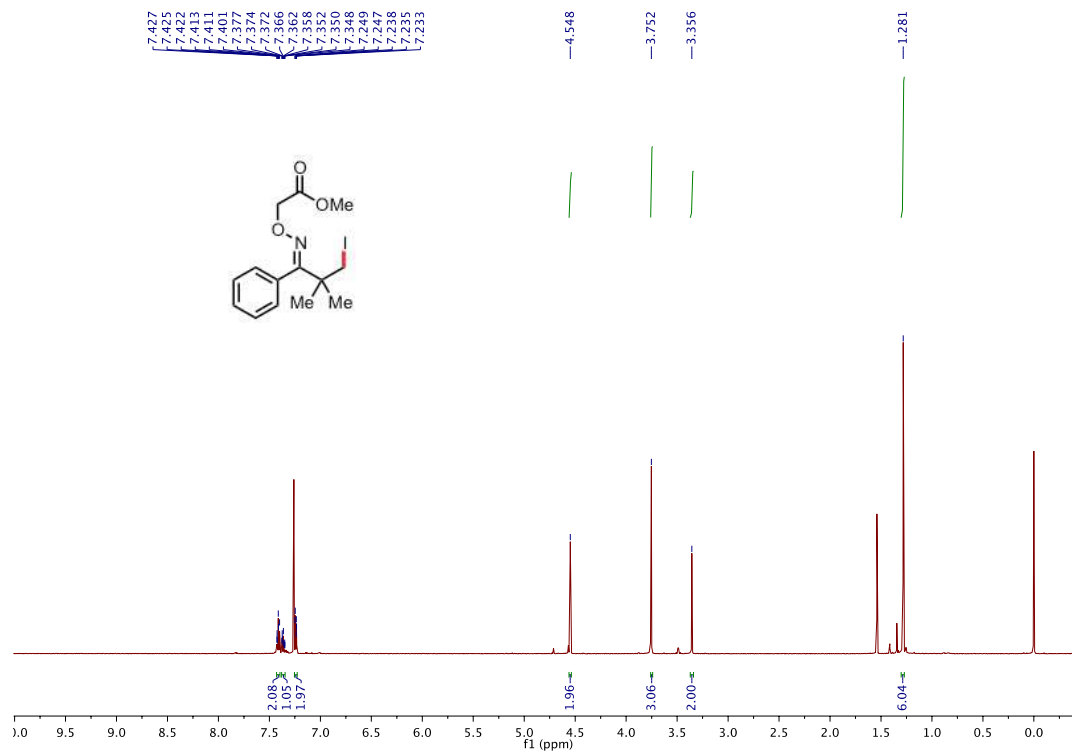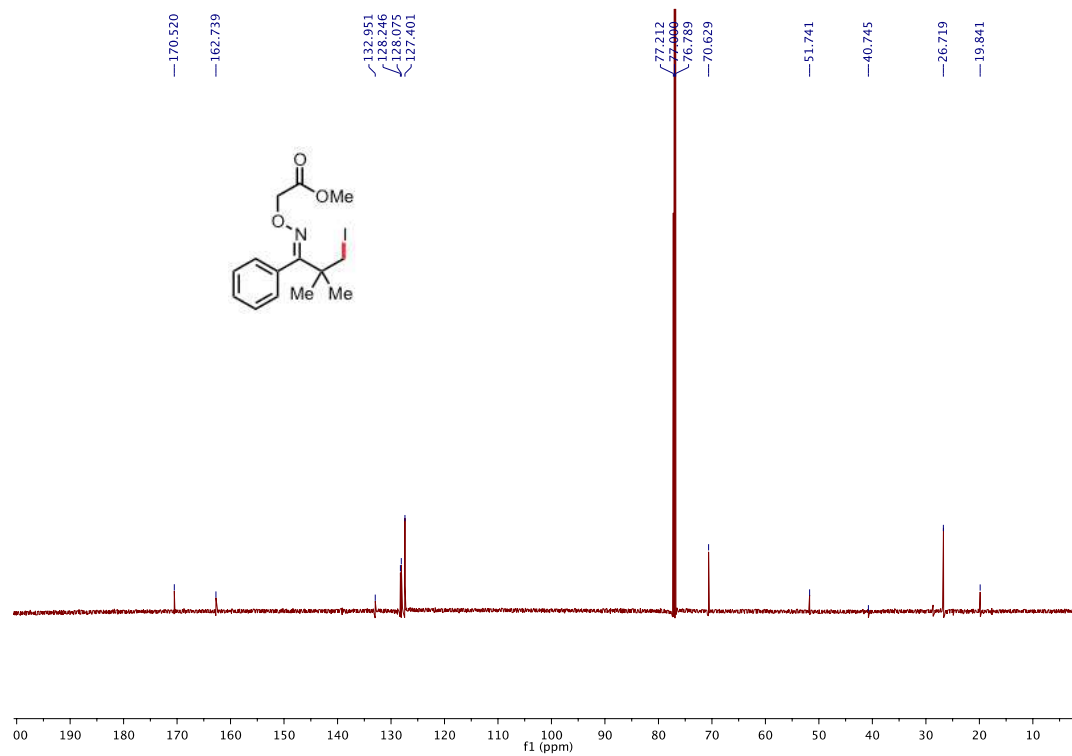



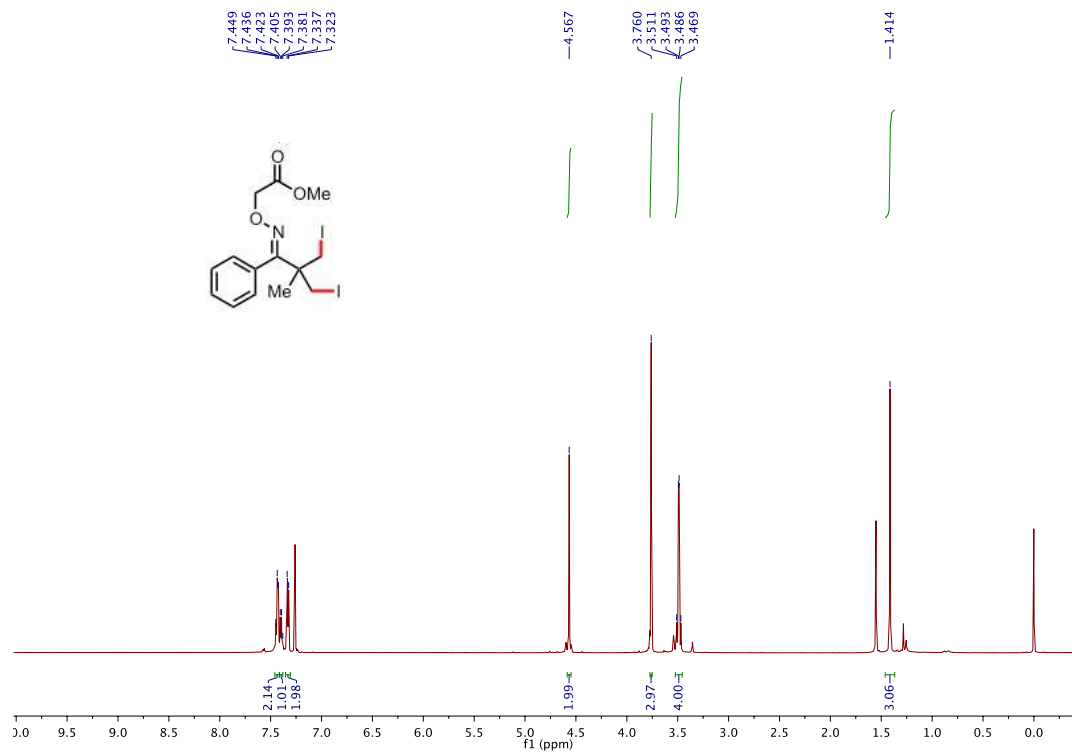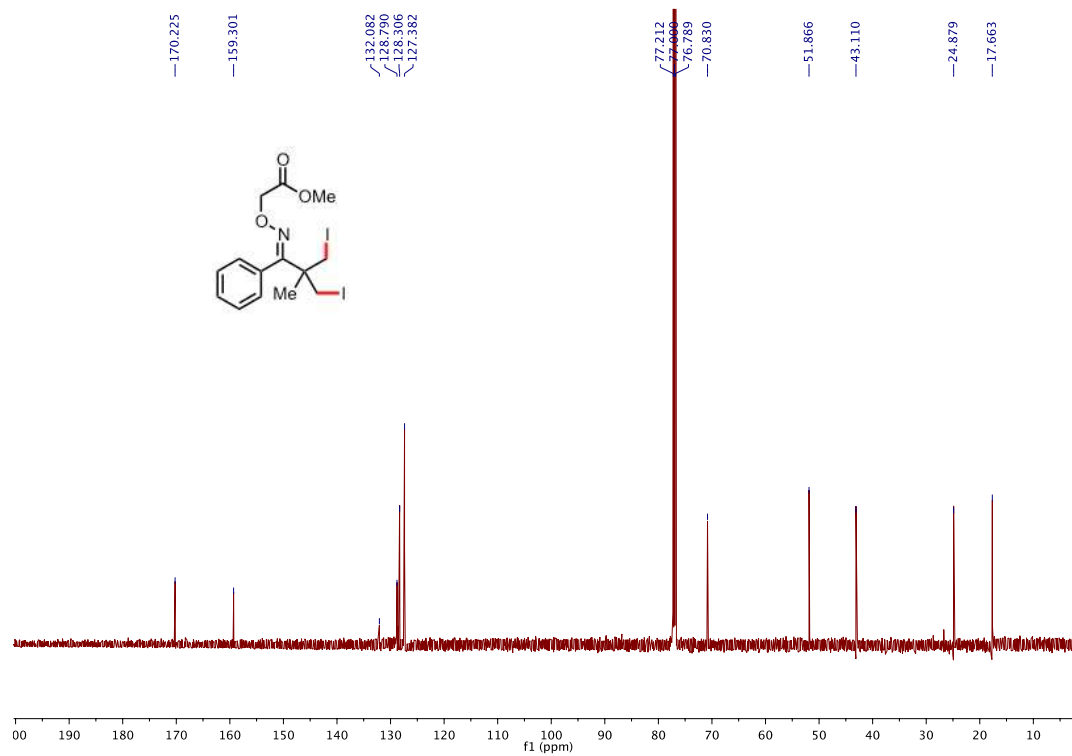

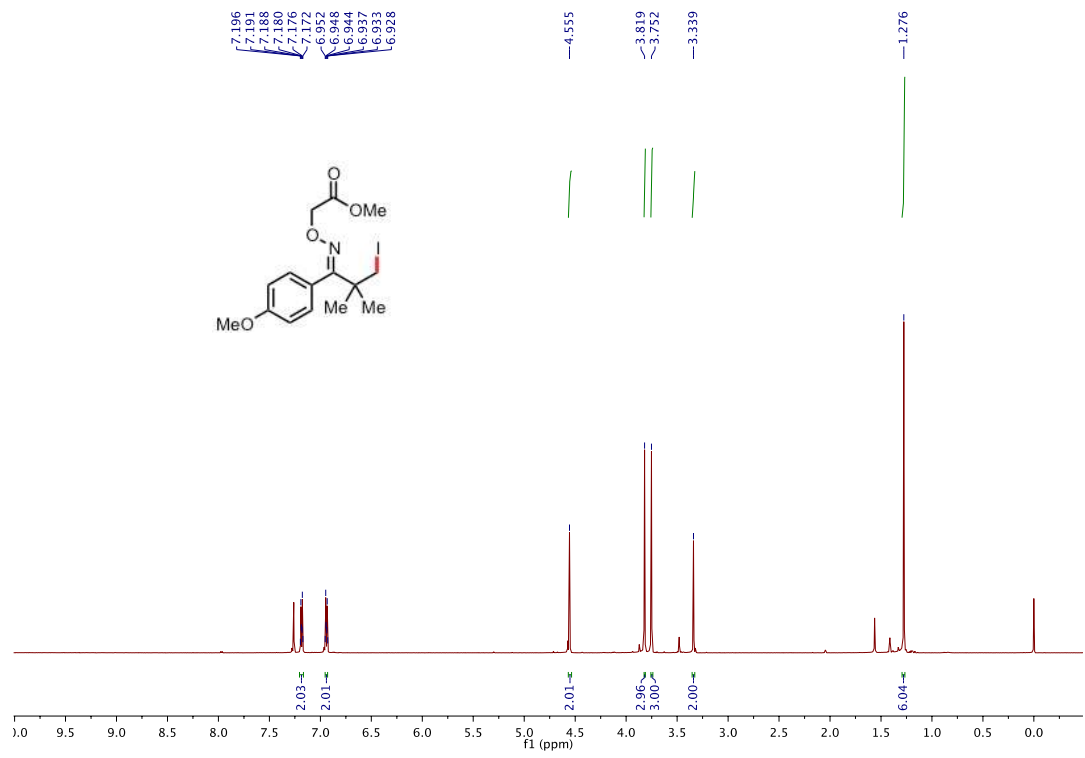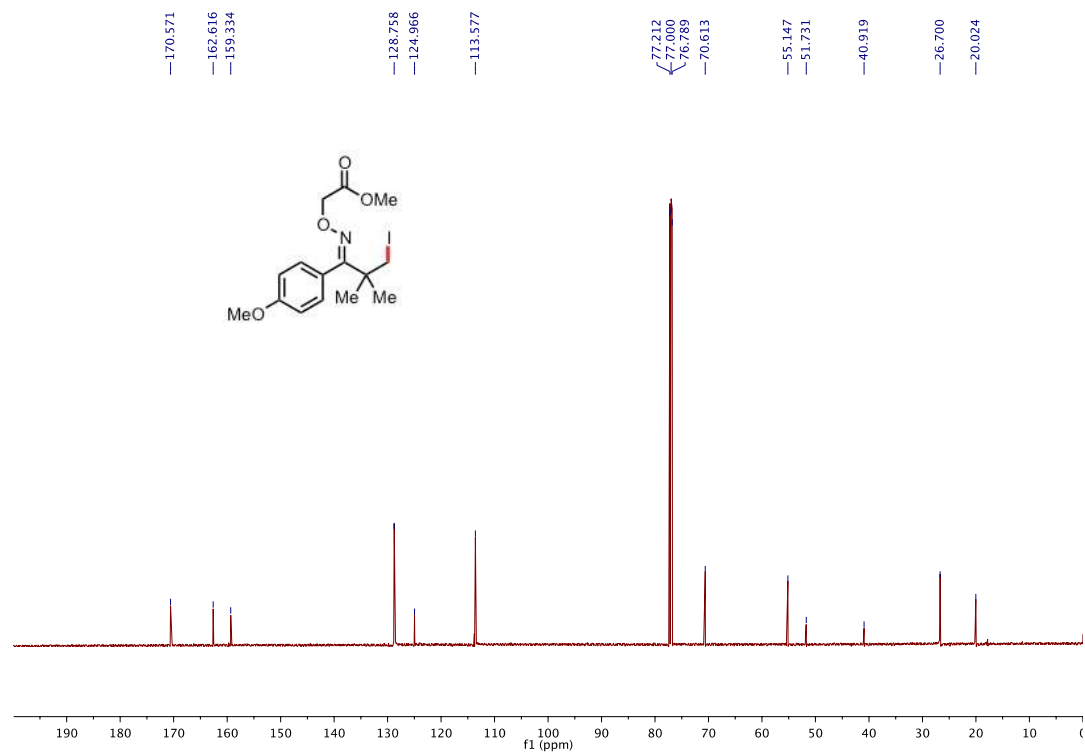

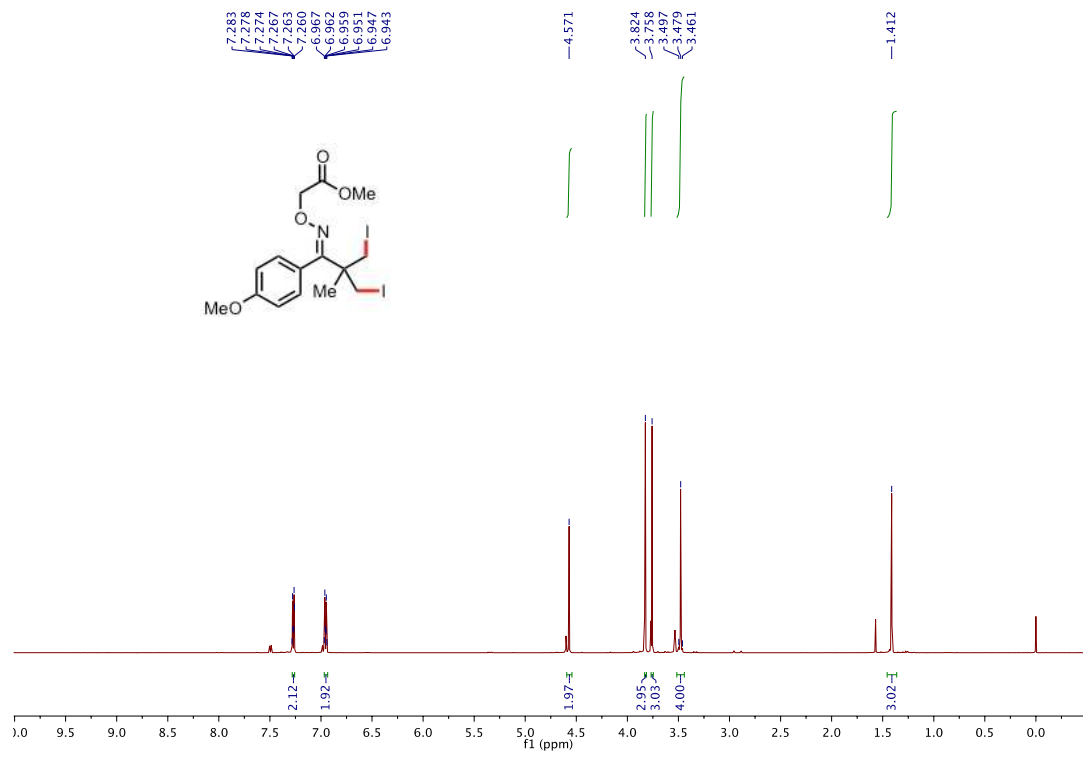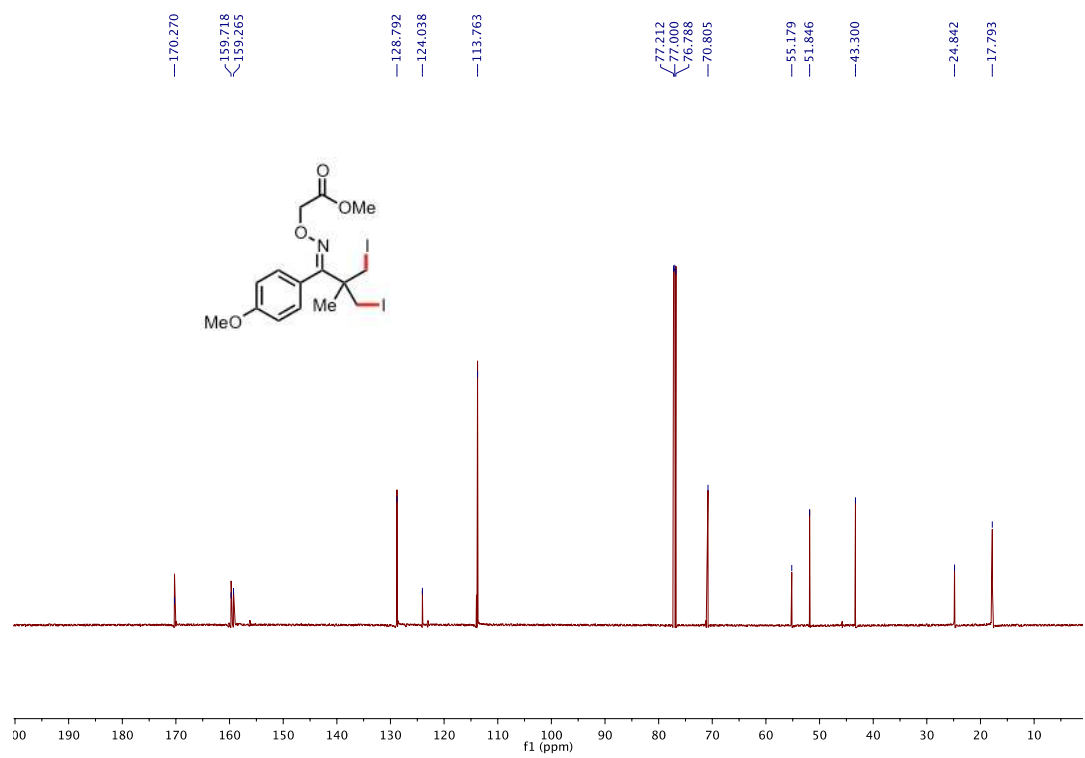

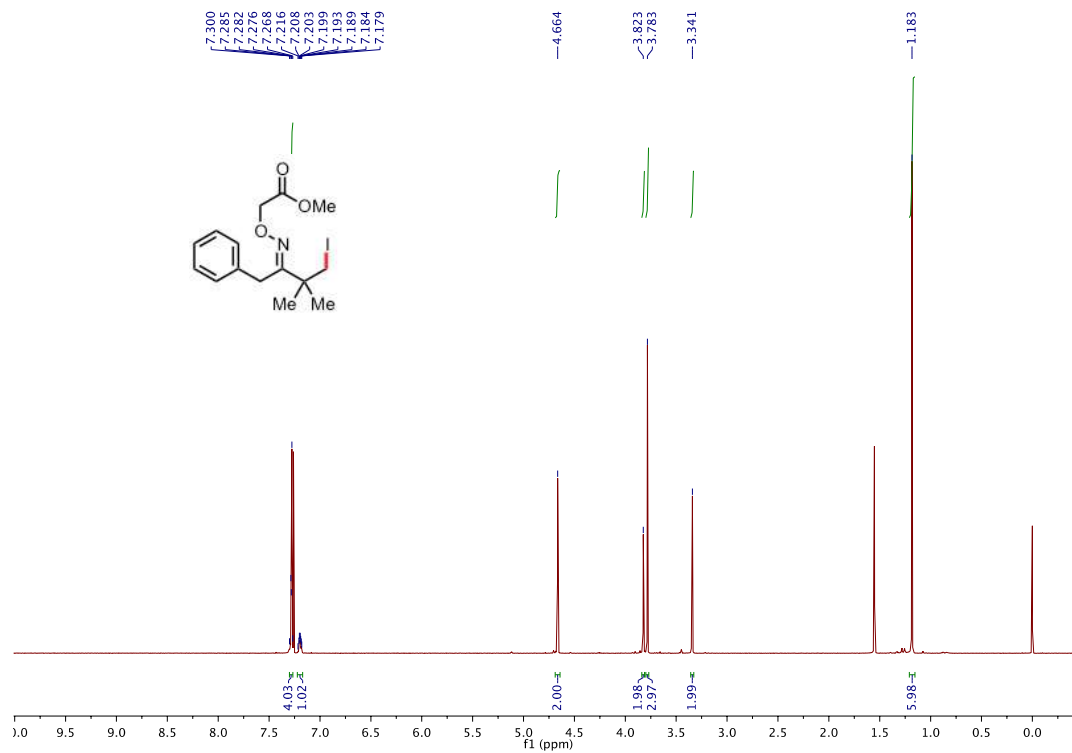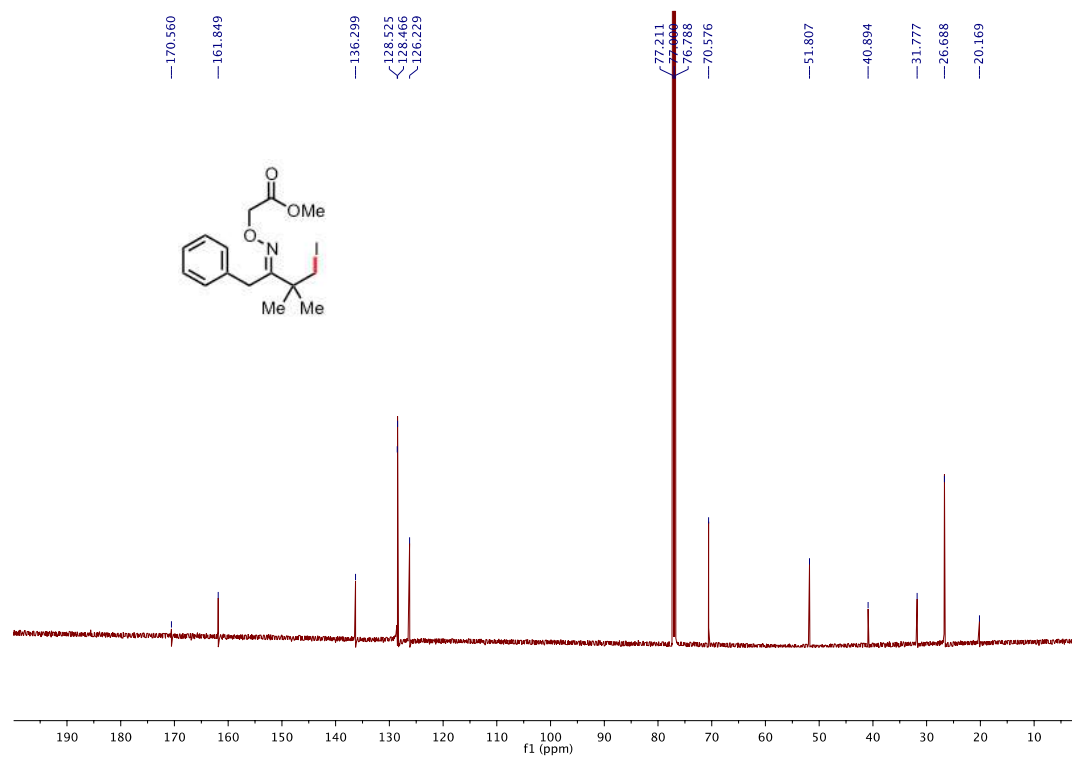

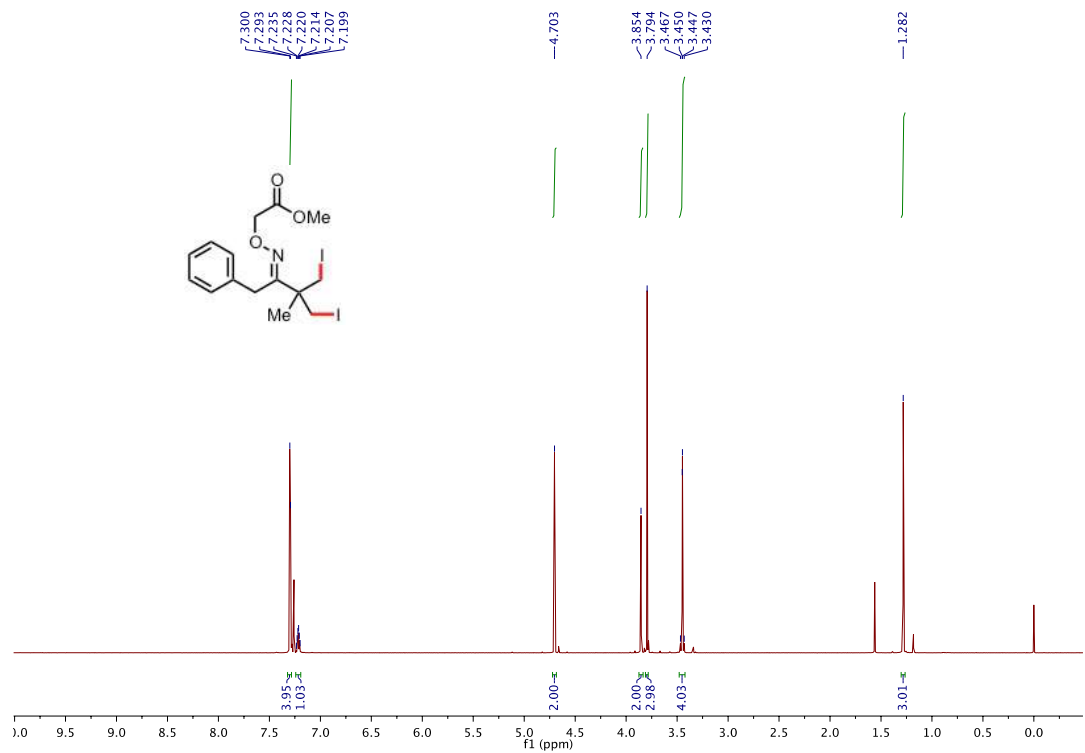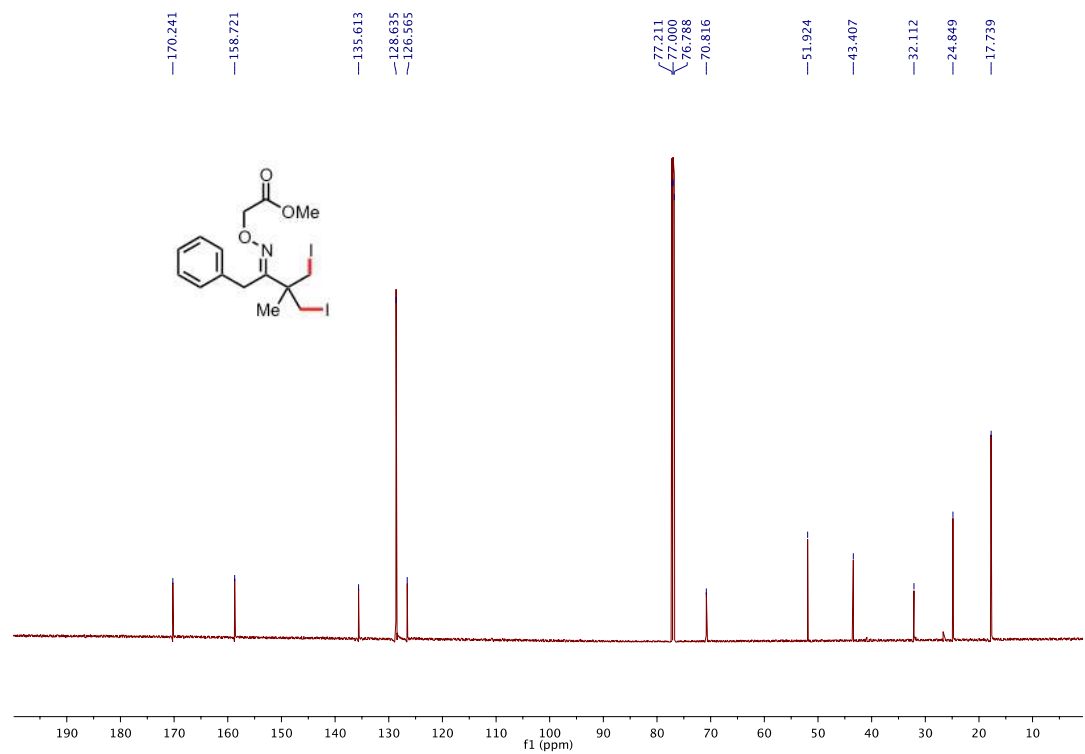

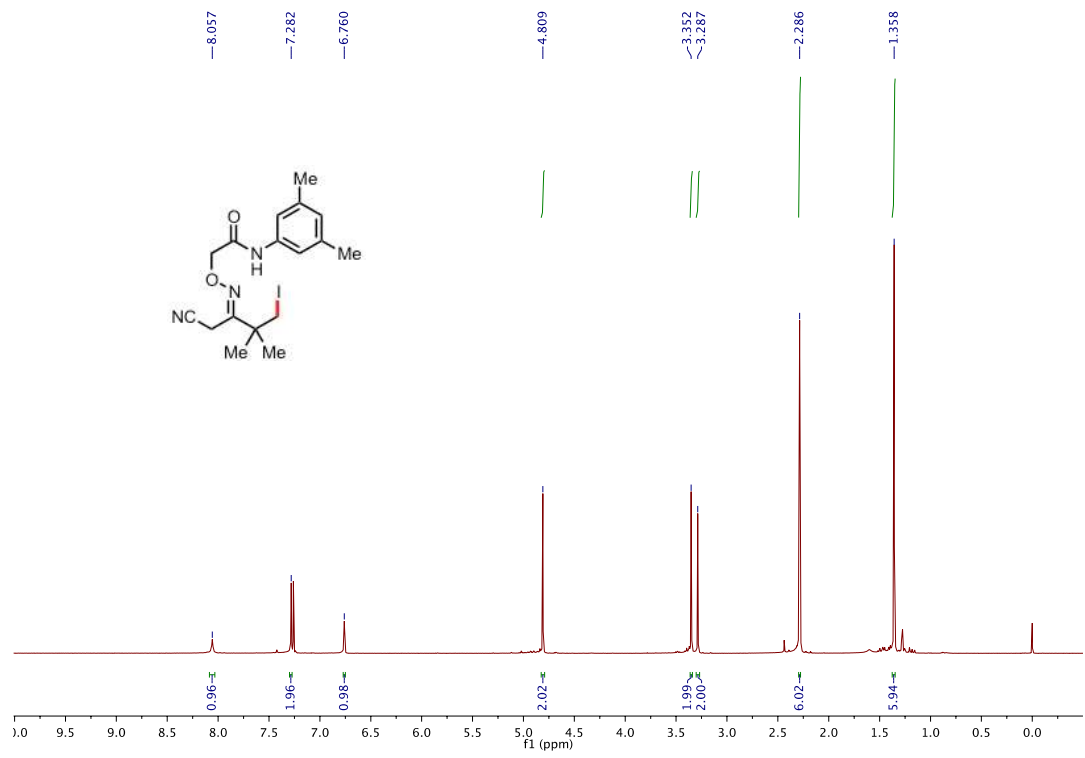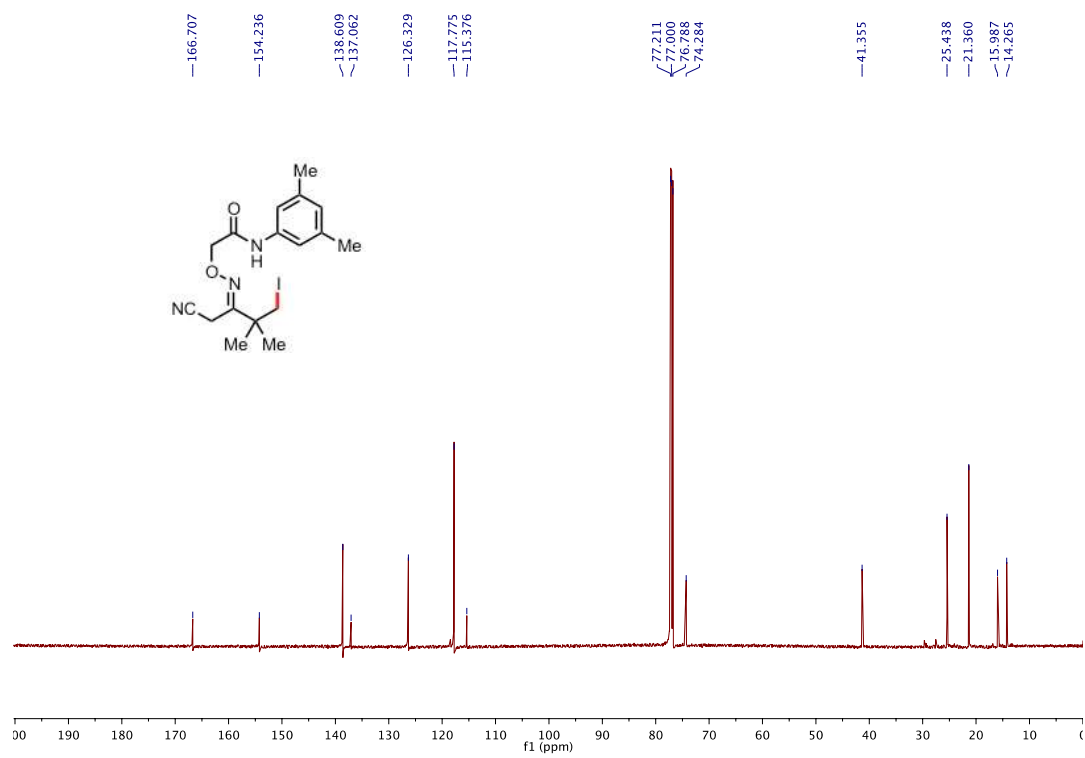

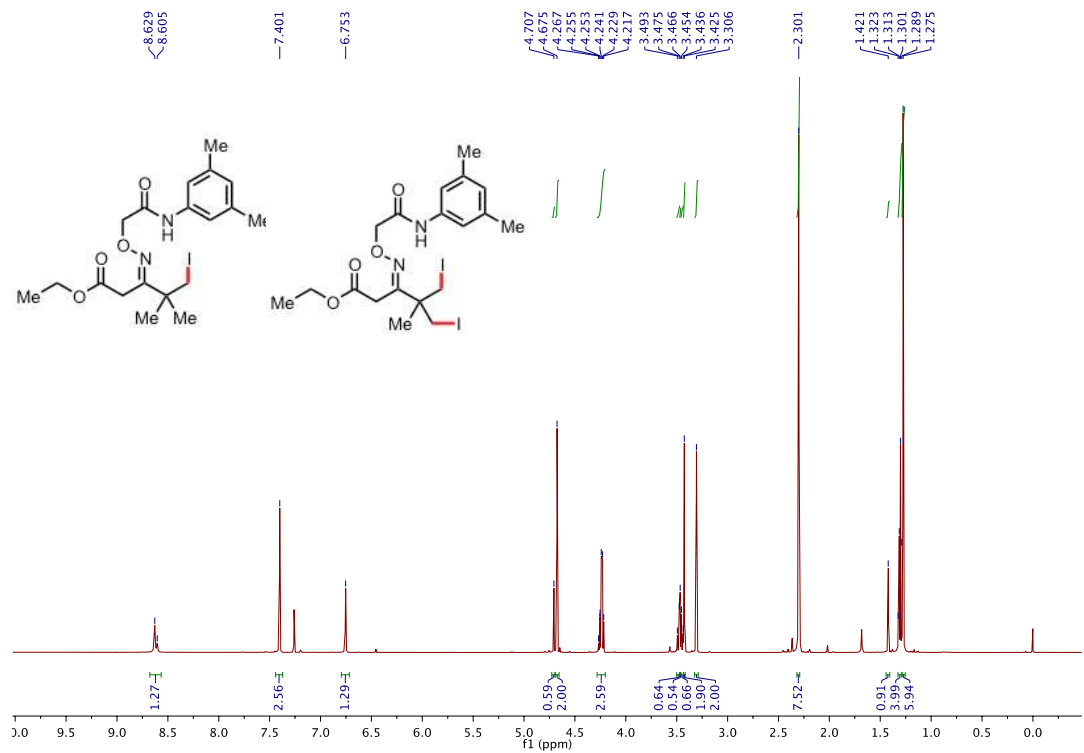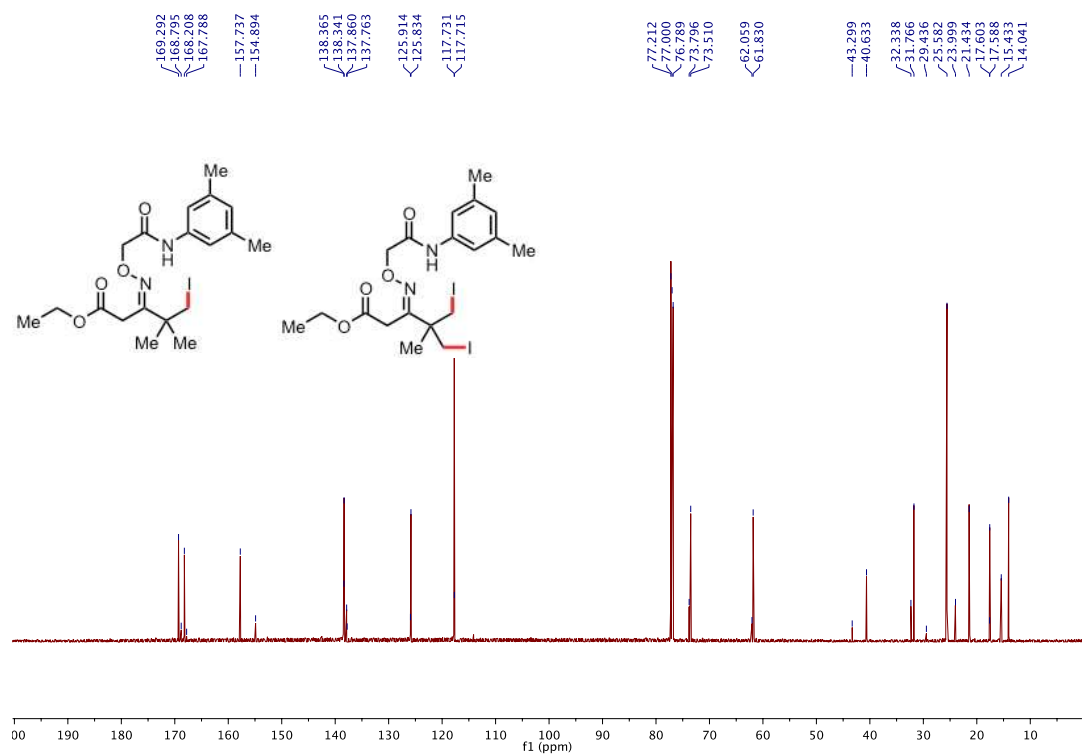

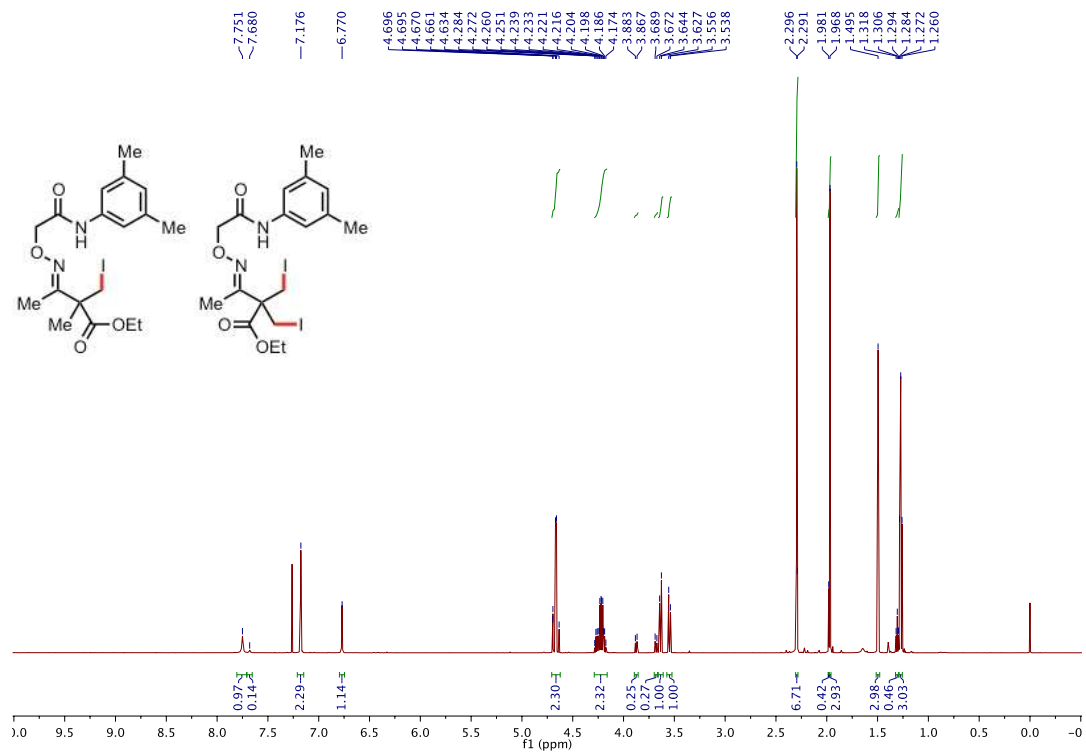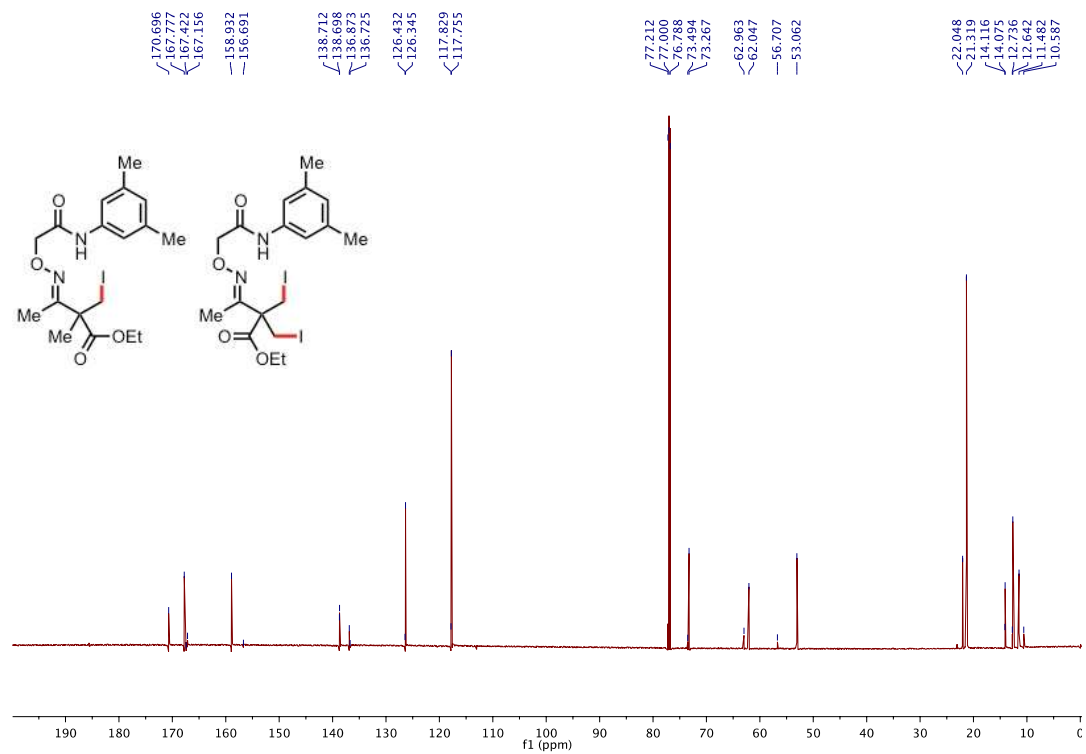



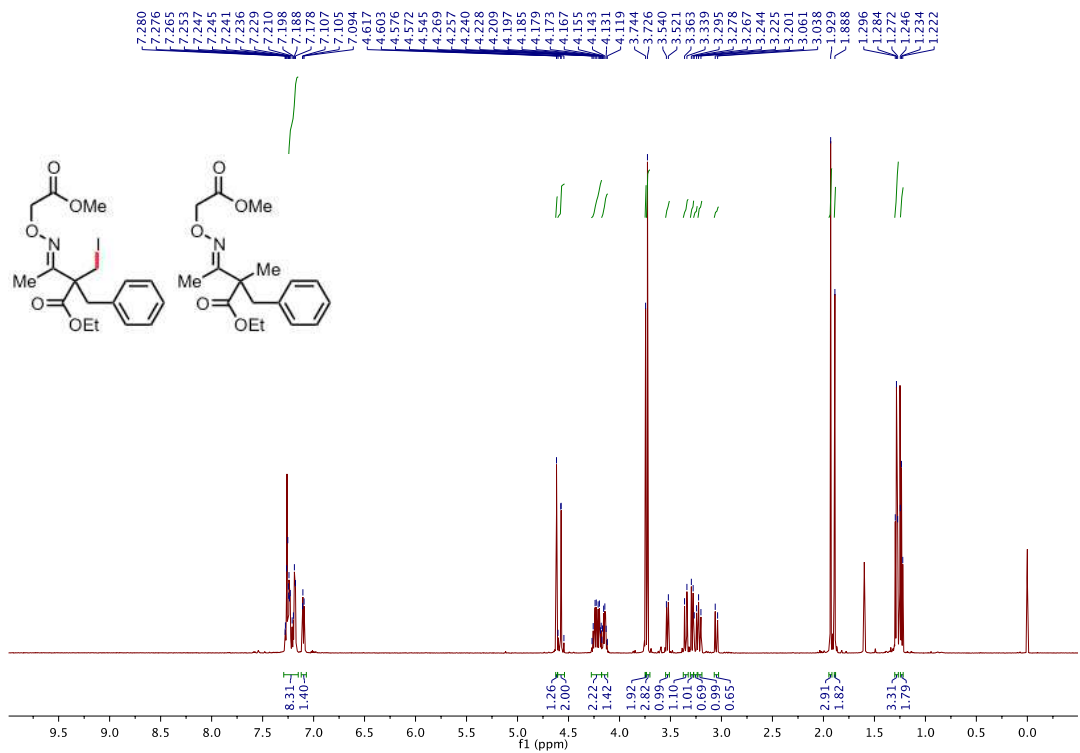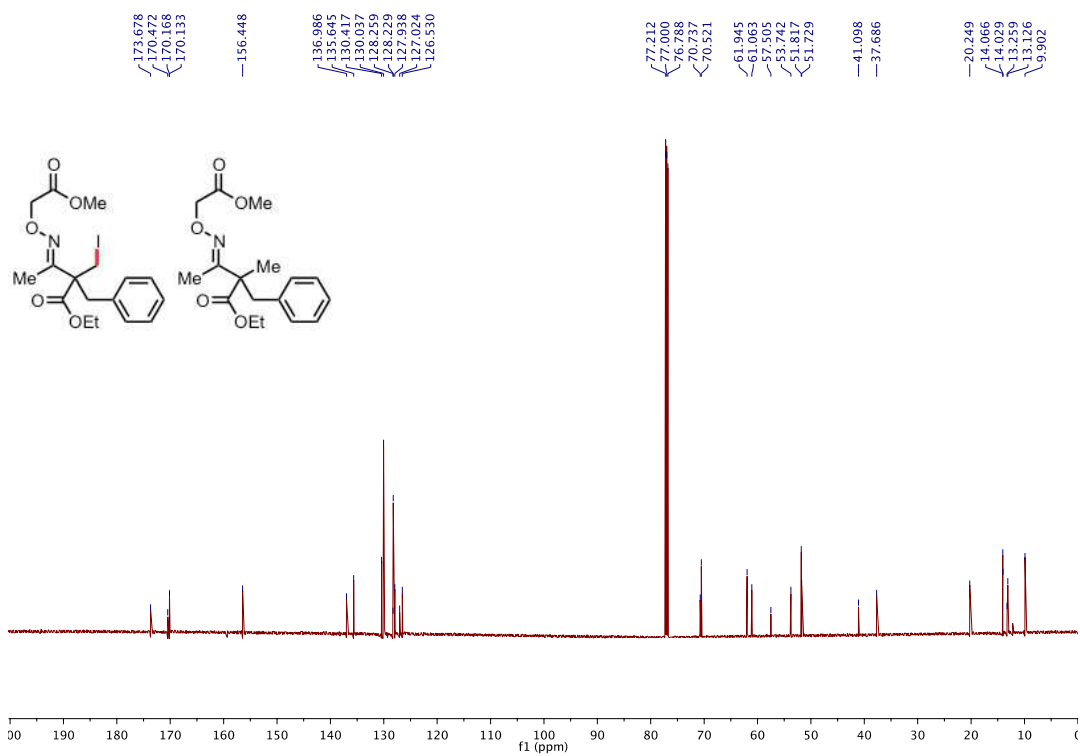

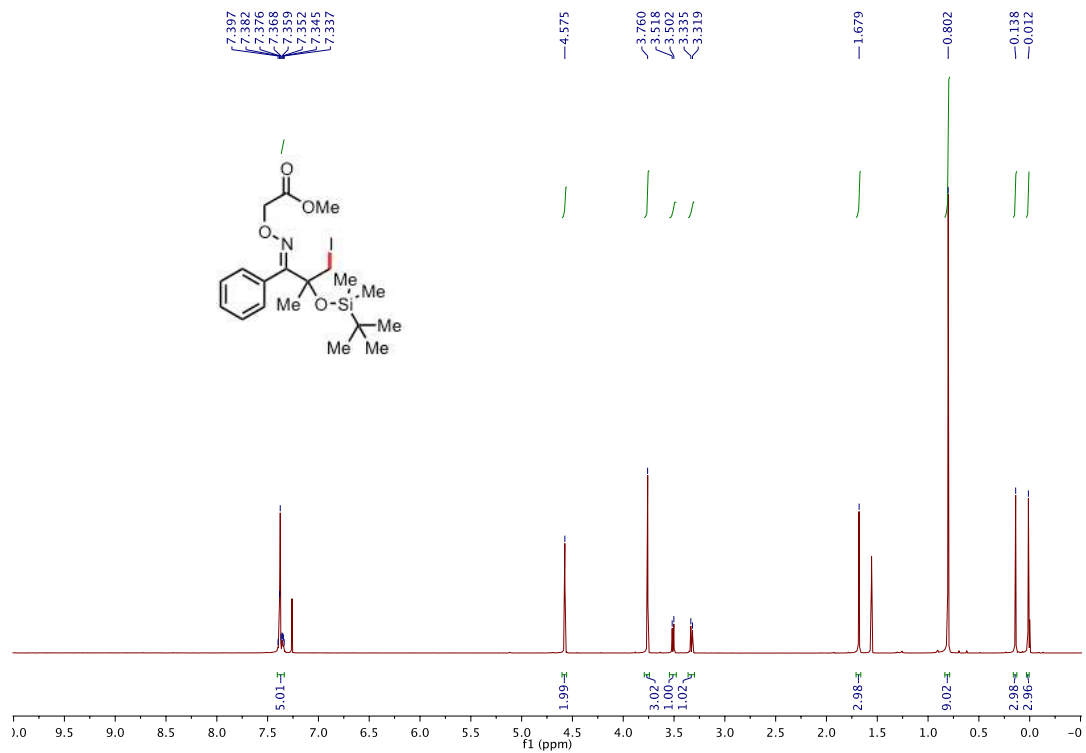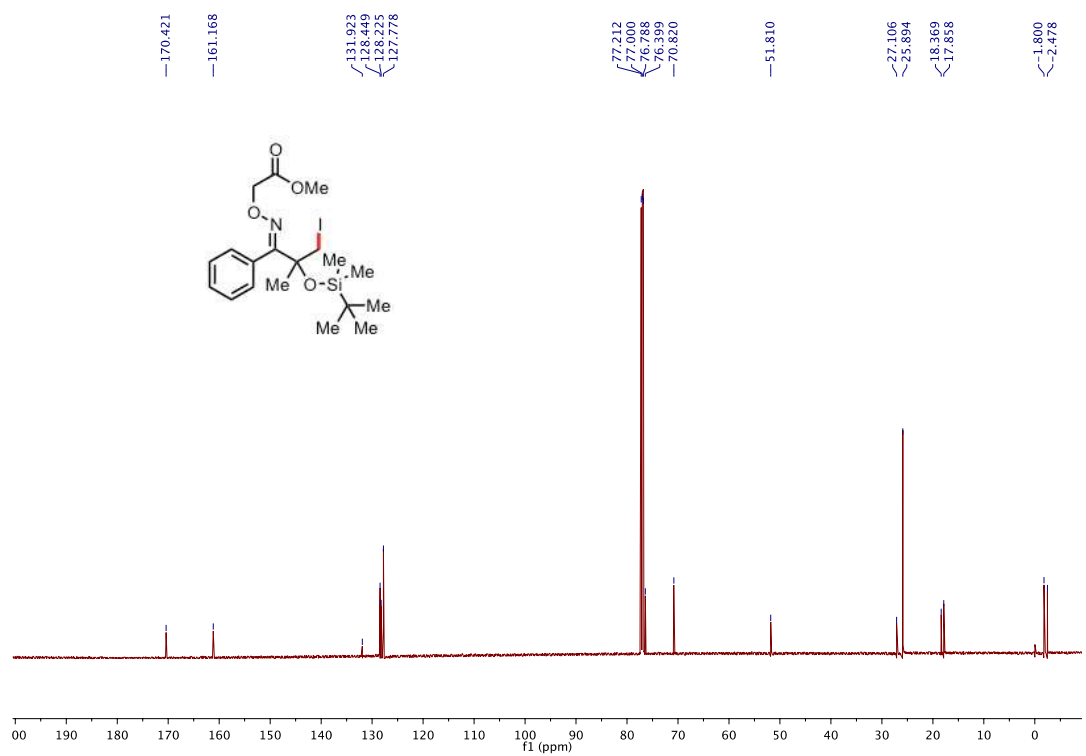

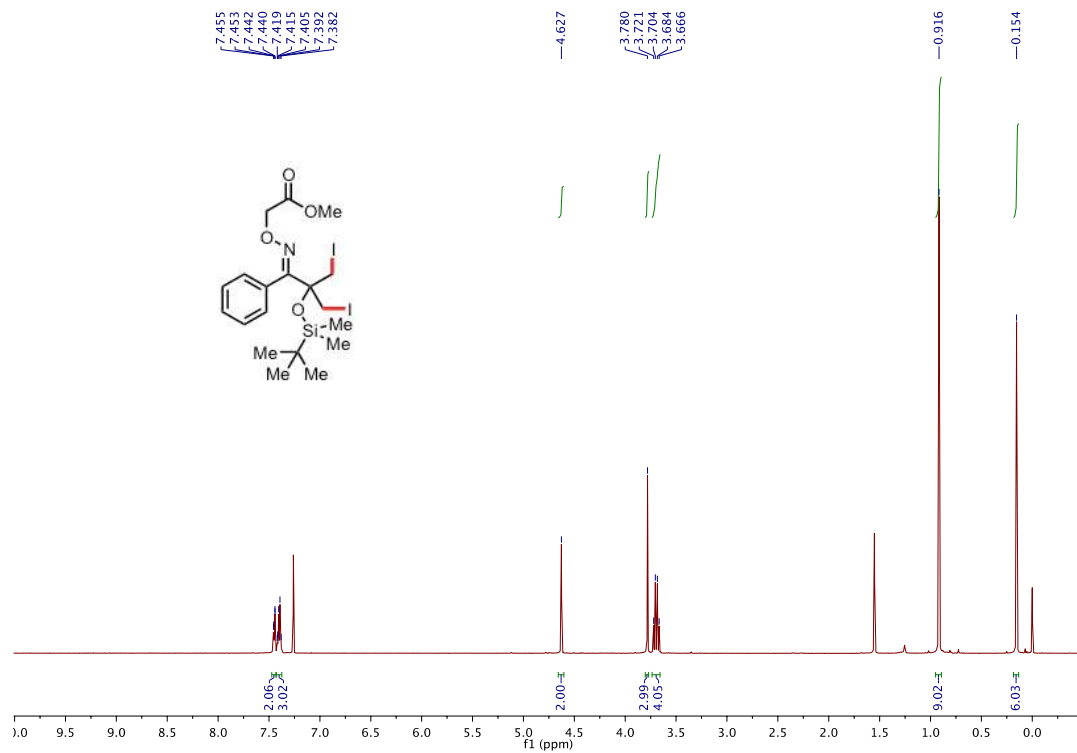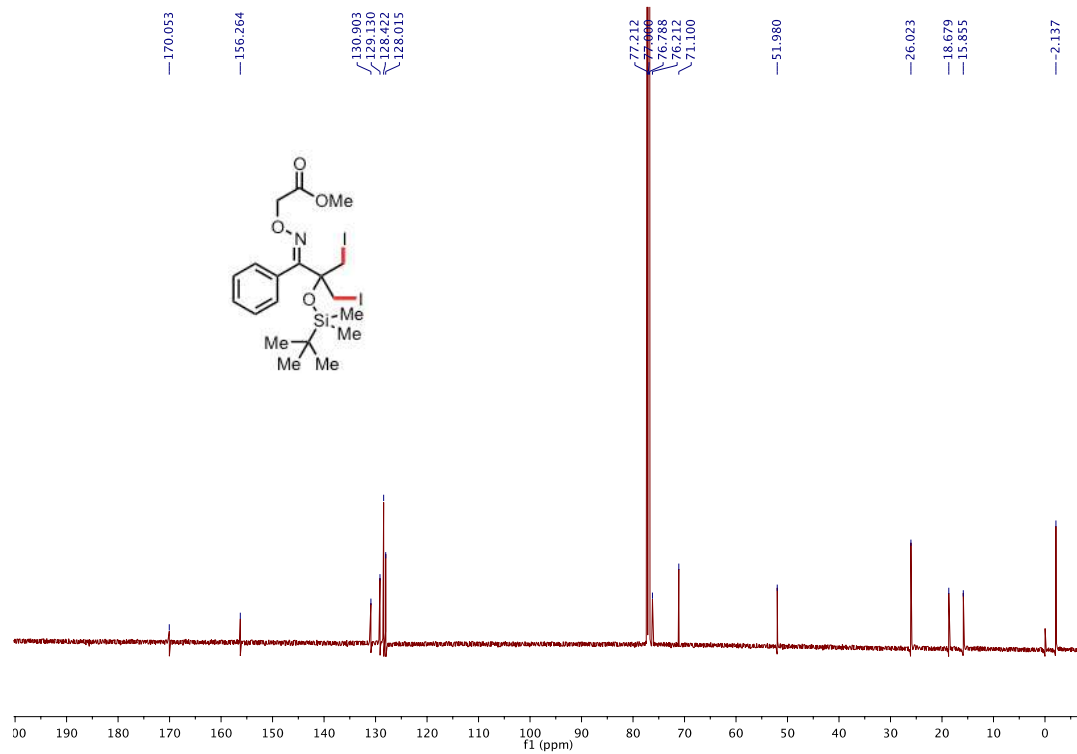

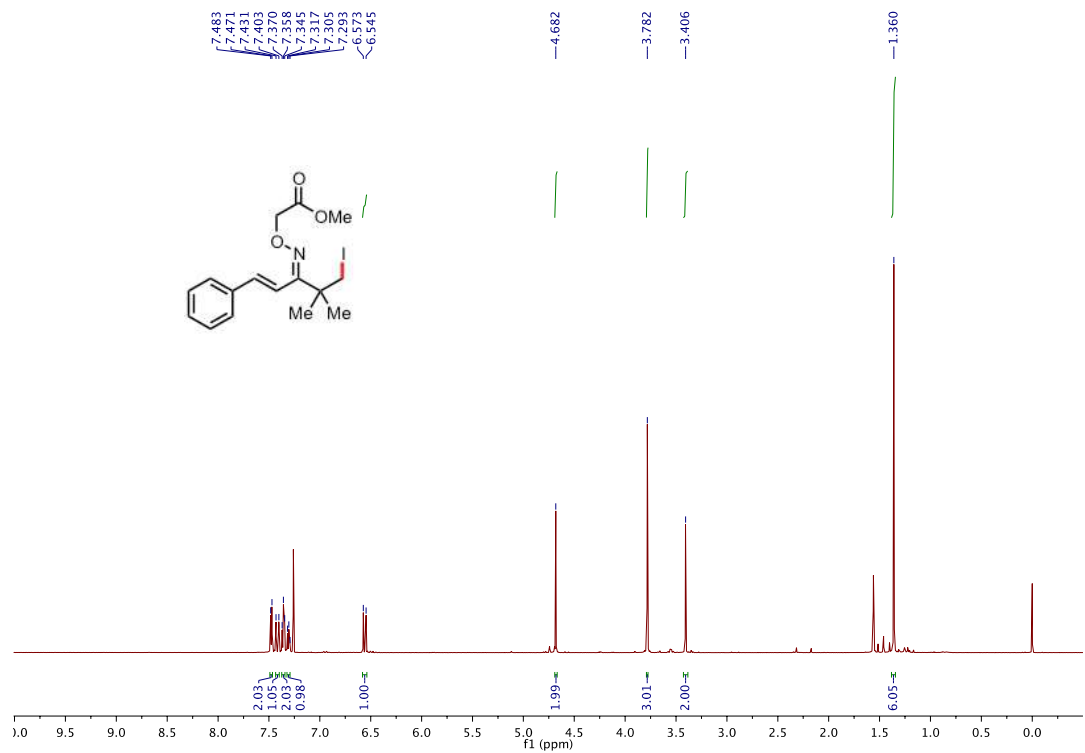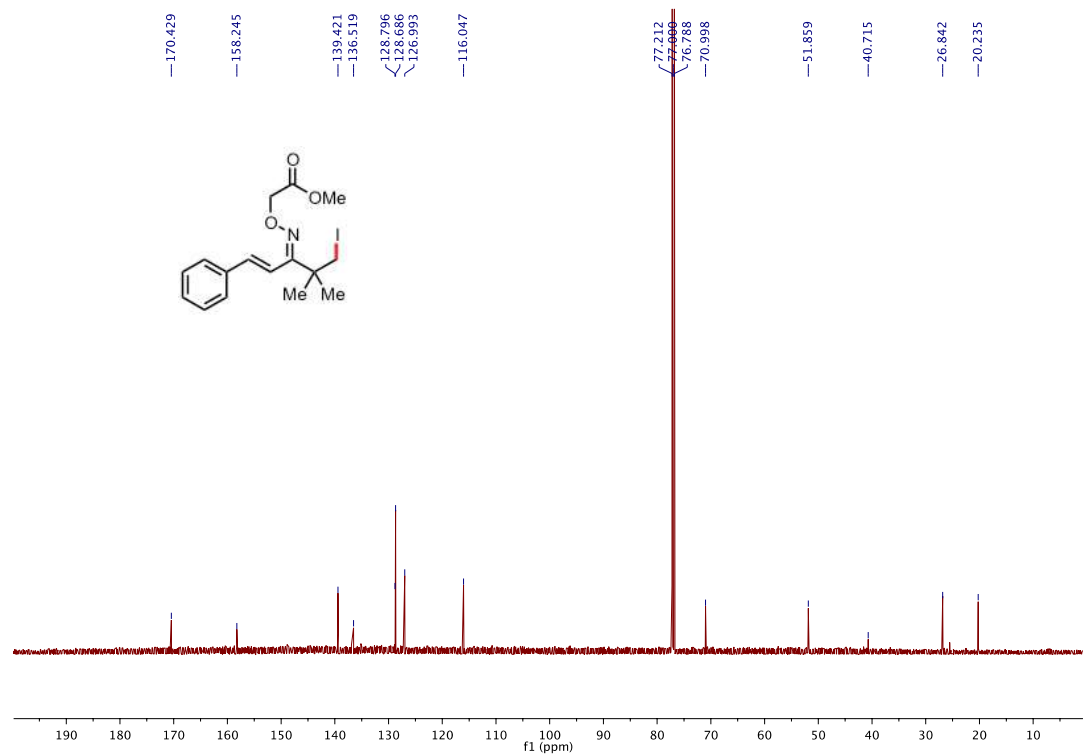

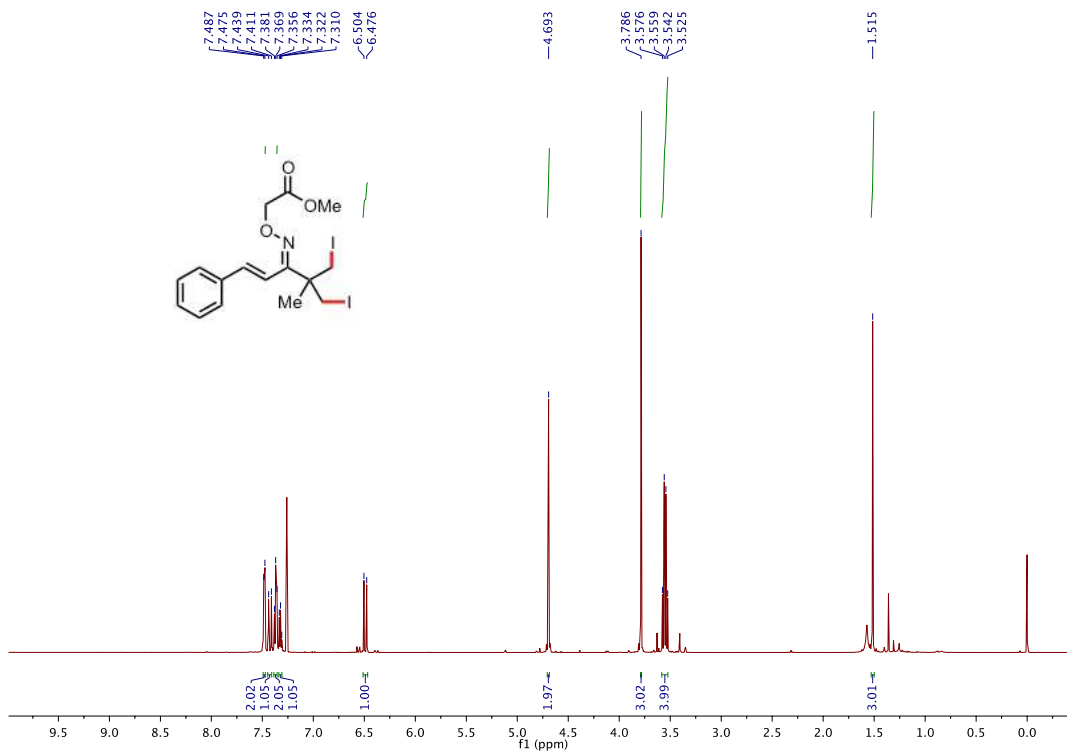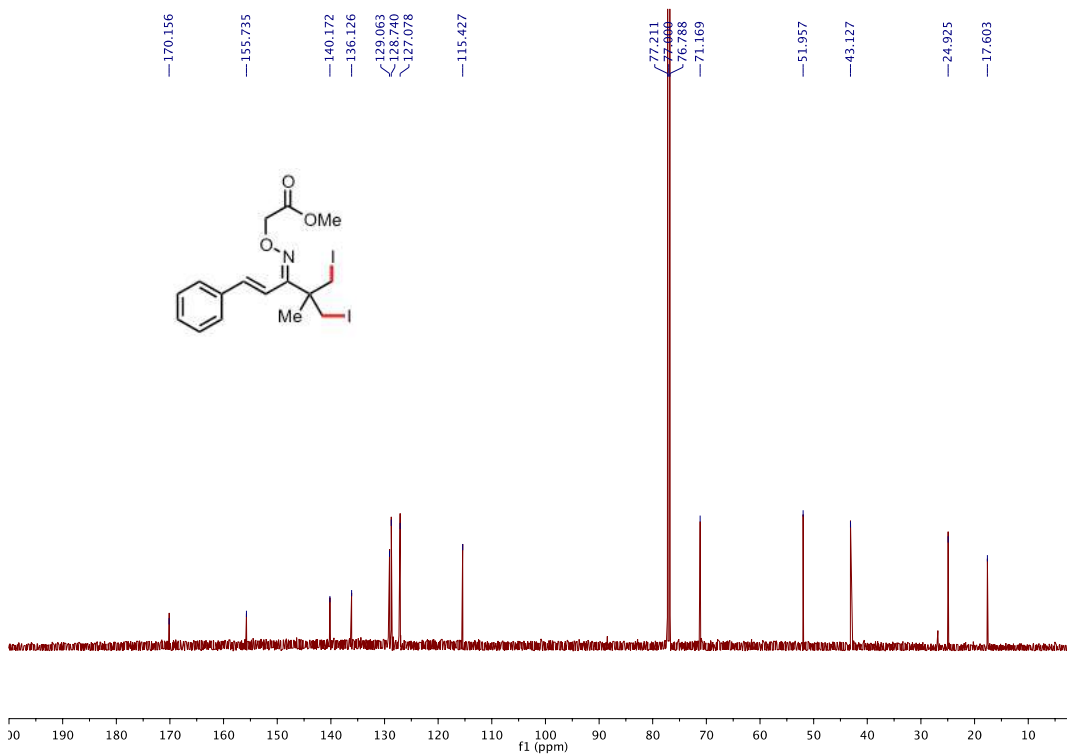

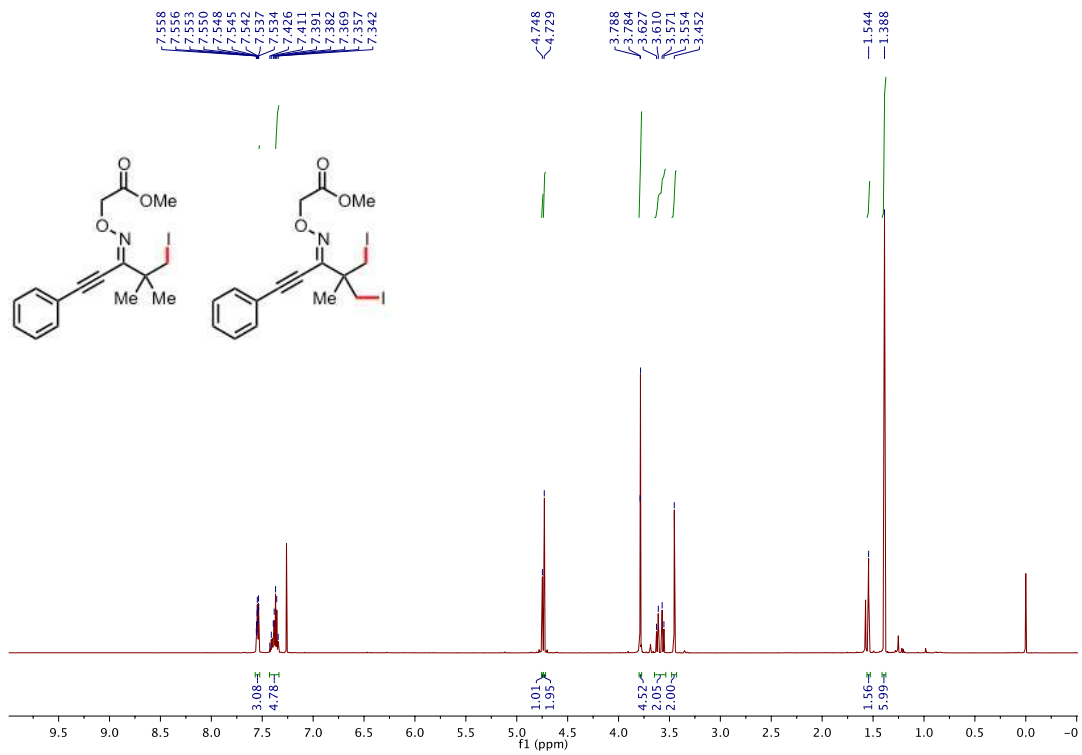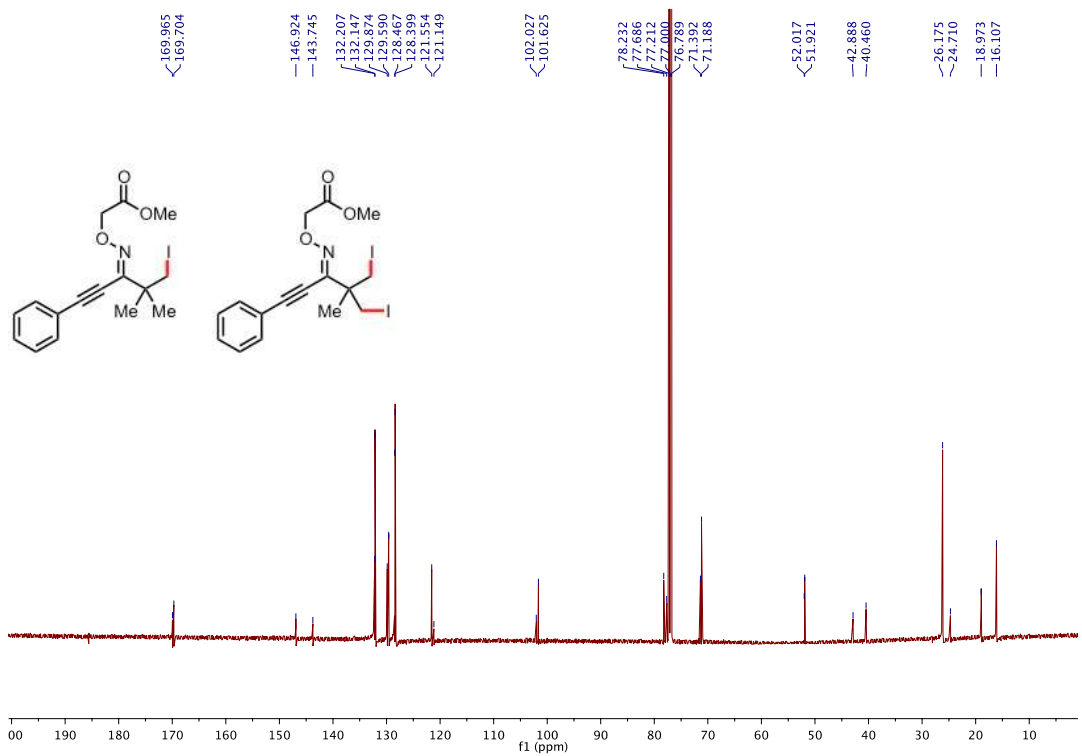

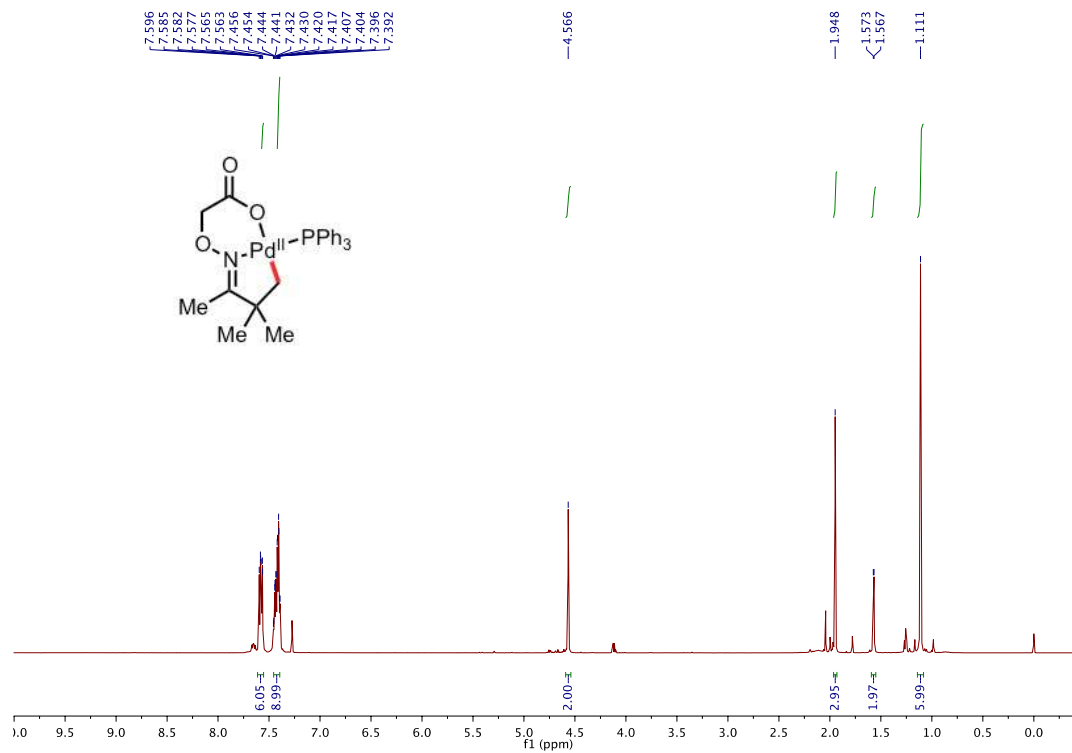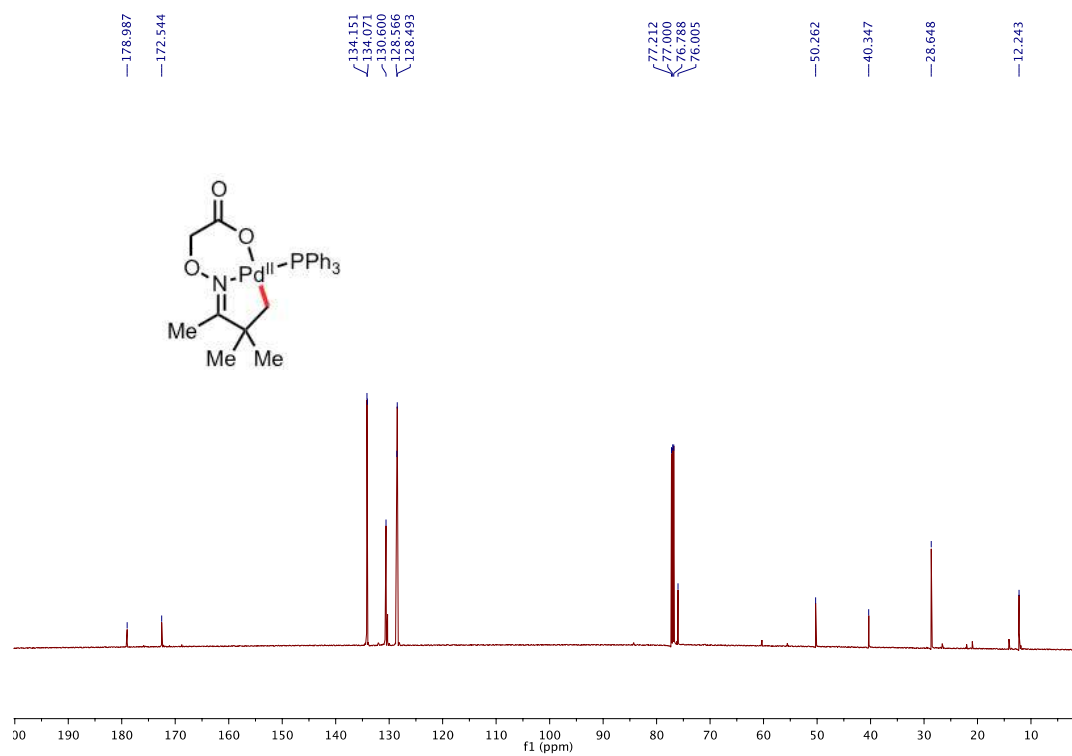

Supplement: NIHMS921021-supplement-SI.pdf [file NIHMS921021-supplement-SI.pdf]
